# Supplementary material for: Phenotypic Subtyping and Re-analyses of Existing Transcriptomic Data from Autistic Probands in Simplex Families Reveal Differentially Expressed and ASD Trait-Associated Genes
Source: Front Neurol. 2020 Nov 12;11:578972. doi: 10.3389/fneur.2020.578972 (PMC7689346; doi:10.3389/fneur.2020.578972)
Supplement: Supplementary Table 6 — Differentially expressed genes in the combined case group. [file Table_6.xlsx]

## Sheet: Sheet1
Table S6. Differentially expressed genes in the combined case group
Gene Symbol	Entrez Gene Name
AADAC	arylacetamide deacetylase
ABCC11	ATP binding cassette subfamily C member 11
ABI1	abl interactor 1
ACKR4	atypical chemokine receptor 4
ACSS3	acyl-CoA synthetase short chain family member 3
ACTL7A	actin like 7A
ADD2	adducin 2
ADGRF1	adhesion G protein-coupled receptor F1
ADGRG2	adhesion G protein-coupled receptor G2
AFF2	AF4/FMR2 family member 2
AIM2	absent in melanoma 2
AKAP7	A-kinase anchoring protein 7
AKAP11	A-kinase anchoring protein 11
ALX1	ALX homeobox 1
AMPD2	adenosine monophosphate deaminase 2
AMPH	amphiphysin
ANGPT4	angiopoietin 4
ANO7	anoctamin 7
AOC2	amine oxidase copper containing 2
ARNT2	aryl hydrocarbon receptor nuclear translocator 2
ART5	ADP-ribosyltransferase 5
ASB10	ankyrin repeat and SOCS box containing 10
ASCL2	achaete-scute family bHLH transcription factor 2
ASGR2	asialoglycoprotein receptor 2
ASIC2	acid sensing ion channel subunit 2
ASPDH	aspartate dehydrogenase domain containing
B3GALNT1	beta-1,3-N-acetylgalactosaminyltransferase 1 (globoside blood group)
B4GALT4	beta-1,4-galactosyltransferase 4
BEND7	BEN domain containing 7
BGN	biglycan
BMP10	bone morphogenetic protein 10
BMX	BMX non-receptor tyrosine kinase
BTNL2	butyrophilin like 2
C12orf42	chromosome 12 open reading frame 42
C14orf39	chromosome 14 open reading frame 39
C15orf32	chromosome 15 putative open reading frame 32
C1QTNF1	C1q and TNF related 1
C1QTNF12	C1q and TNF related 12
C21orf58	chromosome 21 open reading frame 58
C6orf118	chromosome 6 open reading frame 118
CADM3	cell adhesion molecule 3
CARD14	caspase recruitment domain family member 14
CASP5	caspase 5
CBR3	carbonyl reductase 3
CCDC117	coiled-coil domain containing 117
CCNB3	cyclin B3
CCNJL	cyclin J like
CCR9	C-C motif chemokine receptor 9
CD5	CD5 molecule
CDH15	cadherin 15
CDKN2C	cyclin dependent kinase inhibitor 2C
CHRNA1	cholinergic receptor nicotinic alpha 1 subunit
CHRNB2	cholinergic receptor nicotinic beta 2 subunit
CLEC4G	C-type lectin domain family 4 member G
CLHC1	clathrin heavy chain linker domain containing 1
CLK2P1	CDC like kinase 2, pseudogene 1
CLUL1	clusterin like 1
CNIH2	cornichon family AMPA receptor auxiliary protein 2
CNKSR1	connector enhancer of kinase suppressor of Ras 1
CNKSR2	connector enhancer of kinase suppressor of Ras 2
CNRIP1	cannabinoid receptor interacting protein 1
CNTN2	contactin 2
CNTN5	contactin 5
COL10A1	collagen type X alpha 1 chain
COL25A1	collagen type XXV alpha 1 chain
CPA5	carboxypeptidase A5
CRCP	CGRP receptor component
CRYBA2	crystallin beta A2
CRYM	crystallin mu
CSF1	colony stimulating factor 1
CYP2C9	cytochrome P450 family 2 subfamily C member 9
CYP4F3	cytochrome P450 family 4 subfamily F member 3
DACH1	dachshund family transcription factor 1
DEFB126	defensin beta 126
DENND2B	DENN domain containing 2B
DGCR5	--
DISC1	DISC1 scaffold protein
DPY19L2P2	DPY19L2 pseudogene 2
DRC1	dynein regulatory complex subunit 1
DSCAM	DS cell adhesion molecule
DSPP	dentin sialophosphoprotein
DUOXA1	dual oxidase maturation factor 1
DUSP15	dual specificity phosphatase 15
DZIP1	DAZ interacting zinc finger protein 1
EFEMP1	EGF containing fibulin extracellular matrix protein 1
EGFL7	EGF like domain multiple 7
EIF4G1	eukaryotic translation initiation factor 4 gamma 1
EPHB2	EPH receptor B2
ERBB3	erb-b2 receptor tyrosine kinase 3
ERICH6	glutamate rich 6
ERMAP	erythroblast membrane associated protein (Scianna blood group)
ETV5	ETS variant transcription factor 5
F8	coagulation factor VIII
FAM149A	family with sequence similarity 149 member A
FAM174B	family with sequence similarity 174 member B
FAM20C	FAM20C golgi associated secretory pathway kinase
FBLN1	fibulin 1
FBXO24	F-box protein 24
FBXO32	F-box protein 32
FEV	FEV transcription factor, ETS family member
FGF18	fibroblast growth factor 18
FGFBP2	fibroblast growth factor binding protein 2
FHL3	four and a half LIM domains 3
FLAD1	flavin adenine dinucleotide synthetase 1
FLRT2	fibronectin leucine rich transmembrane protein 2
FLT3	fms related receptor tyrosine kinase 3
FOXR2	forkhead box R2
FRMPD2	FERM and PDZ domain containing 2
GAD2	glutamate decarboxylase 2
GAL3ST3	galactose-3-O-sulfotransferase 3
GALR1	galanin receptor 1
GATA5	GATA binding protein 5
GCNT2	glucosaminyl (N-acetyl) transferase 2 (I blood group)
GGA1	golgi associated, gamma adaptin ear containing, ARF binding protein 1
GJB3	gap junction protein beta 3
GKN1	gastrokine 1
GLIS1	GLIS family zinc finger 1
GMCL2	germ cell-less 2, spermatogenesis associated
GPALPP1	GPALPP motifs containing 1
GPR107	G protein-coupled receptor 107
GREB1	growth regulating estrogen receptor binding 1
GRHL1	grainyhead like transcription factor 1
GRIK2	glutamate ionotropic receptor kainate type subunit 2
GSDMC	gasdermin C
GTDC1	glycosyltransferase like domain containing 1
GUCA2B	guanylate cyclase activator 2B
GUCY2F	guanylate cyclase 2F, retinal
H4C4	H4 clustered histone 4
HAPLN1	hyaluronan and proteoglycan link protein 1
HBE1	hemoglobin subunit epsilon 1
HCRTR1	hypocretin receptor 1
HEMGN	hemogen
HERC2P4	hect domain and RLD 2 pseudogene 4
HGF	hepatocyte growth factor
HHIP	hedgehog interacting protein
HOXA3	homeobox A3
HOXC6	homeobox C6
HPD	4-hydroxyphenylpyruvate dioxygenase
HYAL1	hyaluronidase 1
IFNA17	interferon alpha 17
IGDCC3	immunoglobulin superfamily DCC subclass member 3
IGSF11	immunoglobulin superfamily member 11
IL4	interleukin 4
IL33	interleukin 33
IL31RA	interleukin 31 receptor A
IQCF1	IQ motif containing F1
ITGA3	integrin subunit alpha 3
ITGB1	integrin subunit beta 1
IZUMO2	IZUMO family member 2
JRK	Jrk helix-turn-helix protein
KAAG1	kidney associated antigen 1
KCNG3	potassium voltage-gated channel modifier subfamily G member 3
KCNJ1	potassium inwardly rectifying channel subfamily J member 1
KCTD4	potassium channel tetramerization domain containing 4
KCTD8	potassium channel tetramerization domain containing 8
KCTD14	potassium channel tetramerization domain containing 14
KIF9	kinesin family member 9
KIF25	kinesin family member 25
KIFC3	kinesin family member C3
KLHDC7A	kelch domain containing 7A
KLK3	kallikrein related peptidase 3
KLK9	kallikrein related peptidase 9
KRT1	keratin 1
KRT77	keratin 77
LCE3B	late cornified envelope 3B
LCE3C	late cornified envelope 3C
LCN2	lipocalin 2
LDHAL6B	lactate dehydrogenase A like 6B
LENG1	leukocyte receptor cluster member 1
LGR4	leucine rich repeat containing G protein-coupled receptor 4
LHX3	LIM homeobox 3
LIG3	DNA ligase 3
LILRA5	leukocyte immunoglobulin like receptor A5
LIM2	lens intrinsic membrane protein 2
LINC02875	long intergenic non-protein coding RNA 2875
LYPLA1	lysophospholipase 1
LYST	lysosomal trafficking regulator
MAB21L2	mab-21 like 2
MAFK	MAF bZIP transcription factor K
MAGEA8	MAGE family member A8
MAGEA11	MAGE family member A11
MAML1	mastermind like transcriptional coactivator 1
MAP3K7CL	MAP3K7 C-terminal like
MAP4K4	mitogen-activated protein kinase kinase kinase kinase 4
MARCHF5	membrane associated ring-CH-type finger 5
MARCHF10	membrane associated ring-CH-type finger 10
MARK2	microtubule affinity regulating kinase 2
MCAT	malonyl-CoA-acyl carrier protein transacylase
MED31	mediator complex subunit 31
MEPE	matrix extracellular phosphoglycoprotein
MITF	melanocyte inducing transcription factor
MOV10L1	Mov10 like RISC complex RNA helicase 1
MS4A12	membrane spanning 4-domains A12
MS4A6A	membrane spanning 4-domains A6A
MSRB3	methionine sulfoxide reductase B3
MXI1	MAX interactor 1, dimerization protein
NECAB3	N-terminal EF-hand calcium binding protein 3
NET1	neuroepithelial cell transforming 1
NIPSNAP3B	nipsnap homolog 3B
NOG	noggin
NPY2R	neuropeptide Y receptor Y2
NR1D1	nuclear receptor subfamily 1 group D member 1
NR1I3	nuclear receptor subfamily 1 group I member 3
NR2E3	nuclear receptor subfamily 2 group E member 3
NR5A1	nuclear receptor subfamily 5 group A member 1
NXF2/NXF2B	nuclear RNA export factor 2
NXPE4	neurexophilin and PC-esterase domain family member 4
NXPH2	neurexophilin 2
OR10A4	olfactory receptor family 10 subfamily A member 4
OR10H1	olfactory receptor family 10 subfamily H member 1
OR10H4	olfactory receptor family 10 subfamily H member 4
OR10V1	olfactory receptor family 10 subfamily V member 1
OR10Z1	olfactory receptor family 10 subfamily Z member 1
OR14I1	olfactory receptor family 14 subfamily I member 1
OR1L4	olfactory receptor family 1 subfamily L member 4
OR1N1	olfactory receptor family 1 subfamily N member 1
OR2A14	olfactory receptor family 2 subfamily A member 14
OR2K2	olfactory receptor family 2 subfamily K member 2
OR2M2	olfactory receptor family 2 subfamily M member 2
OR3A3	olfactory receptor family 3 subfamily A member 3
OR4D10	olfactory receptor family 4 subfamily D member 10
OR4F15	olfactory receptor family 4 subfamily F member 15
OR5M8	olfactory receptor family 5 subfamily M member 8
OR5R1	olfactory receptor family 5 subfamily R member 1 (gene/pseudogene)
OR6C3	olfactory receptor family 6 subfamily C member 3
OR7A10	olfactory receptor family 7 subfamily A member 10
OR8A1	olfactory receptor family 8 subfamily A member 1
OR8H2	olfactory receptor family 8 subfamily H member 2
OSR2	odd-skipped related transciption factor 2
OTOP1	otopetrin 1
OTUD4	OTU deubiquitinase 4
P2RX3	purinergic receptor P2X 3
P2RX6P	purinergic receptor P2X 6 pseudogene
P4HA3	prolyl 4-hydroxylase subunit alpha 3
PABPC5	poly(A) binding protein cytoplasmic 5
PAH	phenylalanine hydroxylase
PCDH7	protocadherin 7
PCDHB1	protocadherin beta 1
PCDHGA1	protocadherin gamma subfamily A, 1
PDE11A	phosphodiesterase 11A
PDE9A	phosphodiesterase 9A
PDZD11	PDZ domain containing 11
PHF2	PHD finger protein 2
PHKA1	phosphorylase kinase regulatory subunit alpha 1
PHLDB1	pleckstrin homology like domain family B member 1
PITX2	paired like homeodomain 2
PKP1	plakophilin 1
PLAT	plasminogen activator, tissue type
PLEC	plectin
PLEKHM1	pleckstrin homology and RUN domain containing M1
PMCHL1	pro-melanin concentrating hormone like 1 (pseudogene)
PNLIPRP1	pancreatic lipase related protein 1
POGZ	pogo transposable element derived with ZNF domain
POMT1	protein O-mannosyltransferase 1
POTEB/POTEB2	POTE ankyrin domain family member B2
PPARGC1A	PPARG coactivator 1 alpha
PPCDC	phosphopantothenoylcysteine decarboxylase
PPIP5K2	diphosphoinositol pentakisphosphate kinase 2
PRAME	preferentially expressed antigen in melanoma
PRAMEF10	PRAME family member 10
PRTG	protogenin
PTH2R	parathyroid hormone 2 receptor
PTPRE	protein tyrosine phosphatase receptor type E
PURG	purine rich element binding protein G
RAB3C	RAB3C, member RAS oncogene family
RAD51D	RAD51 paralog D
RASGRP2	RAS guanyl releasing protein 2
RASL12	RAS like family 12
RASL10A	RAS like family 10 member A
RASL11A	RAS like family 11 member A
RASSF1	Ras association domain family member 1
RAVER2	ribonucleoprotein, PTB binding 2
RGS11	regulator of G protein signaling 11
RGS12	regulator of G protein signaling 12
RGS13	regulator of G protein signaling 13
RHBDF2	rhomboid 5 homolog 2
RHOJ	ras homolog family member J
RPS6KA2	ribosomal protein S6 kinase A2
RREB1	ras responsive element binding protein 1
RSPH14	radial spoke head 14 homolog
RUFY1	RUN and FYVE domain containing 1
RUNX1T1	RUNX1 partner transcriptional co-repressor 1
S100A6	S100 calcium binding protein A6
SATB1	SATB homeobox 1
SCGB1D1	secretoglobin family 1D member 1
SCML1	Scm polycomb group protein like 1
SCN5A	sodium voltage-gated channel alpha subunit 5
SEMA6D	semaphorin 6D
SERPINA9	serpin family A member 9
SHH	sonic hedgehog signaling molecule
SIGIRR	single Ig and TIR domain containing
SIX1	SIX homeobox 1
SKP1	S-phase kinase associated protein 1
SLC22A1	solute carrier family 22 member 1
SLC38A3	solute carrier family 38 member 3
SLC6A11	solute carrier family 6 member 11
SOD3	superoxide dismutase 3
SPAG11B	sperm associated antigen 11B
SPATA7	spermatogenesis associated 7
SPATA21	spermatogenesis associated 21
SPRR3	small proline rich protein 3
SPTB	spectrin beta, erythrocytic
STARD13	StAR related lipid transfer domain containing 13
SYNE2	spectrin repeat containing nuclear envelope protein 2
SZT2	SZT2 subunit of KICSTOR complex
TAFA5	TAFA chemokine like family member 5
TAS2R42	taste 2 receptor member 42
TBATA	thymus, brain and testes associated
TBC1D14	TBC1 domain family member 14
TERF1	telomeric repeat binding factor 1
TERF2IP	TERF2 interacting protein
TET1	tet methylcytosine dioxygenase 1
TFAP2B	transcription factor AP-2 beta
TFPI	tissue factor pathway inhibitor
THSD1	thrombospondin type 1 domain containing 1
TINAGL1	tubulointerstitial nephritis antigen like 1
TMEM102	transmembrane protein 102
TMEM119	transmembrane protein 119
TMPO	thymopoietin
TMPRSS11A	transmembrane serine protease 11A
TMTC1	transmembrane O-mannosyltransferase targeting cadherins 1
TNFRSF8	TNF receptor superfamily member 8
TNFSF13	TNF superfamily member 13
TNRC6B	trinucleotide repeat containing adaptor 6B
TPD52L1	TPD52 like 1
TPTE2	transmembrane phosphoinositide 3-phosphatase and tensin homolog 2
TRIM16	tripartite motif containing 16
TRPM1	transient receptor potential cation channel subfamily M member 1
TRPM5	transient receptor potential cation channel subfamily M member 5
TTC25	tetratricopeptide repeat domain 25
TTC23L	tetratricopeptide repeat domain 23 like
TTC9B	tetratricopeptide repeat domain 9B
TTLL2	tubulin tyrosine ligase like 2
TTYH1	tweety family member 1
UBE2MP1	ubiquitin conjugating enzyme E2 M pseudogene 1
UBE2W	ubiquitin conjugating enzyme E2 W
UBTF	upstream binding transcription factor
UGT3A2	UDP glycosyltransferase family 3 member A2
ULBP3	UL16 binding protein 3
ULK1	unc-51 like autophagy activating kinase 1
WFDC5	WAP four-disulfide core domain 5
WWP1	WW domain containing E3 ubiquitin protein ligase 1
ZBED2	zinc finger BED-type containing 2
ZDHHC4	zinc finger DHHC-type palmitoyltransferase 4
ZDHHC11	zinc finger DHHC-type containing 11
ZFP64	ZFP64 zinc finger protein
ZMYND11	zinc finger MYND-type containing 11
ZNF117	zinc finger protein 117
ZNF142	zinc finger protein 142
ZNF219	zinc finger protein 219
ZNF284	zinc finger protein 284
ZNF777	zinc finger protein 777
ZNF804A	zinc finger protein 804A
ZP1	zona pellucida glycoprotein 1
