# Supplementary material for: Phenotypic Subtyping and Re-analyses of Existing Transcriptomic Data from Autistic Probands in Simplex Families Reveal Differentially Expressed and ASD Trait-Associated Genes
Source: Front Neurol. 2020 Nov 12;11:578972. doi: 10.3389/fneur.2020.578972 (PMC7689346; doi:10.3389/fneur.2020.578972)
Supplement: Supplementary Table 8 — All significant over-represented canonical pathways associated with module genes corresponding to verbal, non-verbal, social, and all (combined) traits in the simplex population. [file Table_8.xlsx]

## Sheet: Verbal
Table S8. Canonical pathways associated with autistic traits in the simplex population
Ingenuity Canonical Pathways	-log(p-value)*	Molecules
Regulation of eIF4 and p70S6K Signaling	5.07	EIF3A,EIF3M,EIF4E,PABPC1,PIK3C3,PPP2CB,PPP2R5C,RAP1B,RPS15A,RPS24,RPS28,RRAS2
Assembly of RNA Polymerase II Complex	4.94	CCNH,ERCC3,GTF2H2,MNAT1,POLR2J2/POLR2J3,POLR2K,TAF9
ERK/MAPK Signaling	4.86	ATF1,EIF4E,ETS1,MAPKAPK5,PAK2,PIK3C3,PPP2CB,PPP2R5C,PRKCI,RAP1B,RRAS2,VRK2,YWHAG
EIF2 Signaling	4.86	EIF3A,EIF3M,EIF4E,PABPC1,PIK3C3,RAP1B,RPL14,RPL23,RPL35,RPL5,RPS15A,RPS24,RPS28,RRAS2
Nucleotide Excision Repair Pathway	4.83	CCNH,ERCC3,GTF2H2,MNAT1,POLR2J2/POLR2J3,POLR2K
NER Pathway	4.35	CCNH,CUL4A,ERCC3,GTF2H2,LIG4,MNAT1,PCNA,POLR2J2/POLR2J3,POLR2K
Mitotic Roles of Polo-Like Kinase	4.14	CCNB1,CDK1,FBXO5,KIF11,PPP2CB,PPP2R5C,SMC3
3-phosphoinositide Biosynthesis	3.95	DUSP11,HACD2,MINPP1,MTMR6,NUDT15,PI4K2B,PIK3C3,PPP3CA,PTPN22,SACM1L,SYNJ1
Senescence Pathway	3.87	CAT,CCNB1,CDK1,EIF4E,ETS1,MAPKAPK5,PCGF6,PIK3C3,PPP2CB,PPP2R5C,PPP3CA,RAP1B,RRAS2,ZFP36L1
mTOR Signaling	3.82	EIF3A,EIF3M,EIF4E,PIK3C3,PPP2CB,PPP2R5C,PRKCI,RAP1B,RPS15A,RPS24,RPS28,RRAS2
Adipogenesis pathway	3.57	CCNH,ERCC3,GTF2H2,HAT1,HDAC2,MNAT1,RBBP4,RBBP7,SAP30L
Rac Signaling	3.36	ACTR3,ARPC5,IQGAP1,PAK2,PIK3C3,PRKCI,RAP1B,RRAS2
D-myo-inositol (1,4,5,6)-Tetrakisphosphate Biosynthesis	3.28	DUSP11,HACD2,MINPP1,MTMR6,NUDT15,PPP3CA,PTPN22,SACM1L,SYNJ1
D-myo-inositol (3,4,5,6)-tetrakisphosphate Biosynthesis	3.28	DUSP11,HACD2,MINPP1,MTMR6,NUDT15,PPP3CA,PTPN22,SACM1L,SYNJ1
Superpathway of Inositol Phosphate Compounds	3.11	DUSP11,HACD2,MINPP1,MTMR6,NUDT15,PI4K2B,PIK3C3,PPP3CA,PTPN22,SACM1L,SYNJ1
3-phosphoinositide Degradation	3	DUSP11,HACD2,MINPP1,MTMR6,NUDT15,PPP3CA,PTPN22,SACM1L,SYNJ1
D-myo-inositol-5-phosphate Metabolism	2.98	DUSP11,HACD2,MINPP1,MTMR6,NUDT15,PPP3CA,PTPN22,SACM1L,SYNJ1
Telomerase Signaling	2.85	ETS1,HDAC2,PIK3C3,PPP2CB,PPP2R5C,RAP1B,RRAS2
Cyclins and Cell Cycle Regulation	2.79	CCNB1,CCNH,CDK1,HDAC2,PPP2CB,PPP2R5C
Hereditary Breast Cancer Signaling	2.76	CCNB1,CDK1,HDAC2,PIK3C3,POLR2J2/POLR2J3,POLR2K,RAP1B,RRAS2
Renal Cell Carcinoma Signaling	2.76	ETS1,FH,PAK2,PIK3C3,RAP1B,RRAS2
Role of CHK Proteins in Cell Cycle Checkpoint Control	2.72	ATMIN,CDK1,PCNA,PPP2CB,PPP2R5C
CTLA4 Signaling in Cytotoxic T Lymphocytes	2.58	B2M,CLTC,PIK3C3,PPP2CB,PPP2R5C,PTPN22
Glucocorticoid Receptor Signaling	2.55	CCNH,ERCC3,GTF2H2,MED1,MNAT1,PIK3C3,POLR2J2/POLR2J3,POLR2K,PPP3CA,RAP1B,RRAS2,SUMO1,TAF9
RAN Signaling	2.52	KPNA2,KPNB1,RANBP1
GADD45 Signaling	2.52	CCNB1,CDK1,PCNA
fMLP Signaling in Neutrophils	2.5	ACTR3,ARPC5,PIK3C3,PPP3CA,PRKCI,RAP1B,RRAS2
Systemic Lupus Erythematosus Signaling	2.44	HNRNPA2B1,HNRNPC,LSM14A,LSM5,LSM6,PIK3C3,PRPF38A,RAP1B,RNPC3,RRAS2
ATM Signaling	2.39	ATF1,CCNB1,CDK1,PPP2CB,PPP2R5C,SMC3
Protein Ubiquitination Pathway	2.37	B2M,DNAJC10,HSPE1,PSMA3,SACS,UBE2D2,UBE2E1,UBE2Q2,UBE2V1,UBE4A,USP8
ErbB4 Signaling	2.36	APH1A,PIK3C3,PRKCI,RAP1B,RRAS2
GM-CSF Signaling	2.31	ETS1,PIK3C3,PPP3CA,RAP1B,RRAS2
p70S6K Signaling	2.28	PIK3C3,PPP2CB,PPP2R5C,PRKCI,RAP1B,RRAS2,YWHAG
Actin Nucleation by ARP-WASP Complex	2.28	ACTR3,ARPC5,RAP1B,RRAS2,WIPF1
Hypoxia Signaling in the Cardiovascular System	2.23	SUMO1,UBE2D2,UBE2E1,UBE2Q2,UBE2V1
Androgen Signaling	2.21	CCNH,ERCC3,GTF2H2,MNAT1,POLR2J2/POLR2J3,POLR2K,PRKCI
Cell Cycle: G2/M DNA Damage Checkpoint Regulation	2.16	CCNB1,CDK1,CKS2,YWHAG
Sumoylation Pathway	2.15	ETS1,HDAC2,PCNA,SP3,SUMO1,SUMO2
IL-3 Signaling	2.11	PIK3C3,PPP3CA,PRKCI,RAP1B,RRAS2
Virus Entry via Endocytic Pathways	2.07	B2M,CLTC,PIK3C3,PRKCI,RAP1B,RRAS2
LPS-stimulated MAPK Signaling	2.04	ATF1,PIK3C3,PRKCI,RAP1B,RRAS2
UDP-N-acetyl-D-galactosamine Biosynthesis II	2.04	GNPNAT1,HK2,UAP1
Prolactin Signaling	2	NMI,PIK3C3,PRKCI,RAP1B,RRAS2
IL-4 Signaling	1.94	IRF4,PIK3C3,RAP1B,RRAS2,SYNJ1
Phagosome Maturation	1.92	B2M,CTSO,PIK3C3,TUBA4A,TUBD1,VPS39,VTI1B
Inhibition of ARE-Mediated mRNA Degradation Pathway	1.92	EXOSC3,EXOSC9,PPP2CB,PPP2R5C,YWHAG,ZFP36L1
Ceramide Signaling	1.84	PIK3C3,PPP2CB,PPP2R5C,RAP1B,RRAS2
14-3-3-mediated Signaling	1.81	PIK3C3,PRKCI,RAP1B,RRAS2,TUBA4A,YWHAG
ErbB Signaling	1.81	PAK2,PIK3C3,PRKCI,RAP1B,RRAS2
Xenobiotic Metabolism Signaling	1.8	CAT,HS2ST1,MED1,PIK3C3,PPP2CB,PPP2R5C,PRKCI,RAP1B,RRAS2,SUMO1
Cdc42 Signaling	1.78	ACTR3,ARPC5,B2M,IQGAP1,PAK2,PRKCI,WIPF1
DNA Methylation and Transcriptional Repression Signaling	1.77	HDAC2,RBBP4,RBBP7
p53 Signaling	1.74	CASP6,MED1,PCNA,PIK3C3,PMAIP1
FAK Signaling	1.74	HMMR,PAK2,PIK3C3,RAP1B,RRAS2
Germ Cell-Sertoli Cell Junction Signaling	1.71	IQGAP1,PAK2,PIK3C3,RAB8B,RAP1B,RRAS2,TUBA4A
Regulation of Cellular Mechanics by Calpain Protease	1.71	CAST,CDK1,RAP1B,RRAS2
Thrombopoietin Signaling	1.69	PIK3C3,PRKCI,RAP1B,RRAS2
Remodeling of Epithelial Adherens Junctions	1.67	ACTR3,ARPC5,IQGAP1,TUBA4A
PI3K/AKT Signaling	1.64	EIF4E,PPP2CB,PPP2R5C,RAP1B,RRAS2,SYNJ1,YWHAG
PI3K Signaling in B Lymphocytes	1.61	ATF1,PIK3AP1,PPP3CA,PRKCI,RAP1B,RRAS2
Ephrin Receptor Signaling	1.61	ACTR3,ARPC5,EFNB2,PAK2,RAP1B,RRAS2,WIPF1
IGF-1 Signaling	1.6	PIK3C3,PRKCI,RAP1B,RRAS2,YWHAG
Insulin Receptor Signaling	1.57	EIF4E,PIK3C3,PRKCI,RAP1B,RRAS2,SYNJ1
UDP-N-acetyl-D-glucosamine Biosynthesis II	1.55	GNPNAT1,UAP1
NRF2-mediated Oxidative Stress Response	1.54	ABCC4,CAT,DNAJC10,PIK3C3,PRKCI,RAP1B,RRAS2
Glioma Invasiveness Signaling	1.53	HMMR,PIK3C3,RAP1B,RRAS2
B Cell Receptor Signaling	1.53	ETS1,PIK3AP1,PIK3C3,PPP3CA,RAP1B,RRAS2,SYNJ1
Macropinocytosis Signaling	1.51	PIK3C3,PRKCI,RAP1B,RRAS2
Spliceosomal Cycle	1.51	U2AF1/U2AF1L5
Angiopoietin Signaling	1.5	PAK2,PIK3C3,RAP1B,RRAS2
HGF Signaling	1.49	ETS1,PIK3C3,PRKCI,RAP1B,RRAS2
Epithelial Adherens Junction Signaling	1.48	ACTR3,ARPC5,IQGAP1,RAP1B,RRAS2,TUBA4A
Granzyme A Signaling	1.46	ANP32A,HMGB2
DNA damage-induced 14-3-3σ Signaling	1.46	CCNB1,CDK1
Erythropoietin Signaling	1.46	PIK3C3,PRKCI,RAP1B,RRAS2
FLT3 Signaling in Hematopoietic Progenitor Cells	1.44	EIF4E,PIK3C3,RAP1B,RRAS2
Huntington's Disease Signaling	1.44	CASP6,CLTC,HDAC2,PIK3C3,POLR2J2/POLR2J3,POLR2K,PRKCI,VTI1B
RAR Activation	1.42	CCNH,ERCC3,GTF2H2,MED1,MNAT1,PRKCI,RDH11
Role of Tissue Factor in Cancer	1.42	EIF4E,FGA,PIK3C3,RAP1B,RRAS2
Natural Killer Cell Signaling	1.41	B2M,CD48,PAK2,PIK3C3,RAP1B,RRAS2,WIPF1
NF-κB Activation by Viruses	1.39	PIK3C3,PRKCI,RAP1B,RRAS2
HER-2 Signaling in Breast Cancer	1.38	PIK3C3,PRKCI,RAP1B,RRAS2
Fc Epsilon RI Signaling	1.37	PIK3C3,PRKCI,RAP1B,RRAS2,SYNJ1
UVC-Induced MAPK Signaling	1.35	PRKCI,RAP1B,RRAS2
HIPPO signaling	1.35	PPP2CB,PPP2R5C,SAV1,YWHAG
Glutamate Removal from Folates	1.34	GGH
Melanoma Signaling	1.33	PIK3C3,RAP1B,RRAS2
UVB-Induced MAPK Signaling	1.33	EIF4E,PIK3C3,PRKCI
Gap Junction Signaling	1.33	PIK3C3,PPP3CA,PRKCI,RAP1B,RRAS2,SP3,TUBA4A
Aldosterone Signaling in Epithelial Cells	1.32	DNAJC10,HSPE1,PIK3C3,PRKCI,SACS,SLC12A2
Renin-Angiotensin Signaling	1.32	PAK2,PIK3C3,PRKCI,RAP1B,RRAS2
Molecular Mechanisms of Cancer	1.32	APH1A,CASP6,CDK1,HAT1,NLK,PAK2,PIK3C3,PMAIP1,PRKCI,RAP1B,RRAS2
Integrin Signaling	1.3	ACTR3,ARPC5,PAK2,PIK3C3,RAP1B,RRAS2,WIPF1
*Negative logarithm of the Fisher Exact p-value which represents the probability that the pathway is not over-represented among the respective dataset of genes, where a value of 1.3 is equivalent to a p-value of 0.05.

## Sheet: Nonverbal
Ingenuity Canonical Pathways	-log(p-value)*	Molecules
ATM Signaling	13.3	ABL1,ATF1,ATF2,ATF4,ATM,BID,BLM,BRAT1,BRCA1,CCNB1,CDC25A,CDC25C,CDK1,CDKN1A,CHEK2,CREB1,CREB3,CREBBP,FANCD2,GADD45A,GADD45B,GADD45G,H2AX,HP1BP3,KAT5,MDM2,MDM4,MRE11,NBN,PPP1CC,PPP2CB,PPP2R1B,PPP2R2A,PPP2R2B,PPP2R2C,PPP2R3B,PPP2R5A,PPP2R5D,PTPA,RAD17,RAD9A,RBBP8,SMC2,SMC3,SUV39H1,TDP1,TLK2,TP53BP1,USP7,ZEB1
Molecular Mechanisms of Cancer	11.1	ABL1,ADCY2,ADCY3,ADCY7,AKT1,APH1A,ARHGEF1,ARHGEF12,ARHGEF16,ARHGEF17,ARHGEF2,ARHGEF6,ARHGEF7,ARHGEF9,ATM,AXIN1,BAX,BBC3,BCL2,BID,BIRC3,BMP4,BMP6,BMPR2,BRAF,BRCA1,CAMK2B,CAMK2D,CAMK2G,CASP8,CCNE1,CCNE2,CDC25A,CDC25C,CDC42,CDK1,CDK13,CDK17,CDK19,CDK4,CDK5,CDK7,CDK8,CDK9,CDKN1A,CDKN2A,CFLAR,CHEK2,CREBBP,CRK,CTNNB1,CTNND1,DIABLO,E2F2,E2F3,E2F5,FADD,FANCD2,FAS,FOS,FZD1,GAB1,GAB2,GNA12,GNA13,GNAI1,GNAI…
Senescence Pathway	10.1	ACVR1B,ACVR2B,AKT1,ANAPC1,ANAPC11,ATF3,ATM,BMPR2,BRAF,CACNA1C,CALM1 (includes others),CALML5,CAPN1,CAPN10,CAPN3,CAT,CBX2,CCNB1,CDC25A,CDC25C,CDK1,CDK4,CDKN1A,CDKN2A,CHEK2,CREBBP,DHCR24,E2F2,E2F3,E2F5,EED,EIF4E,ELF2,GADD45A,GADD45B,GADD45G,HBP1,HIPK2,HRAS,ING1,ITPR2,ITPR3,MAP2K3,MAP3K7,MAPK15,MAPK3,MAPK6,MAPKAPK3,MCU,MDM2,MRE11,NBN,NF1,NFAT5,NFATC1,NFATC3,NRAS,PARP1,PCGF1,PCGF6,PDHA1,PHF1,PHF19,PI…
Hypoxia Signaling in the Cardiovascular System	8.84	AKT1,ATF2,ATF4,ATM,CDC34,COPS5,CREB1,CREB3,CREBBP,HIF1A,HIF1AN,HSP90AB1,LDHA,MDM2,NFKBIB,NFKBID,SUMO1,UBE2A,UBE2D1,UBE2D2,UBE2D3,UBE2D4,UBE2G1,UBE2G2,UBE2I,UBE2J1,UBE2J2,UBE2L3,UBE2L6,UBE2M,UBE2N,UBE2Q1,UBE2T,UBE2V1,UBE2Z,VEGFA
Regulation of eIF4 and p70S6K Signaling	8.35	AGO3,AKT1,EIF1,EIF2A,EIF2B1,EIF2B5,EIF2S1,EIF3B,EIF3C,EIF3H,EIF3L,EIF3M,EIF4A1,EIF4A2,EIF4A3,EIF4E,EIF4G1,EIF4G2,GRB2,HRAS,ITGA4,ITGB1,MAPK3,MKNK1,NRAS,PAIP2,PDPK1,PIK3C2A,PIK3C2B,PIK3C3,PIK3R1,PIK3R2,PIK3R5,PPP2CB,PPP2R1B,PPP2R2A,PPP2R2B,PPP2R2C,PPP2R3B,PPP2R5A,PPP2R5D,PRKCZ,PTPA,RAF1,RPS13,RPS16,RPS17,RPS19,RPS2,RPS20,RPS27,RPS27A,RPS29,RPS3,RPS4Y1,RPSA,RRAS2,SHC1,SOS1,SOS2
Cyclins and Cell Cycle Regulation	7.53	ABL1,ATM,BTRC,CCNA2,CCNB1,CCNE1,CCNE2,CCNH,CDC25A,CDK1,CDK4,CDK7,CDKN1A,CDKN2A,E2F2,E2F3,E2F5,FBXL5,HDAC2,HDAC4,HDAC8,HDAC9,MYT1,PPP2CB,PPP2R1B,PPP2R2A,PPP2R2B,PPP2R2C,PPP2R3B,PPP2R5A,PPP2R5D,PTPA,RAF1,SIN3A,SKP2,SUV39H1
Protein Ubiquitination Pathway	7.5	AMFR,ANAPC1,ANAPC11,BIRC3,BRCA1,BTRC,CDC20,CDC34,CRYAB,CUL2,DNAJB1,DNAJB12,DNAJB14,DNAJB6,DNAJB9,DNAJC15,DNAJC17,DNAJC18,DNAJC19,DNAJC21,DNAJC25,DNAJC27,DNAJC3,DNAJC5,HLA-F,HSP90AB1,HSPA1A/HSPA1B,HSPA1L,HSPA4,HSPA4L,HSPA9,HSPB6,HSPE1,HSPH1,MDM2,NEDD4,PSMA2,PSMA3,PSMB10,PSMB4,PSMB8,PSMC3,PSMC5,PSMD5,PSMD6,PSMD8,PSME1,RPS27A,SACS,SASS6,SKP2,TRAF6,UBE2A,UBE2D1,UBE2D2,UBE2D3,UBE2D4,UBE2G1,UBE2G2,UBE2…
mTOR Signaling	7.48	AKT1,CDC42,EIF3B,EIF3C,EIF3H,EIF3L,EIF3M,EIF4A1,EIF4A2,EIF4A3,EIF4B,EIF4E,EIF4G1,EIF4G2,GNB1L,HIF1A,HRAS,INSR,MAPK3,NRAS,PDPK1,PGF,PIK3C2A,PIK3C2B,PIK3C3,PIK3R1,PIK3R2,PIK3R5,PLD3,PPP2CB,PPP2R1B,PPP2R2A,PPP2R2B,PPP2R2C,PPP2R3B,PPP2R5A,PPP2R5D,PRKAA1,PRKAB1,PRKAB2,PRKCD,PRKCE,PRKCI,PRKCZ,PTPA,RAC1,RHEB,RHOT1,RHOV,RND2,RPS13,RPS16,RPS17,RPS19,RPS2,RPS20,RPS27,RPS27A,RPS29,RPS3,RPS4Y1,RPS6KA3,RPS6KA…
Ephrin Receptor Signaling	7.21	ABI1,ABL1,ACP1,ACTR3,AKT1,ARPC2,ARPC5,ATF2,ATF4,AXIN1,CDC42,CFL1,CFL2,CREB1,CREB3,CREBBP,CRK,CRKL,EFNA1,EFNA4,EPHA5,EPHA6,EPHB2,FGF1,GNA12,GNA13,GNAI1,GNAI2,GNAO1,GNAS,GNB1L,GNG3,GRB2,GRIN2B,GRINA,HRAS,ITGA4,ITGB1,KALRN,LIMK1,LIMK2,MAPK3,NCK1,NCK2,NRAS,PAK2,PGF,RAC1,RAF1,RASA1,ROCK1,RRAS2,SDCBP,SHC1,SOS1,SOS2,SRC,STAT3,VEGFA,VEGFB,WAS,WASL,WIPF1
Huntington's Disease Signaling	6.9	AKT1,ARFIP2,ATF2,ATF4,ATP5F1B,ATP5MC1,BAX,BDNF,CAPN1,CAPN10,CAPN3,CASP4,CASP8,CDK5,CLTC,CREB1,CREB3,CREBBP,CTSD,DCTN1,DNAJB1,DNAJC5,DNM1L,GNB1L,GNG3,GRB2,GRIN2B,HDAC2,HDAC4,HDAC8,HDAC9,HRAS,HSPA1A/HSPA1B,HSPA1L,HSPA4,HSPA9,ITPR1,MAPK3,NAPB,NAPG,NCOR1,NCOR2,PDPK1,PIK3C2A,PIK3C2B,PIK3C3,PIK3R1,PIK3R2,PIK3R5,PLCB3,POLR2B,POLR2C,POLR2F,POLR2H,POLR2J2/POLR2J3,POLR2K,PRKCD,PRKCE,PRKCI,PRKCZ,PSME1,PSME3…
Estrogen Receptor Signaling	6.8	ADCY2,ADCY3,ADCY7,AKT1,ATF2,ATF4,ATP5MC1,BCL2,CACNA1C,CDK8,CDKN1A,CFL1,CFL2,CREB1,CREB3,CREBBP,CTBP1,EIF2B1,EIF2B5,EIF4E,FBXO32,FOS,GNA12,GNA13,GNAI1,GNAI2,GNAO1,GNAS,GPER1,GRB2,HIF1A,HNRNPD,HRAS,HSP90AB1,JAK1,LEPR,LIMK1,LIMK2,MAPK3,MCU,MDK,MED10,MED13,MED15,MED16,MED23,MED24,MED4,MMP1,MMP14,MMP16,NCOA2,NCOA3,NCOR1,NCOR2,NOTCH1,NR3C1,NRAS,NRIP1,PCNA,PDIA3,PGF,PIK3C2A,PIK3C2B,PIK3C3,PIK3R1,PIK3R2,…
Hereditary Breast Cancer Signaling	6.62	AKT1,ATM,BLM,BRCA1,CCNB1,CDC25C,CDK1,CDK4,CDKN1A,CHEK2,CREBBP,DDB2,FAAP100,FANCC,FANCD2,FANCG,GADD45A,GADD45B,GADD45G,H2AX,HDAC2,HDAC4,HDAC8,HDAC9,HRAS,MLH1,MRE11,NBN,NRAS,PIK3C2A,PIK3C2B,PIK3C3,PIK3R1,PIK3R2,PIK3R5,POLR2B,POLR2C,POLR2F,POLR2H,POLR2J2/POLR2J3,POLR2K,RFC2,RFC3,RPS27A,RRAS2,SMARCA4,SMARCC2,SMARCD2,SMARCD3,TUBG1,XPC
p53 Signaling	6.53	AKT1,ATM,BAX,BBC3,BCL2,BIRC5,BRCA1,CDK4,CDKN1A,CDKN2A,CHEK2,COQ8A,CTNNB1,FAS,GADD45A,GADD45B,GADD45G,GML,GNL3,HDAC9,HIF1A,HIPK2,JMY,MDM2,MDM4,PCNA,PIAS1,PIK3C2A,PIK3C2B,PIK3C3,PIK3R1,PIK3R2,PIK3R5,PML,PRKDC,SCO2,TP53I3,TP53INP1,TRIM29
EIF2 Signaling	6.51	AGO3,AKT1,ATF3,ATF4,BCL2,DDIT3,EIF1,EIF2A,EIF2AK2,EIF2B1,EIF2B5,EIF2S1,EIF3B,EIF3C,EIF3H,EIF3L,EIF3M,EIF4A1,EIF4A2,EIF4A3,EIF4E,EIF4G1,EIF4G2,EIF5,EIF5B,GRB2,HRAS,INSR,MAPK3,NRAS,PDPK1,PIK3C2A,PIK3C2B,PIK3C3,PIK3R1,PIK3R2,PIK3R5,PPP1CC,PPP1R15A,RAF1,RPL10,RPL11,RPL17,RPL18,RPL18A,RPL24,RPL3,RPL32,RPL38,RPL4,RPL41,RPL8,RPL9,RPS13,RPS16,RPS17,RPS19,RPS2,RPS20,RPS27,RPS27A,RPS29,RPS3,RPS4Y1,RPSA,RRA…
Role of CHK Proteins in Cell Cycle Checkpoint Control	6.49	ATM,BRCA1,CDC25A,CDC25C,CDK1,CDKN1A,CHEK2,E2F2,E2F3,E2F5,MRE11,NBN,PCNA,PPP2CB,PPP2R1B,PPP2R2A,PPP2R2B,PPP2R2C,PPP2R3B,PPP2R5A,PPP2R5D,PTPA,RAD17,RAD9A,RFC2,RFC3,TLK2
Reelin Signaling in Neurons	6.25	ACTR3,AKT1,APOE,ARHGEF1,ARHGEF12,ARHGEF16,ARHGEF2,ARHGEF6,ARHGEF9,ARPC2,ARPC5,CAMK2B,CAMK2D,CAMK2G,CDC42,CDK5,CFL1,CRK,CRKL,FGR,GRIN2B,GRINA,ITGA4,ITGAL,ITGB1,ITGB2,LCK,LIMK1,LYN,MAP2K3,MAP4K1,MAPK3,MAPK8IP3,NDEL1,NECTIN3,PAFAH1B3,PIK3C2A,PIK3C2B,PIK3C3,PIK3R1,PIK3R2,PIK3R5,RAC1,RELN,SRC,VLDLR,WASL
p70S6K Signaling	6.12	AGTR1,AKT1,BCAP31,BTK,CD79A,CD79B,F2R,F2RL3,GNAI1,GNAI2,GRB2,HRAS,JAK1,LYN,MAPK3,NRAS,PDIA3,PDPK1,PIK3C2A,PIK3C2B,PIK3C3,PIK3R1,PIK3R2,PIK3R5,PLCB3,PLCD1,PLCG2,PPP2CB,PPP2R1B,PPP2R2A,PPP2R2B,PPP2R2C,PPP2R3B,PPP2R5A,PPP2R5D,PRKCD,PRKCE,PRKCI,PRKCZ,PTPA,RAF1,RRAS2,SHC1,SOS1,SOS2,SRC,SYK,YWHAE
NGF Signaling	6.09	AKT1,ATF2,ATF4,BAX,CDC42,CREB1,CREB3,CREBBP,CRK,GAB1,GRB2,HRAS,MAP3K12,MAP3K4,MAP3K6,MAP3K7,MAP3K8,MAPK3,NGFR,NRAS,PDPK1,PIK3C2A,PIK3C2B,PIK3C3,PIK3R1,PIK3R2,PIK3R5,PLCG2,PRKCD,PRKCZ,RAC1,RAF1,RELA,ROCK1,RPS6KA3,RPS6KA4,RPS6KB2,RPS6KC1,RRAS2,SHC1,SMPD1,SOS1,SOS2,TRAF6
Cell Cycle Control of Chromosomal Replication	6.06	CDC45,CDC7,CDK1,CDK13,CDK17,CDK19,CDK4,CDK5,CDK7,CDK8,CDK9,CDT1,CHEK2,DBF4,LIG1,MCM3,MCM4,MCM5,MCM6,MCM7,PCNA,POLA1,POLA2,POLD1,RPA2,TOP2B
Prostate Cancer Signaling	5.95	ABL1,AKT1,AR,ATF2,ATF4,BCL2,CCNE1,CCNE2,CDKN1A,CREB1,CREB3,CREBBP,CTNNB1,GRB2,GSTP1,HRAS,HSP90AB1,KLK3,MAPK3,MDM2,NFKBIB,NFKBID,NRAS,PDPK1,PIK3C2A,PIK3C2B,PIK3C3,PIK3R1,PIK3R2,PIK3R5,RAF1,RELA,RRAS2,SIN3A,SOS1,SOS2,SUV39H1
Synaptogenesis Signaling Pathway	5.94	ACTR3,ADCY2,ADCY3,ADCY7,AKT1,AP1B1,AP2A1,AP2B1,AP2S1,APOE,ARHGEF7,ARPC2,ARPC5,ATF2,ATF4,BDNF,BRAF,CALM1 (includes others),CALML5,CAMK2B,CAMK2D,CAMK2G,CDC42,CDK5,CFL1,CLASP2,CREB1,CREB3,CREBBP,CRK,CRKL,CTNNB1,CTNND1,DNAJC5,EFNA1,EFNA4,EPHA5,EPHA6,EPHB2,FGR,GRB2,GRIA1,GRIN2B,GRINA,GRM2,HRAS,ITPR1,KALRN,LCK,LIMK1,LYN,MAPK3,NAPB,NAPG,NECTIN1,NECTIN3,NLGN3,NRAS,NRXN1,PIK3C2A,PIK3C2B,PIK3C3,PIK3R1,PIK3…
ERK/MAPK Signaling	5.92	ATF1,ATF2,ATF4,BRAF,CREB1,CREB3,CREBBP,CRK,CRKL,DUSP1,DUSP4,EIF4E,ELF2,FOS,GRB2,H3-3A/H3-3B,HRAS,ITGA4,ITGB1,KSR1,MAPK3,MKNK1,MKNK2,NFATC1,NRAS,PAK2,PIK3C2A,PIK3C2B,PIK3C3,PIK3R1,PIK3R2,PIK3R5,PLCG2,PPP1CC,PPP1R10,PPP1R14B,PPP1R3D,PPP1R7,PPP2CB,PPP2R1B,PPP2R2A,PPP2R2B,PPP2R2C,PPP2R3B,PPP2R5A,PPP2R5D,PRKCD,PRKCE,PRKCI,PTPA,RAC1,RAF1,RAPGEF3,RPS6KA4,RRAS2,SHC1,SOS1,SOS2,SRC,STAT1,STAT3,TLN1,VRK2
NER Pathway	5.84	CCNH,CDK7,CHAF1A,CHAF1B,COPS5,COPS7A,COPS7B,DDB1,DDB2,ERCC3,ERCC6,GPS1,GTF2H2,GTF2H3,H3-3A/H3-3B,H4C14,H4C3,LIG1,MNAT1,NEDD8,PCNA,POLA1,POLA2,POLD1,POLE2,POLR2B,POLR2C,POLR2F,POLR2H,POLR2J2/POLR2J3,POLR2K,RFC2,RFC3,RPA2,TCEA1,TOP2B,UBE2I,UBE2N,USP7,XPC
GADD45 Signaling	5.75	ATM,BRCA1,CCNB1,CCNE1,CCNE2,CDK1,CDK4,CDKN1A,GADD45A,GADD45B,GADD45G,MAP3K4,PCNA
PI3K Signaling in B Lymphocytes	5.7	ABL1,AKT1,ATF1,ATF2,ATF3,ATF4,BTK,C3,CALM1 (includes others),CALML5,CAMK2B,CAMK2D,CAMK2G,CD40,CD79A,CD79B,CR2,CREB1,FOS,HRAS,ITPR1,ITPR2,ITPR3,LYN,MAPK3,NFAT5,NFATC1,NFATC3,NFKBIB,NFKBID,NRAS,PDIA3,PDPK1,PIK3R1,PIK3R2,PLCB3,PLCD1,PLCG2,PLEKHA3,PPP3CA,PPP3CB,PPP3CC,PRKCI,PRKCZ,RAC1,RAF1,RELA,RRAS2,SYK
Cell Cycle: G2/M DNA Damage Checkpoint Regulation	5.54	ABL1,ATM,BORA,BRCA1,BTRC,CCNB1,CDC25C,CDK1,CDK7,CDKN1A,CDKN2A,CHEK2,CKS2,FBXL5,GADD45A,HIPK2,MDM2,MDM4,PRKDC,SKP2,TOP2B,TRIP12,YWHAE
EGF Signaling	5.53	AKT1,CSNK2A1,CSNK2A2,CSNK2B,FOS,GRB2,HRAS,ITPR1,ITPR2,ITPR3,JAK1,MAPK3,PIK3C2A,PIK3C2B,PIK3C3,PIK3R1,PIK3R2,PIK3R5,RAF1,RASA1,SHC1,SOS1,SOS2,SRC,STAT1,STAT3
Mitotic Roles of Polo-Like Kinase	5.51	ANAPC1,ANAPC11,CAPN1,CCNB1,CDC20,CDC25A,CDC25C,CDC7,CDK1,CHEK2,FBXO5,HSP90AB1,KIF11,PLK2,PLK3,PLK4,PPP2CB,PPP2R1B,PPP2R2A,PPP2R2B,PPP2R2C,PPP2R3B,PPP2R5A,PPP2R5D,PTPA,SLK,SMC3,STAG2
3-phosphoinositide Biosynthesis	5.45	ACP1,ACP6,ATP1A1,CDC25A,CDC25C,DOT1L,DUSP1,DUSP10,DUSP11,DUSP12,DUSP16,DUSP23,DUSP27,DUSP28,DUSP5,FIG4,MDP1,MINPP1,MTMR4,MTMR6,MTMR9,NOCT,NT5C,NUDT1,NUDT15,NUDT16,NUDT5,PDXP,PI4K2B,PI4KB,PIK3C2A,PIK3C2B,PIK3C3,PIK3R1,PIK3R2,PIK3R5,PIKFYVE,PLPP6,PPFIA1,PPIP5K1,PPP1CC,PPP1R14B,PPP1R16B,PPP1R1C,PPP1R7,PPP1R8,PPP2R5A,PPP2R5D,PPP3CA,PPP4R1,PPP5C,PPTC7,PTPA,PTPN1,PTPN2,RASA1,WBP11
Inhibition of ARE-Mediated mRNA Degradation Pathway	5.44	AGO3,AKT1,CD70,CNOT11,CNOT2,CNOT4,CNOT7,DCP1A,DIS3,DIS3L,EXOSC1,EXOSC10,EXOSC2,EXOSC3,EXOSC4,LTA,LTB,MAP3K7,MAPK15,MAPK3,MAPK6,NGFR,PAPOLA,PAPOLG,PARN,PPP2CB,PPP2R1B,PPP2R2A,PPP2R2B,PPP2R2C,PPP2R3B,PPP2R5A,PPP2R5D,PSME1,PSME3,PSME4,PTPA,TNF,TNFSF14,TNFSF9,YWHAE,ZFP36,ZFP36L1
SAPK/JNK Signaling	5.42	ATF2,CDC42,CRK,CRKL,DUSP10,DUSP4,FADD,GAB1,GADD45A,GNA12,GNA13,GRB2,HRAS,LCK,MAP3K12,MAP3K4,MAP3K7,MAP4K1,MAP4K5,MAPK8IP3,MINK1,NFATC1,NFATC3,NRAS,PIK3C2A,PIK3C2B,PIK3C3,PIK3R1,PIK3R2,PIK3R5,RAC1,RIPK1,RRAS2,SH2D2A,SHC1,SOS1,SOS2,TAB1
Melanocyte Development and Pigmentation Signaling	5.36	ADCY2,ADCY3,ADCY7,ATF2,ATF4,BCL2,CREB1,CREB3,CREBBP,CRK,GNAS,GRB2,HRAS,MAPK3,MC1R,MITF,NRAS,PAX3,PIK3C2A,PIK3C2B,PIK3C3,PIK3R1,PIK3R2,PIK3R5,PLCG2,RAF1,RPS6KA3,RPS6KA4,RPS6KB2,RPS6KC1,RRAS2,SH2B2,SHC1,SOS1,SOS2,SRC
D-myo-inositol-5-phosphate Metabolism	5.33	ACP1,ACP6,ATP1A1,CDC25A,CDC25C,DOT1L,DUSP1,DUSP10,DUSP11,DUSP12,DUSP16,DUSP23,DUSP27,DUSP28,DUSP5,FIG4,MDP1,MINPP1,MTMR4,MTMR6,MTMR9,NOCT,NT5C,NUDT1,NUDT15,NUDT16,NUDT5,PDXP,PIKFYVE,PIP4K2A,PLCB3,PLCD1,PLCG2,PLPP6,PPFIA1,PPIP5K1,PPP1CC,PPP1R14B,PPP1R16B,PPP1R1C,PPP1R7,PPP1R8,PPP2R5A,PPP2R5D,PPP3CA,PPP4R1,PPP5C,PPTC7,PTPA,PTPN1,PTPN2,RASA1,WBP11
D-myo-inositol (1,4,5,6)-Tetrakisphosphate Biosynthesis	5.22	ACP1,ACP6,ATP1A1,CDC25A,CDC25C,DOT1L,DUSP1,DUSP10,DUSP11,DUSP12,DUSP16,DUSP23,DUSP27,DUSP28,DUSP5,FIG4,MDP1,MINPP1,MTMR4,MTMR6,MTMR9,NOCT,NT5C,NUDT1,NUDT15,NUDT16,NUDT5,PDXP,PIKFYVE,PLPP6,PPFIA1,PPIP5K1,PPP1CC,PPP1R14B,PPP1R16B,PPP1R1C,PPP1R7,PPP1R8,PPP2R5A,PPP2R5D,PPP3CA,PPP4R1,PPP5C,PPTC7,PTPA,PTPN1,PTPN2,RASA1,WBP11
D-myo-inositol (3,4,5,6)-tetrakisphosphate Biosynthesis	5.22	ACP1,ACP6,ATP1A1,CDC25A,CDC25C,DOT1L,DUSP1,DUSP10,DUSP11,DUSP12,DUSP16,DUSP23,DUSP27,DUSP28,DUSP5,FIG4,MDP1,MINPP1,MTMR4,MTMR6,MTMR9,NOCT,NT5C,NUDT1,NUDT15,NUDT16,NUDT5,PDXP,PIKFYVE,PLPP6,PPFIA1,PPIP5K1,PPP1CC,PPP1R14B,PPP1R16B,PPP1R1C,PPP1R7,PPP1R8,PPP2R5A,PPP2R5D,PPP3CA,PPP4R1,PPP5C,PPTC7,PTPA,PTPN1,PTPN2,RASA1,WBP11
Sirtuin Signaling Pathway	5.16	ACSS2,AKT1,ARNTL,ATG10,ATG101,ATG16L1,ATG2A,ATG2B,ATG4A,ATG7,ATG9A,ATP5F1B,ATP5MC1,BAX,CPT1A,CRTC2,DOT1L,G6PD,GABPB2,GADD45A,GADD45B,GADD45G,GTF3C2,H1-1,H3-3A/H3-3B,HIF1A,HSF1,LDHA,MAP1LC3B,MAPK15,MAPK3,MAPK6,MLYCD,NAMPT,NBN,NDUFA7,NDUFA8,NDUFAF1,NDUFB10,NDUFS1,NDUFS3,NDUFS8,NEDD4,NR1H2,NR1H3,NR1H4,PAM16,PARP1,PCK2,PDHA1,POLR1C,POLR1D,POLR2F,POLR3D,PPARA,PRKAA1,PRKDC,RBBP8,RELA,RPTOR,SDHC,SIRT2,S…
3-phosphoinositide Degradation	5.06	ACP1,ACP6,ATP1A1,CDC25A,CDC25C,DOT1L,DUSP1,DUSP10,DUSP11,DUSP12,DUSP16,DUSP23,DUSP27,DUSP28,DUSP5,FIG4,INPP4A,MDP1,MINPP1,MTMR14,MTMR3,MTMR4,MTMR6,MTMR9,NOCT,NT5C,NUDT1,NUDT15,NUDT16,NUDT5,PDXP,PIKFYVE,PLPP6,PPFIA1,PPIP5K1,PPP1CC,PPP1R14B,PPP1R16B,PPP1R1C,PPP1R7,PPP1R8,PPP2R5A,PPP2R5D,PPP3CA,PPP4R1,PPP5C,PPTC7,PTPA,PTPN1,PTPN2,RASA1,WBP11
Role of BRCA1 in DNA Damage Response	5.04	ATF1,ATM,ATRIP,BABAM1,BABAM2,BLM,BRCA1,BRCC3,CDKN1A,CHEK2,E2F2,E2F3,E2F5,FAAP100,FANCC,FANCD2,FANCG,GADD45A,MLH1,MRE11,NBN,RBBP8,RBL2,RFC2,RFC3,SMARCA4,SMARCC2,SMARCD2,SMARCD3,STAT1,UIMC1
Endocannabinoid Cancer Inhibition Pathway	5.04	ADCY2,ADCY3,ADCY7,AKT1,ATF2,ATF3,ATF4,CASP4,CASP8,CCNE1,CCNE2,CDKN1A,CREB1,CREB3,CREBBP,CTNNB1,DDIT3,EIF2A,GNA13,GNAI1,GNAI2,GNAO1,GNB1L,GPR55,HIF1A,MAP2K3,MAPK3,PGF,PIK3C2A,PIK3C2B,PIK3C3,PIK3R1,PIK3R2,PIK3R5,PRKAA1,PRKAB1,PRKAB2,RAF1,ROCK1,RPTOR,SMPD1,SPTLC1,SRC,TCF7,TRIB3,TRPV1,TWIST1,VEGFA,VEGFB
Chronic Myeloid Leukemia Signaling	4.99	ABL1,AKT1,CDK4,CDKN1A,CDKN2A,CRK,CRKL,CTBP1,E2F2,E2F3,E2F5,GAB2,GRB2,HDAC2,HDAC4,HDAC8,HDAC9,HRAS,MAPK3,MDM2,NRAS,PIK3C2A,PIK3C2B,PIK3C3,PIK3R1,PIK3R2,PIK3R5,RAF1,RBL2,RELA,RRAS2,SIN3A,SMAD4,SOS1,SOS2,STAT5A,SUV39H1
Glucocorticoid Receptor Signaling	4.9	AKT1,AR,BCL2,BGLAP,CCNH,CDK7,CDKN1A,CREB1,CREBBP,CREBZF,DUSP1,ERCC3,FOS,GRB2,GTF2F1,GTF2H2,GTF2H3,HRAS,HSP90AB1,HSPA1A/HSPA1B,HSPA1L,HSPA4,HSPA9,ICAM1,JAK1,KRT10,KRT32,MAP3K7,MAPK3,MMP1,MNAT1,NCOA2,NCOA3,NCOR1,NCOR2,NFAT5,NFATC1,NFATC3,NFKBIB,NFKBID,NR3C1,NRAS,NRIP1,PCK2,PIK3C2A,PIK3C2B,PIK3C3,PIK3R1,PIK3R2,PIK3R5,PLAU,POLR2B,POLR2C,POLR2F,POLR2H,POLR2J2/POLR2J3,POLR2K,PPP3CA,PPP3CB,PPP3CC,PRKAA1…
Unfolded protein response	4.9	AMFR,ATF4,BCL2,CANX,CD82,DDIT3,DNAJB9,DNAJC3,EDEM1,EIF2A,ERN1,HSPA1A/HSPA1B,HSPA1L,HSPA4,HSPA9,HSPH1,MBTPS1,MBTPS2,OS9,PPP1R15A,SCAP,SREBF1,SREBF2,SYVN1
Superpathway of Inositol Phosphate Compounds	4.9	ACP1,ACP6,ATP1A1,CDC25A,CDC25C,DOT1L,DUSP1,DUSP10,DUSP11,DUSP12,DUSP16,DUSP23,DUSP27,DUSP28,DUSP5,FIG4,INPP5A,IP6K1,IP6K2,IPPK,ITPKA,MDP1,MINPP1,MTMR4,MTMR6,MTMR9,NOCT,NT5C,NUDT1,NUDT15,NUDT16,NUDT5,PDXP,PI4K2B,PI4KB,PIK3C2A,PIK3C2B,PIK3C3,PIK3R1,PIK3R2,PIK3R5,PIKFYVE,PIP4K2A,PLCB3,PLCD1,PLCG2,PLPP6,PPFIA1,PPIP5K1,PPP1CC,PPP1R14B,PPP1R16B,PPP1R1C,PPP1R7,PPP1R8,PPP2R5A,PPP2R5D,PPP3CA,PPP4R1,PPP5C,…
Cell Cycle: G1/S Checkpoint Regulation	4.84	ABL1,ATM,BMI1,BTRC,CCNE1,CCNE2,CDC25A,CDK4,CDKN1A,CDKN2A,E2F2,E2F3,E2F5,FBXL5,GNL3,HDAC2,HDAC4,HDAC8,HDAC9,MAX,MDM2,RBL2,RPL11,SIN3A,SKP2,SMAD4,SUV39H1
B Cell Receptor Signaling	4.82	ABL1,AKT1,ATF2,ATF4,BCL2A1,BTK,CALM1 (includes others),CALML5,CAMK2B,CAMK2D,CAMK2G,CD79A,CD79B,CDC42,CFL1,CFL2,CREB1,CREB3,CREBBP,GAB1,GAB2,GRB2,HRAS,LYN,MAP2K3,MAP3K12,MAP3K4,MAP3K6,MAP3K7,MAP3K8,MAPK3,NFAT5,NFATC1,NFATC3,NFKBIB,NFKBID,NRAS,PDPK1,PIK3C2A,PIK3C2B,PIK3C3,PIK3R1,PIK3R2,PIK3R5,PLCG2,PPP3CA,PPP3CB,PPP3CC,RAC1,RAF1,RASSF5,RELA,RPS6KB2,RRAS2,SHC1,SOS1,SOS2,SYK
GM-CSF Signaling	4.78	AKT1,BCL2A1,CAMK2B,CAMK2D,CAMK2G,GRB2,HRAS,LYN,MAPK3,NRAS,PIK3C2A,PIK3C2B,PIK3C3,PIK3R1,PIK3R2,PIK3R5,PIM1,PPP3CA,PPP3CB,PPP3CC,RACK1,RAF1,RRAS2,SHC1,SOS1,SOS2,STAT1,STAT3
IL-3 Signaling	4.7	AKT1,CRKL,FOS,GAB2,GRB2,HRAS,JAK1,MAPK3,NRAS,PIK3C2A,PIK3C2B,PIK3C3,PIK3R1,PIK3R2,PIK3R5,PPP3CA,PPP3CB,PPP3CC,PRKCD,PRKCE,PRKCI,PRKCZ,RAC1,RAF1,RRAS2,SHC1,SOS1,STAT1,STAT3,STAT5A
Clathrin-mediated Endocytosis Signaling	4.69	ACTR3,AP1B1,AP1M1,AP1S2,AP2A1,AP2B1,AP2S1,AP3M1,APOE,ARF6,ARPC2,ARPC5,ARRB1,CD2AP,CDC42,CLTC,CLU,CSNK2A1,CSNK2A2,CSNK2B,DNM1L,EPHB2,F2R,FGF1,FGF19,FGF20,FGF9,GRB2,ITGB1,ITGB2,MDM2,NUMB,PGF,PICALM,PIK3C2A,PIK3C2B,PIK3C3,PIK3R1,PIK3R2,PIK3R5,PON1,PPP3CA,PPP3CB,PPP3CC,RAB4B,RAB5B,RAB5C,RAB7A,RAC1,RPS27A,SERPINA1,SH3GLB2,SH3KBP1,SRC,STAM,USP9X,VEGFA,VEGFB,WASL
Aldosterone Signaling in Epithelial Cells	4.57	CRYAB,DNAJB1,DNAJB12,DNAJB14,DNAJB6,DNAJB9,DNAJC15,DNAJC17,DNAJC18,DNAJC19,DNAJC21,DNAJC25,DNAJC27,DNAJC3,DNAJC5,DUSP1,HSP90AB1,HSPA1A/HSPA1B,HSPA1L,HSPA4,HSPA4L,HSPA9,HSPB6,HSPE1,HSPH1,ITPR1,ITPR2,ITPR3,MAPK3,NEDD4,PDIA3,PDPK1,PIK3C2A,PIK3C2B,PIK3C3,PIK3R1,PIK3R2,PIK3R5,PIKFYVE,PLCB3,PLCD1,PLCG2,PRKCD,PRKCE,PRKCI,PRKCZ,RAF1,SACS,SASS6,SCNN1G,SOS1,SOS2
fMLP Signaling in Neutrophils	4.56	ACTR3,ARPC2,ARPC5,CALM1 (includes others),CALML5,CDC42,GNAI1,GNAI2,GNAS,GNB1L,GNG3,HRAS,ITPR1,ITPR2,ITPR3,MAPK3,NFAT5,NFATC1,NFATC3,NFKBIB,NFKBID,NRAS,PIK3C2A,PIK3C2B,PIK3C3,PIK3R1,PIK3R2,PIK3R5,PLCB3,PPP3CA,PPP3CB,PPP3CC,PRKCD,PRKCE,PRKCI,PRKCZ,RAC1,RAF1,RELA,RRAS2,WAS
Ceramide Signaling	4.51	AKT1,BCL2,CTSD,DIABLO,FOS,HRAS,KSR1,MAPK3,NGFR,NRAS,PIK3C2A,PIK3C2B,PIK3C3,PIK3R1,PIK3R2,PIK3R5,PPP2CB,PPP2R1B,PPP2R2A,PPP2R2B,PPP2R2C,PPP2R3B,PPP2R5A,PPP2R5D,PRKCZ,PTPA,RAF1,RELA,RRAS2,S1PR1,SMPD1,SPHK2,TNF
PDGF Signaling	4.51	ABL1,ABL2,ACP1,CAV3,CRK,CRKL,CSNK2A1,CSNK2A2,CSNK2B,EIF2AK2,FOS,GRB2,HRAS,JAK1,MAPK3,NRAS,PIK3C2A,PIK3C2B,PIK3C3,PIK3R1,PIK3R2,PIK3R5,PLCG2,RAF1,RASA1,RRAS2,SHC1,SOS1,SOS2,SPHK2,SRC,STAT1,STAT3
Neurotrophin/TRK Signaling	4.46	AKT1,ATF2,ATF4,BDNF,CDC42,CREB1,CREB3,CREBBP,FOS,GAB1,GRB2,HRAS,KLK3,MAP2K3,MAPK3,NGFR,NRAS,PDPK1,PIK3C2A,PIK3C2B,PIK3C3,PIK3R1,PIK3R2,PIK3R5,RAF1,RRAS2,SHC1,SOS1,SOS2,SPRY1
AMPK Signaling	4.43	ADRA1D,ADRA2B,AK2,AK3,AKT1,ATF2,ATF4,CCNA2,CDKN1A,CFTR,CHRNA5,CHRNA9,CHRNB3,CPT1A,CPT2,CREB1,CREB3,CREBBP,CRTC2,ELAVL1,FASN,GNAS,GNB1L,GYS1,HMGCR,INSR,MAP2K3,MAP3K7,MLYCD,ORAI1,PCK2,PFKFB2,PFKP,PIK3C2A,PIK3C2B,PIK3C3,PIK3R1,PIK3R2,PIK3R5,PPM1A,PPM1B,PPM1F,PPM1G,PPP2CB,PPP2R1B,PPP2R2A,PPP2R2B,PPP2R2C,PPP2R3B,PPP2R5A,PPP2R5D,PRKAA1,PRKAB1,PRKAB2,PTPA,RAB1A,RAB2A,RAB7A,RPTOR,SMARCA4,SMARCC2,SMARCD2,…
Role of NFAT in Regulation of the Immune Response	4.42	AKT1,ATF2,BTK,CALM1 (includes others),CALML5,CD79A,CD79B,CD80,CSNK1G1,CSNK1G3,FOS,GNA12,GNA13,GNAI1,GNAI2,GNAO1,GNAS,GNB1L,GNG3,GRB2,HLA-DMA,HLA-DMB,HRAS,ITPR1,ITPR2,ITPR3,LCK,LCP2,LYN,MAPK3,MEF2A,MEF2B,NFAT5,NFATC1,NFATC3,NFKBIB,NFKBID,NRAS,ORAI1,PIK3C2A,PIK3C2B,PIK3C3,PIK3R1,PIK3R2,PIK3R5,PLCB3,PLCG2,PPP3CA,PPP3CB,PPP3CC,RAF1,RELA,RRAS2,SOS1,SOS2,SYK
IL-2 Signaling	4.39	AKT1,CSNK2A1,CSNK2A2,CSNK2B,FOS,GRB2,HRAS,IL2RA,JAK1,LCK,MAPK3,NRAS,PIK3C2A,PIK3C2B,PIK3C3,PIK3R1,PIK3R2,PIK3R5,RAF1,RRAS2,SHC1,SOS1,SOS2,STAT5A,SYK
Integrin Signaling	4.34	ABL1,ACTN4,ACTR3,AKT1,ARF1,ARF5,ARF6,ARHGEF7,ARPC2,ARPC5,BRAF,CAPN1,CAPN10,CAPN3,CDC42,CRK,CRKL,GRB2,HRAS,ILK,ITGA4,ITGAL,ITGAV,ITGB1,ITGB2,LIMS1,MAPK3,NCK1,NCK2,NEDD9,NRAS,PAK2,PARVB,PFN1,PFN3,PFN4,PIK3C2A,PIK3C2B,PIK3C3,PIK3R1,PIK3R2,PIK3R5,PIKFYVE,PLCG2,RAC1,RAF1,RHOT1,RHOV,RND2,ROCK1,RRAS2,SHC1,SOS1,SOS2,SRC,TLN1,TNK2,TSPAN2,TSPAN3,WAS,WASL,WIPF1
PI3K/AKT Signaling	4.3	AKT1,BCL2,CDC37,CDKN1A,CTNNB1,CXCR1,EIF4E,GAB1,GAB2,GRB2,GYS1,HRAS,HSP90AB1,IL10RB,IL12RB1,IL17RC,IL17RE,IL21R,IL22RA2,IL2RA,IL6ST,ILK,ITGA4,ITGB1,JAK1,LIMS1,MAP3K8,MAPK3,MDM2,NFKBIB,NFKBID,NRAS,PDPK1,PIK3R1,PIK3R2,PPP2CB,PPP2R1B,PPP2R2A,PPP2R2B,PPP2R2C,PPP2R3B,PPP2R5A,PPP2R5D,PTPA,RAF1,RELA,RHEB,RPS6KB2,RRAS2,SHC1,SOS1,SOS2,TSC1,YWHAE
Glioma Signaling	4.27	ABL1,AKT1,CALM1 (includes others),CALML5,CAMK2B,CAMK2D,CAMK2G,CDK4,CDKN1A,CDKN2A,E2F2,E2F3,E2F5,GRB2,HRAS,IDH3B,IDH3G,MAPK3,MDM2,NRAS,PIK3C2A,PIK3C2B,PIK3C3,PIK3R1,PIK3R2,PIK3R5,PLCG2,PRKCD,PRKCE,PRKCI,PRKCZ,RAF1,RBL2,RRAS2,SHC1,SIN3A,SOS1,SOS2,SUV39H1
HGF Signaling	4.27	AKT1,ATF2,CDC42,CDKN1A,CDKN2A,CRKL,ELF2,FOS,GAB1,GRB2,HGF,HRAS,ITGA4,ITGB1,MAP3K12,MAP3K4,MAP3K6,MAP3K7,MAP3K8,MAPK3,NRAS,PIK3C2A,PIK3C2B,PIK3C3,PIK3R1,PIK3R2,PIK3R5,PLCG2,PRKCD,PRKCE,PRKCI,PRKCZ,RAC1,RAF1,RRAS2,SOS1,SOS2,STAT3
Natural Killer Cell Signaling	4.27	AKT1,CDC42,CFL1,CFL2,GRB2,HLA-F,HRAS,HSPA1A/HSPA1B,HSPA1L,HSPA4,HSPA9,IL12RB1,IL15,ITGAL,ITGB1,KIR2DL5B,LAIR1,LCK,LCP2,LIMK1,LIMK2,MAP2K3,MAP3K12,MAP3K4,MAP3K6,MAP3K7,MAP3K8,MAPK3,MICA,MICB,MYD88,NCK1,NCR3,NFAT5,NFATC1,NFATC3,NRAS,PAK2,PIK3C2A,PIK3C2B,PIK3C3,PIK3R1,PIK3R2,PIK3R5,PLCG2,PVR,RAC1,RAF1,RASSF5,RELA,ROCK1,RRAS2,SOS1,SOS2,SYK,TRAF6,WAS,WASL,WIPF1
Erythropoietin Signaling	4.25	AKT1,EPOR,FOS,GRB2,HRAS,MAPK3,NFKBIB,NFKBID,NRAS,PDPK1,PIK3C2A,PIK3C2B,PIK3C3,PIK3R1,PIK3R2,PIK3R5,PLCG2,PRKCD,PRKCE,PRKCI,PRKCZ,RAF1,RELA,RRAS2,SHC1,SOS1,SOS2,SRC,STAT5A
Assembly of RNA Polymerase II Complex	4.21	CCNH,CDK7,DR1,ERCC3,GTF2F1,GTF2H2,GTF2H3,MNAT1,POLR2B,POLR2C,POLR2F,POLR2H,POLR2J2/POLR2J3,POLR2K,TAF10,TAF15,TAF1L,TAF2,TAF5L,TAF6,TAF9
Phospholipase C Signaling	4.19	ADCY2,ADCY3,ADCY7,AHNAK,ARHGEF1,ARHGEF12,ARHGEF16,ARHGEF17,ARHGEF2,ARHGEF6,ARHGEF7,ARHGEF9,ATF2,ATF4,BTK,CALM1 (includes others),CALML5,CD79A,CD79B,CDC42,CREB1,CREB3,CREBBP,GNA13,GNAS,GNB1L,GNG3,GRB2,HDAC2,HDAC4,HDAC8,HDAC9,HRAS,ITGA4,ITGB1,ITPR1,ITPR2,ITPR3,LCK,LCP2,LYN,MAPK3,MEF2A,MEF2B,NFAT5,NFATC1,NFATC3,NRAS,PLCB3,PLCD1,PLCG2,PLD3,PPP3CA,PPP3CB,PPP3CC,PRKCD,PRKCE,PRKCI,PRKCZ,RAC1,RAF1,RAPGEF…
Pancreatic Adenocarcinoma Signaling	4.18	ABL1,AKT1,BCL2,BIRC5,CCNE1,CDC42,CDK4,CDKN1A,CDKN2A,E2F2,E2F3,E2F5,GRB2,JAK1,MAPK3,MDM2,NOTCH1,PGF,PIK3C2A,PIK3C2B,PIK3C3,PIK3R1,PIK3R2,PIK3R5,PLD3,RAC1,RAF1,RALBP1,RELA,SIN3A,SMAD2,SMAD4,STAT1,STAT3,SUV39H1,VEGFA,VEGFB
Telomerase Signaling	4.17	ABL1,AKT1,CDKN1A,ELF2,GRB2,HDAC2,HDAC4,HDAC8,HDAC9,HRAS,HSP90AB1,IL2RA,MAPK3,NRAS,PDPK1,PIK3C2A,PIK3C2B,PIK3C3,PIK3R1,PIK3R2,PIK3R5,POT1,PPP2CB,PPP2R1B,PPP2R2A,PPP2R2B,PPP2R2C,PPP2R3B,PPP2R5A,PPP2R5D,PTPA,RAF1,RRAS2,SHC1,SOS1,SOS2
FLT3 Signaling in Hematopoietic Progenitor Cells	4.13	AKT1,ATF2,ATF4,CREB1,CREB3,CREBBP,EIF4E,GAB2,GRB2,HRAS,MAPK3,NRAS,PDPK1,PIK3C2A,PIK3C2B,PIK3C3,PIK3R1,PIK3R2,PIK3R5,RAF1,RPS6KA3,RPS6KA4,RRAS2,SHC1,SOS1,SOS2,STAT1,STAT3,STAT5A
Prolactin Signaling	4.11	CREBBP,FOS,GRB2,HRAS,MAPK3,NMI,NR3C1,NRAS,PDPK1,PIK3C2A,PIK3C2B,PIK3C3,PIK3R1,PIK3R2,PIK3R5,PLCG2,PRKCD,PRKCE,PRKCI,PRKCZ,RAF1,RRAS2,SHC1,SOCS6,SOS1,SOS2,STAT1,STAT3,STAT5A,TCF7
Actin Cytoskeleton Signaling	4.1	ABI2,ACTN4,ACTR3,ARHGAP35,ARHGEF1,ARHGEF12,ARHGEF6,ARHGEF7,ARPC2,ARPC5,CDC42,CFL1,CFL2,CRK,CRKL,CYFIP2,DIAPH3,F2R,FGD3,FGF1,FGF19,FGF20,FGF9,FLNA,GNA12,GNA13,GRB2,HRAS,IQGAP1,ITGA4,ITGB1,LBP,LIMK1,LIMK2,MAPK3,MSN,MYH10,MYH13,NCKAP1,NCKAP1L,NRAS,PAK2,PFN1,PFN3,PIK3C2A,PIK3C2B,PIK3C3,PIK3R1,PIK3R2,PIK3R5,RAC1,RAF1,ROCK1,RRAS2,SHC1,SOS1,SOS2,SSH1,TLN1,TMSB10/TMSB4X,WAS,WASF2,WASL
Cell Cycle Regulation by BTG Family Proteins	4.1	CCNE1,CCNE2,CDK4,CNOT7,E2F2,E2F3,E2F5,NOCT,PPP2CB,PPP2R1B,PPP2R2A,PPP2R2B,PPP2R2C,PPP2R3B,PPP2R5A,PPP2R5D,PTPA
ErbB4 Signaling	4.09	AKT1,APH1A,GRB2,HRAS,MAPK3,NRAS,PDPK1,PIK3C2A,PIK3C2B,PIK3C3,PIK3R1,PIK3R2,PIK3R5,PLCG2,PRKCD,PRKCE,PRKCI,PRKCZ,PSEN1,PSEN2,PSENEN,RAF1,RRAS2,SHC1,SOS1,SOS2
iCOS-iCOSL Signaling in T Helper Cells	4.09	AKT1,CALM1 (includes others),CALML5,CAMK2B,CAMK2D,CAMK2G,CD40,CD80,GAB2,GRB2,HLA-DMA,HLA-DMB,ICOSLG/LOC102723996,IL2RA,ITPR1,ITPR2,ITPR3,LCK,LCP2,NFAT5,NFATC1,NFATC3,NFKBIB,NFKBID,PDPK1,PIK3C2A,PIK3C2B,PIK3C3,PIK3R1,PIK3R2,PIK3R5,PLEKHA3,PPP3CA,PPP3CB,PPP3CC,RAC1,RELA,SHC1
ERK5 Signaling	4.06	AKT1,ATF2,ATF4,CREB1,CREB3,CREBBP,CTF1,ELK4,FOS,GAB1,GNA12,GNA13,HRAS,IL6ST,MAP3K8,MEF2A,MEF2B,NRAS,RPS6KA3,RPS6KA4,RPS6KB2,RPS6KC1,RRAS2,SH2D2A,SRC,WNK1,YWHAE
Adipogenesis pathway	3.87	AGPAT2,AKT1,ARNTL,ATG7,BMP4,BMPR2,BSCL2,CCNH,CDK5,CDK7,CTBP1,CTNNB1,DDIT3,EGR2,ERCC3,FABP4,FGF1,FZD1,GTF2H2,GTF2H3,HAT1,HDAC2,HDAC4,HDAC8,HDAC9,HIF1A,KAT6A,KAT7,KDM1A,MNAT1,NOCT,PAXIP1,PER2,PPIP5K1,RBBP7,RPS6KC1,SIN3A,SIRT2,SOX9,SREBF1,TCF7,TNF
Protein Kinase A Signaling	3.84	ACP1,ADCY2,ADCY3,ADCY7,ADD1,AKAP1,AKAP10,AKAP11,AKAP12,AKAP13,AKAP17A,ANAPC1,ANAPC11,ATF1,ATF2,ATF4,BRAF,CALM1 (includes others),CALML5,CAMK2B,CAMK2D,CAMK2G,CDC25A,CDC25C,CNGA3,CREB1,CREB3,CREBBP,CTNNB1,DUSP1,DUSP10,DUSP11,DUSP12,DUSP16,DUSP22,DUSP26,DUSP4,DUSP5,EBI3,EYA3,FLNA,GDPD1,GLI3,GNA13,GNAI1,GNAI2,GNAS,GNB1L,GNG3,GYS1,H1-1,H3-3A/H3-3B,ITPR1,ITPR2,ITPR3,MAPK3,MTMR3,MYH10,NFAT5,NFATC1,NFATC…
Necroptosis Signaling Pathway	3.83	BIRC3,CAMK2B,CAMK2D,CAMK2G,CAPN1,CAPN10,CAPN3,CASP8,CFLAR,DNM1L,EIF2AK2,FADD,FAS,JAK1,MAP3K7,MDM2,MLKL,NGFR,PAM16,PELI1,PPP3CA,PPP3CB,PPP3CC,PYCARD,RBCK1,RBL2,RIPK1,RIPK3,SLC25A10,SLC25A3,STAT1,TAB1,TICAM1,TIMM10,TIMM13,TIMM17B,TIMM23,TIMM8A,TIMM8B,TNF,TNIP1,TOMM20,TOMM22,TOMM40,TOMM40L,TOMM70,VDAC1,VDAC3
NF-κB Activation by Viruses	3.8	AKT1,CR2,CXCR5,EIF2AK2,HRAS,ITGA4,ITGAL,ITGAV,ITGB1,ITGB2,LCK,MAPK3,NFKBIB,NFKBID,NRAS,PIK3C2A,PIK3C2B,PIK3C3,PIK3R1,PIK3R2,PIK3R5,PRKCD,PRKCE,PRKCI,PRKCZ,RAF1,RELA,RIPK1,RRAS2
ILK Signaling	3.78	ACTN4,AKT1,ARHGEF6,ATF2,ATF4,CDC42,CFL1,CFL2,CREB1,CREB3,CREBBP,CTNNB1,FLNA,FOS,HIF1A,ILK,ITGB1,ITGB2,LIMS1,MAPK3,MYH10,MYH13,NACA,NCK2,PARVB,PDPK1,PGF,PIK3C2A,PIK3C2B,PIK3C3,PIK3R1,PIK3R2,PIK3R5,PPP1R14B,PPP2CB,PPP2R1B,PPP2R2A,PPP2R2B,PPP2R2C,PPP2R3B,PPP2R5A,PPP2R5D,PTPA,RAC1,RELA,RHOT1,RHOV,RND2,RPS6KA4,RSU1,TESK1,TMSB10/TMSB4X,TNF,VEGFA,VEGFB
NF-κB Signaling	3.78	AKT1,AZI2,BMP4,BMPR2,BRAF,BTRC,CARD11,CASP8,CD40,CREBBP,CSNK2A1,CSNK2A2,CSNK2B,EIF2AK2,FADD,HDAC2,HRAS,IL37,INSR,LCK,LTA,MAP3K7,MAP3K8,MYD88,NFKBIB,NFKBID,NGFR,NRAS,PELI1,PIK3C2A,PIK3C2B,PIK3C3,PIK3R1,PIK3R2,PIK3R5,PLCG2,PRKCZ,RAF1,RELA,RELB,RIPK1,RRAS2,TAB1,TLR6,TLR7,TNF,TNFRSF17,TNIP1,TRAF5,TRAF6,UBE2N,UBE2V1
CREB Signaling in Neurons	3.72	ADCY2,ADCY3,ADCY7,AKT1,ATF2,ATF4,CACNA1C,CALM1 (includes others),CALML5,CAMK2B,CAMK2D,CAMK2G,CREB1,CREB3,CREBBP,GNA12,GNA13,GNAI1,GNAI2,GNAO1,GNAS,GNB1L,GNG3,GRB2,GRIA1,GRIK1,GRIK2,GRIN2B,GRM2,HRAS,ITPR1,ITPR2,ITPR3,MAPK3,NRAS,PDIA3,PIK3C2A,PIK3C2B,PIK3C3,PIK3R1,PIK3R2,PIK3R5,PLCB3,PLCD1,PLCG2,POLR2B,POLR2C,POLR2F,POLR2H,POLR2J2/POLR2J3,POLR2K,PRKCD,PRKCE,PRKCI,PRKCZ,RAF1,RRAS2,SHC1,SOS1,SOS2
FGF Signaling	3.7	AKT1,ATF2,ATF4,CREB1,CREB3,CREBBP,CRK,CRKL,FGF1,FGF19,FGF20,FGF9,GAB1,GRB2,HGF,HRAS,ITPR1,MAP2K3,MAPK3,PIK3C2A,PIK3C2B,PIK3C3,PIK3R1,PIK3R2,PIK3R5,RAC1,RAF1,SOS1,SOS2,STAT3
Production of Nitric Oxide and Reactive Oxygen Species in Macrophages	3.66	AKT1,APOE,CAT,CDC42,CLU,CREBBP,FOS,IFNGR1,IFNGR2,IRF8,JAK1,MAP3K12,MAP3K4,MAP3K6,MAP3K7,MAP3K8,MAPK3,NFKBIB,NFKBID,NGFR,PIK3C2A,PIK3C2B,PIK3C3,PIK3R1,PIK3R2,PIK3R5,PLCG2,PON1,PPARA,PPP1CC,PPP1R10,PPP1R14B,PPP1R3D,PPP1R7,PPP2CB,PPP2R1B,PPP2R2A,PPP2R2B,PPP2R2C,PPP2R3B,PPP2R5A,PPP2R5D,PRKCD,PRKCE,PRKCI,PRKCZ,PTPA,RAC1,RELA,RHOT1,RHOV,RND2,SERPINA1,STAT1,TNF
Dopamine-DARPP32 Feedback in cAMP Signaling	3.62	ADCY2,ADCY3,ADCY7,ATF1,ATF2,ATF4,CACNA1C,CALM1 (includes others),CALML5,CDK5,CREB1,CREB3,CREBBP,CSNK1G1,CSNK1G3,DRD3,GNAI1,GNAI2,GNAS,GRIN2B,GRINA,ITPR1,ITPR2,ITPR3,KCNJ14,KCNJ15,PDIA3,PLCB3,PLCD1,PLCG2,PPP1CC,PPP1R10,PPP1R14B,PPP1R3D,PPP1R7,PPP2CB,PPP2R1B,PPP2R2A,PPP2R2B,PPP2R2C,PPP2R3B,PPP2R5A,PPP2R5D,PPP3CA,PPP3CB,PPP3CC,PRKCD,PRKCE,PRKCI,PRKCZ,PTPA
FAK Signaling	3.51	AKT1,ARHGEF6,ARHGEF7,CAPN1,CAPN10,CAPN3,CRK,GIT2,GRB2,HMMR,HRAS,ITGA4,ITGB1,MAPK3,NRAS,PAK2,PDPK1,PIK3C2A,PIK3C2B,PIK3C3,PIK3R1,PIK3R2,PIK3R5,PLCG2,RAC1,RAF1,RRAS2,SOS1,SOS2,SRC,TLN1,WAS
Lymphotoxin β Receptor Signaling	3.51	AKT1,CREBBP,CXCL1,DIABLO,LTA,LTB,MAPK3,NFKBID,PDPK1,PIK3C2A,PIK3C2B,PIK3C3,PIK3R1,PIK3R2,PIK3R5,RELA,RELB,TNFSF14,TRAF1,TRAF5,TRAF6
Renal Cell Carcinoma Signaling	3.5	AKT1,CDC42,CREBBP,CRK,CUL2,EGLN3,FOS,GAB1,GRB2,HGF,HIF1A,HRAS,MAPK3,NRAS,PAK2,PIK3C2A,PIK3C2B,PIK3C3,PIK3R1,PIK3R2,PIK3R5,RAC1,RAF1,RPS27A,RRAS2,SOS1,SOS2,VEGFA
PEDF Signaling	3.5	AKT1,BCL2,BDNF,CASP8,CFLAR,FAS,HRAS,MAPK3,NFKBIB,NFKBID,NRAS,PIK3C2A,PIK3C2B,PIK3C3,PIK3R1,PIK3R2,PIK3R5,PNPLA2,RAC1,RAF1,RELA,ROCK1,RRAS2,SOD2,TCF12,TCF7,WASF2,ZEB1
Apelin Endothelial Signaling Pathway	3.5	ADCY2,ADCY3,ADCY7,AKT1,CALM1 (includes others),CALML5,FOS,GNA13,GNAI1,GNAI2,GNAO1,GNAS,HDAC4,HIF1A,HRAS,ICAM1,MAPK3,MEF2A,MEF2B,NRAS,PIK3C2A,PIK3C2B,PIK3C3,PIK3R1,PIK3R2,PIK3R5,PLCB3,PRKAA1,PRKAB1,PRKAB2,PRKCD,PRKCE,PRKCI,PRKCZ,RAF1,RELA,RPS6KB2,RRAS2
Aryl Hydrocarbon Receptor Signaling	3.46	AHR,ALDH16A1,ALDH18A1,ALDH1A3,ALDH1B1,ALDH1L1,ALDH1L2,ALDH3A2,ALDH4A1,ALDH6A1,ATM,BAX,CCNA2,CCNE1,CCNE2,CDK4,CDKN1A,CDKN2A,CHEK2,CTSD,DHFR,FAS,FOS,GSTO1,GSTP1,GSTZ1,HSP90AB1,MAPK3,MCM7,MDM2,NCOA2,NCOA3,NCOR2,NEDD8,NRIP1,POLA1,RBL2,RELA,RXRB,SLC35A2,SMARCA4,SRC,TNF,TRIP11
Thrombopoietin Signaling	3.44	FOS,GAB2,GRB2,HRAS,MAPK3,NRAS,PIK3C2A,PIK3C2B,PIK3C3,PIK3R1,PIK3R2,PIK3R5,PLCG2,PRKCD,PRKCE,PRKCI,PRKCZ,RAF1,RRAS2,SHC1,SOS1,STAT1,STAT3,STAT5A
NRF2-mediated Oxidative Stress Response	3.42	ABCC1,ABCC4,AKT1,ATF4,BACH1,CAT,CDC34,CREBBP,DNAJB1,DNAJB12,DNAJB14,DNAJB6,DNAJB9,DNAJC15,DNAJC17,DNAJC18,DNAJC19,DNAJC21,DNAJC3,DNAJC5,EPHX1,ERP29,FOS,GCLM,GSTO1,GSTP1,GSTZ1,HERPUD1,HRAS,JUNB,MAFF,MAFG,MAP2K3,MAP3K7,MAPK3,NRAS,PIK3C2A,PIK3C2B,PIK3C3,PIK3R1,PIK3R2,PIK3R5,PRKCD,PRKCE,PRKCI,PRKCZ,RAF1,RRAS2,SCARB1,SLC35A2,SOD1,SOD2,TXNRD1
Pyridoxal 5'-phosphate Salvage Pathway	3.41	BRAF,CDK1,CDK4,CDK5,CDK7,CDK8,DYRK1A,EIF2AK2,FAM20B,GRK6,HIPK1,LIMK1,LIMK2,MAP2K3,MAP3K6,MAP3K8,MAPK3,MAPK6,PAK2,PIM1,PKN1,PNPO,PRKAA1,PRKCD,PRKCE,PRPF4B
Non-Small Cell Lung Cancer Signaling	3.41	ABL1,AKT1,CDK4,CDKN2A,FHIT,GRB2,HRAS,ITPR1,ITPR2,ITPR3,MAPK3,NRAS,PDPK1,PIK3C2A,PIK3C2B,PIK3C3,PIK3R1,PIK3R2,PIK3R5,RAF1,RASSF5,RRAS2,RXRB,SIN3A,SOS1,SOS2,SUV39H1
GDNF Family Ligand-Receptor Interactions	3.41	CDC42,CREB1,FOS,GAB1,GFRA1,GRB2,HRAS,ITPR1,ITPR2,ITPR3,MAPK3,NCK1,NRAS,PIK3C2A,PIK3C2B,PIK3C3,PIK3R1,PIK3R2,PIK3R5,PLCG2,RAC1,RAF1,RASA1,RRAS2,SHC1,SOS1,SOS2
Opioid Signaling Pathway	3.4	ADCY2,ADCY3,ADCY7,AKT1,AP1B1,AP2A1,AP2B1,AP2S1,ARRB1,ATF2,ATF4,BRAF,CACNA1C,CALM1 (includes others),CALML5,CAMK2B,CAMK2D,CAMK2G,CDC42,CLTC,CREB1,CREB3,CREBBP,CTNNB1,FGR,FOS,GNAI1,GNAI2,GNAO1,GNAS,GRIN2B,GRINA,GRK6,HRAS,ITPR1,ITPR2,ITPR3,LCK,LYN,MAP2K3,MAPK15,MAPK3,MAPK6,NRAS,OPRK1,OPRL1,OPRM1,PDYN,PPP3CA,PPP3CB,PPP3CC,PRKCD,PRKCE,PRKCI,PRKCZ,RAC1,RAF1,RGS1,RGS14,RGS19,RPS6KA3,RPS6KA4,RPS6KB2,RRAS…
Systemic Lupus Erythematosus In B Cell Signaling Pathway	3.39	AKT1,BCL2,BTK,CALM1 (includes others),CALML5,CARD11,CD40,CD70,CD79A,CD79B,CTNNB1,FGR,FOS,GAB1,GRB2,HRAS,IFNGR1,IFNGR2,IL15,IL25,IL37,IL6ST,IRF7,JAK1,LCK,LTA,LTB,LYN,MAP3K7,MAPK3,MYD88,NFAT5,NFATC1,NFATC3,NRAS,PDPK1,PIK3C2A,PIK3C2B,PIK3C3,PIK3R1,PIK3R2,PIK3R5,PIM2,PLAAT4,PLCG2,PPP3CA,PPP3CB,PPP3CC,PRKCD,PRKCE,PRKCI,PRKCZ,RAC1,RAF1,RASGRP3,RELA,RRAS2,SHC1,SHC3,SOS1,SOS2,SRC,STAT1,STAT3,SYK,TICAM1,T…
TGF-β Signaling	3.33	ACVR1B,ACVR2B,BCL2,BMP4,BMPR2,CDC42,CREBBP,FOS,GRB2,GSC,HOXC9,HRAS,INHBB,IRF7,MAP2K3,MAP3K7,MAP4K1,MAPK3,NRAS,RAF1,RRAS2,RUNX2,RUNX3,SKI,SMAD2,SMAD4,SOS1,SOS2,TAB1,TRAF6,ZFYVE9
JAK/Stat Signaling	3.31	AKT1,CDKN1A,FOS,GRB2,HRAS,JAK1,MAPK3,NRAS,PIAS1,PIAS2,PIK3C2A,PIK3C2B,PIK3C3,PIK3R1,PIK3R2,PIK3R5,PTPN1,RAF1,RELA,RRAS2,SHC1,SOCS6,SOS1,SOS2,STAT1,STAT3,STAT5A
Nucleotide Excision Repair Pathway	3.28	CCNH,CDK7,ERCC3,ERCC6,GTF2H2,GTF2H3,MNAT1,POLR2B,POLR2C,POLR2F,POLR2H,POLR2J2/POLR2J3,POLR2K,RPA2,XPC
Thrombin Signaling	3.27	ADCY2,ADCY3,ADCY7,AKT1,ARHGEF1,ARHGEF12,ARHGEF16,ARHGEF2,ARHGEF6,ARHGEF9,CAMK2B,CAMK2D,CAMK2G,CDC42,CREB1,F2R,F2RL3,GNA12,GNA13,GNAI1,GNAI2,GNAO1,GNAS,GNB1L,GNG3,GRB2,HRAS,ITPR1,ITPR2,ITPR3,MAPK3,NRAS,PDIA3,PDPK1,PIK3C2A,PIK3C2B,PIK3C3,PIK3R1,PIK3R2,PIK3R5,PLCB3,PLCD1,PLCG2,PRKCD,PRKCE,PRKCI,PRKCZ,RAC1,RAF1,RELA,RHOT1,RHOV,RND2,ROCK1,RRAS2,SHC1,SOS1,SRC
CNTF Signaling	3.26	AKT1,GRB2,HRAS,IL6ST,JAK1,MAPK3,NRAS,PIK3C2A,PIK3C2B,PIK3C3,PIK3R1,PIK3R2,PIK3R5,RAF1,RPS6KA3,RPS6KA4,RPS6KB2,RRAS2,SOS1,STAT1,STAT3
Assembly of RNA Polymerase III Complex	3.24	BDP1,BRF2,GTF3C1,GTF3C2,GTF3C3,GTF3C4,GTF3C5,POLR3D
CTLA4 Signaling in Cytotoxic T Lymphocytes	3.22	AKT1,AP1B1,AP1M1,AP1S2,AP2A1,AP2B1,AP2S1,CD80,CLTC,GRB2,HLA-F,LCK,LCP2,PIK3C2A,PIK3C2B,PIK3C3,PIK3R1,PIK3R2,PIK3R5,PPP2CB,PPP2R1B,PPP2R2A,PPP2R2B,PPP2R2C,PPP2R3B,PPP2R5A,PPP2R5D,PTPA,SYK
RANK Signaling in Osteoclasts	3.22	AKT1,BIRC3,CALM1 (includes others),CALML5,FOS,MAP3K12,MAP3K4,MAP3K6,MAP3K7,MAP3K8,MAPK3,MITF,NFATC1,NFKBIB,NFKBID,PIK3C2A,PIK3C2B,PIK3C3,PIK3R1,PIK3R2,PIK3R5,PPP3CA,PPP3CB,PPP3CC,RAF1,RELA,SRC,TRAF5,TRAF6
Salvage Pathways of Pyrimidine Ribonucleotides	3.21	AICDA,APOBEC3F,BRAF,CDK1,CDK4,CDK5,CDK7,CDK8,DYRK1A,EIF2AK2,FAM20B,GRK6,HIPK1,LIMK1,LIMK2,MAP2K3,MAP3K6,MAP3K8,MAPK3,MAPK6,NME1,NME4,NME5,NME7,PAK2,PIM1,PKN1,PRKAA1,PRKCD,PRKCE,PRPF4B,PYCR3,UCKL1,UPP1,UPRT
Gap Junction Signaling	3.18	ADCY2,ADCY3,ADCY7,AKT1,BGLAP,CSNK1G1,CSNK1G3,CTNNB1,GNAI1,GNAI2,GNAS,GRB2,GRIA1,GRIK1,GRIK2,GUCY2D,HRAS,HTR2A,ITPR1,ITPR2,ITPR3,MAPK3,NRAS,NT5C,PDIA3,PIK3C2A,PIK3C2B,PIK3C3,PIK3R1,PIK3R2,PIK3R5,PLCB3,PLCD1,PLCG2,PPP3CA,PPP3CB,PPP3CC,PRKCD,PRKCE,PRKCI,PRKCZ,RAF1,RRAS2,SLC39A7,SMARCC2,SOS1,SOS2,SRC,TJP1,TJP2,TUBA1A,TUBA1B,TUBA4A,TUBB4A,TUBB4B,TUBB6,TUBG1
Role of Macrophages, Fibroblasts and Endothelial Cells in Rheumatoid Arthritis	3.15	AKT1,ATF2,ATF4,AXIN1,C5,CALM1 (includes others),CALML5,CAMK2B,CAMK2D,CAMK2G,CREB1,CREB3,CREBBP,CTNNB1,DKK3,FOS,FZD1,GNAO1,HRAS,ICAM1,IL15,IL16,IL17RC,IL32,IL37,IL6ST,IRAK2,LTA,LTB,MAP2K3,MAP3K7,MAPK3,MMP1,MYD88,NFAT5,NFATC1,NFATC3,NFKBIB,NFKBID,NGFR,NRAS,PDIA3,PGF,PIK3C2A,PIK3C2B,PIK3C3,PIK3R1,PIK3R2,PIK3R5,PLCB3,PLCD1,PLCG2,PPP3CA,PPP3CB,PPP3CC,PRKCD,PRKCE,PRKCI,PRKCZ,PRSS2,RAC1,RAF1,RELA,RIPK1,…
Role of p14/p19ARF in Tumor Suppression	3.13	CDKN2A,MDM2,NPM2,PIK3C2A,PIK3C2B,PIK3C3,PIK3R1,PIK3R2,PIK3R5,POLR3D,RAC1,SENP3,UBTF
LPS-stimulated MAPK Signaling	3.12	ATF1,ATF2,CDC42,CREB1,FOS,HRAS,LBP,MAP2K3,MAP3K7,MAPK3,NFKBIB,NFKBID,NRAS,PIK3C2A,PIK3C2B,PIK3C3,PIK3R1,PIK3R2,PIK3R5,PRKCD,PRKCE,PRKCI,PRKCZ,RAC1,RAF1,RELA,RRAS2
Small Cell Lung Cancer Signaling	3.12	ABL1,AKT1,BCL2,BID,CCNE1,CCNE2,CDK4,FHIT,MAX,NFKBIB,NFKBID,PIK3C2A,PIK3C2B,PIK3C3,PIK3R1,PIK3R2,PIK3R5,RELA,RXRB,SIN3A,SKP2,SUV39H1,TRAF1,TRAF5,TRAF6
Synaptic Long Term Potentiation	3.1	ATF2,ATF4,CACNA1C,CALM1 (includes others),CALML5,CAMK2B,CAMK2D,CAMK2G,CREB1,CREB3,CREBBP,GRIA1,GRIN2B,GRINA,GRM2,HRAS,ITPR1,ITPR2,ITPR3,MAPK3,NRAS,PDIA3,PLCB3,PLCD1,PLCG2,PPP1CC,PPP1R10,PPP1R14B,PPP1R3D,PPP1R7,PPP3CA,PPP3CB,PPP3CC,PRKCD,PRKCE,PRKCI,PRKCZ,RAF1,RAPGEF3,RRAS2
Insulin Receptor Signaling	3.08	AKT1,CRK,CRKL,EIF2B1,EIF2B5,EIF4E,GAB1,GRB2,GYS1,HRAS,INSR,JAK1,MAPK3,NCK1,NRAS,PDPK1,PIK3C2A,PIK3C2B,PIK3C3,PIK3R1,PIK3R2,PIK3R5,PPP1CC,PPP1R10,PPP1R14B,PPP1R3D,PPP1R7,PRKCI,PRKCZ,PTPN1,RAF1,RPS6KB2,RPTOR,RRAS2,SCNN1G,SHC1,SOS1,SOS2,STX4,TRIP10,TSC1,VAMP2
PAK Signaling	3.07	ARHGEF6,ARHGEF7,CDC42,CFL1,CFL2,DSCAM,GRB2,HRAS,ITGA4,ITGB1,LIMK1,LIMK2,MAPK3,NCK1,NCK2,NRAS,PAK2,PIK3C2A,PIK3C2B,PIK3C3,PIK3R1,PIK3R2,PIK3R5,RAC1,RAF1,RRAS2,SHC1,SOS1,SOS2,TNF,WASL
CD28 Signaling in T Helper Cells	3.03	ACTR3,AKT1,ARPC2,ARPC5,CALM1 (includes others),CALML5,CARD11,CD80,CDC42,FOS,GRB2,HLA-DMA,HLA-DMB,ITPR1,ITPR2,ITPR3,LCK,LCP2,NFAT5,NFATC1,NFATC3,NFKBIB,NFKBID,PDPK1,PIK3C2A,PIK3C2B,PIK3C3,PIK3R1,PIK3R2,PIK3R5,PPP3CA,PPP3CB,PPP3CC,RAC1,RELA,SYK,WAS
Androgen Signaling	2.96	AR,CACNA1C,CALM1 (includes others),CALML5,CCNH,CDK7,CREBBP,DNAJB1,ERCC3,GNA12,GNA13,GNAI1,GNAI2,GNAO1,GNAS,GNB1L,GNG3,GTF2F1,GTF2H2,GTF2H3,HSPA4,KAT7,MAPK3,MNAT1,NCOA2,POLR2B,POLR2C,POLR2F,POLR2H,POLR2J2/POLR2J3,POLR2K,PRKCD,PRKCE,PRKCI,PRKCZ,RELA,SHC1,SRC,SRY,TAF2
Sumoylation Pathway	2.95	AR,ARHGDIA,ARHGDIB,CBX4,CDC42,CREBBP,CTBP1,DNMT3A,FAS,FOS,HDAC2,KDM1A,MDM2,NR3C1,PCNA,PIAS1,PML,RAC1,RCC1,RFC2,RFC3,RHOT1,RHOV,RND2,SENP3,SENP5,SENP7,SMAD4,SP100,SUMO1,SUMO3,UBE2I,ZEB1
DNA Double-Strand Break Repair by Homologous Recombination	2.95	ABL1,ATM,ATRX,BRCA1,LIG1,MRE11,NBN,POLA1
VEGF Signaling	2.93	ACTN4,AKT1,BCL2,EIF1,EIF2B1,EIF2B5,EIF2S1,ELAVL1,GRB2,HIF1A,HRAS,MAPK3,NRAS,PGF,PIK3C2A,PIK3C2B,PIK3C3,PIK3R1,PIK3R2,PIK3R5,PLCG2,RAF1,ROCK1,RRAS2,SH2D2A,SHC1,SOS1,SOS2,SRC,VEGFA,VEGFB,YWHAE
Remodeling of Epithelial Adherens Junctions	2.92	ACTN4,ACTR3,ARF6,ARPC2,ARPC5,CTNNB1,CTNND1,DNM1L,EXOC2,HGF,IQGAP1,NME1,RAB5B,RAB5C,RAB7A,SRC,TUBA1A,TUBA1B,TUBA4A,TUBB4A,TUBB4B,TUBB6,TUBG1
Role of PKR in Interferon Induction and Antiviral Response	2.92	ATF2,ATF3,BAX,BID,CASP8,DNAJC3,EIF2AK2,EIF2S1,FADD,FANCC,FAS,FOS,HSP90AB1,HSPA1A/HSPA1B,HSPA1L,HSPA4,HSPA9,IFNGR1,IFNGR2,JAK1,MAP2K3,MAP3K7,MAPK3,METAP2,MSR1,MYD88,NFKBIB,NFKBID,PYCARD,RELA,STAT1,STAT3,TARBP2,TNF,TRAF6
IL-8 Signaling	2.83	AKT1,BAX,BCL2,BRAF,CDC42,CR2,CXCL1,CXCR1,FOS,GNA12,GNA13,GNAI1,GNAI2,GNAS,GNB1L,GNG3,HRAS,ICAM1,IQGAP1,IRAK2,ITGAV,ITGB2,LASP1,LIMK1,LIMK2,MAPK3,NFKBIB,NRAS,PAK2,PGF,PIK3C2A,PIK3C2B,PIK3C3,PIK3R1,PIK3R2,PIK3R5,PLD3,PRKCD,PRKCE,PRKCI,PRKCZ,RAB11FIP2,RAC1,RAF1,RELA,RHOT1,RHOV,RND2,ROCK1,RRAS2,SRC,TRAF6,VEGFA,VEGFB
CD40 Signaling	2.82	ATF1,CD40,FCER2,FOS,ICAM1,LTA,MAP2K3,MAP3K7,MAPK3,NFKBIB,NFKBID,PIK3C2A,PIK3C2B,PIK3C3,PIK3R1,PIK3R2,PIK3R5,RELA,STAT3,TRAF1,TRAF5,TRAF6
Tight Junction Signaling	2.82	AKT1,ARHGEF2,CDC42,CDK4,CLDN20,CLDN3,CLDN9,CPSF1,CPSF3,CPSF4,CPSF6,CSTF3,CTNNB1,EPB41,FOS,HSF1,MPP5,MYH10,MYH13,NAPB,NAPG,NECTIN1,NECTIN3,NGFR,PPP2CB,PPP2R1B,PPP2R2A,PPP2R2B,PPP2R2C,PPP2R3B,PPP2R5A,PPP2R5D,PRKCI,PRKCZ,PTPA,RAC1,RELA,STX4,TJP1,TJP2,TNF,VAMP2,VAMP3,VAPA,VTI1B,YKT6
cAMP-mediated signaling	2.81	ADCY2,ADCY3,ADCY7,ADORA2A,ADORA3,ADRA2B,AGTR1,AKAP1,AKAP10,AKAP11,AKAP12,AKAP13,AKAP17A,ATF2,ATF4,BRAF,CALM1 (includes others),CALML5,CAMK2B,CAMK2D,CAMK2G,CNGA3,CREB1,CREB3,CREBBP,DRD3,DUSP1,DUSP4,GDPD1,GNAI1,GNAI2,GNAO1,GNAS,GPER1,GRM2,HTR4,HTR6,MAPK3,MC1R,OPRK1,OPRL1,OPRM1,PDE4B,PDE6C,PDE6D,PDE6G,PDE8A,PKIA,PKIG,PPP3CA,PPP3CB,PPP3CC,RAF1,RAPGEF3,RGS14,RGS2,S1PR1,SRC,STAT3,TBXA2R
G-Protein Coupled Receptor Signaling	2.76	ADCY2,ADCY3,ADCY7,ADORA2A,ADORA3,ADRA1D,ADRA2B,AGTR1,AKT1,ATF2,ATF4,BRAF,CAMK2B,CAMK2D,CAMK2G,CREB1,CREB3,CREBBP,DRD3,DUSP1,DUSP4,GDPD1,GNAI1,GNAI2,GNAO1,GNAS,GPER1,GRB2,GRM2,HRAS,HTR2A,HTR4,HTR6,MAP3K8,MAPK3,MC1R,NFKBIB,NFKBID,NRAS,OPRK1,OPRL1,OPRM1,PDE4B,PDE6C,PDE6D,PDE6G,PDE8A,PDPK1,PIK3C2A,PIK3C2B,PIK3C3,PIK3R1,PIK3R2,PIK3R5,PLCB3,PRKCE,RAF1,RAPGEF3,RASA1,RELA,RGS14,RGS2,RRAS2,S1PR1,SHC1,SOS1…
Endocannabinoid Developing Neuron Pathway	2.75	ADCY2,ADCY3,ADCY7,AKT1,ATF2,ATF4,BRAF,BRCA1,CREB1,CREB3,CREBBP,CTNNB1,GNAI1,GNAI2,GNAO1,GNB1L,HRAS,MAP2K3,MAPK15,MAPK3,MAPK6,NRAS,PIK3C2A,PIK3C2B,PIK3C3,PIK3R1,PIK3R2,PIK3R5,RAC1,RAF1,RPTOR,RRAS2,SRC,STAT3
UVA-Induced MAPK Signaling	2.74	ATM,FOS,HRAS,MAPK3,NRAS,PARP1,PARP10,PARP11,PARP4,PARP6,PDIA3,PIK3C2A,PIK3C2B,PIK3C3,PIK3R1,PIK3R2,PIK3R5,PLCB3,PLCD1,PLCG2,RPS6KA3,RPS6KA4,RPS6KB2,RPS6KC1,RRAS2,SMPD1,STAT1,TIPARP,TNKS,TNKS2
Germ Cell-Sertoli Cell Junction Signaling	2.73	ACTN4,AKT1,AXIN1,CDC42,CFL1,CFL2,CTNNB1,CTNND1,HRAS,ILK,IQGAP1,ITGB1,LIMK1,LIMK2,MAP2K3,MAP3K12,MAP3K4,MAP3K6,MAP3K7,MAP3K8,MAPK3,NECTIN3,NRAS,PAK2,PDPK1,PIK3C2A,PIK3C2B,PIK3C3,PIK3R1,PIK3R2,PIK3R5,RAC1,RHOT1,RHOV,RND2,RRAS2,SRC,TJP1,TNF,TUBA1A,TUBA1B,TUBA4A,TUBB4A,TUBB4B,TUBB6,TUBG1,WASL
Paxillin Signaling	2.71	ACTN4,ARF1,ARF6,ARFIP2,ARHGEF6,ARHGEF7,CDC42,CRK,GIT2,GRB2,HRAS,ITGA4,ITGAL,ITGAV,ITGB1,ITGB2,NCK1,NCK2,NRAS,PAK2,PIK3C2A,PIK3C2B,PIK3C3,PIK3R1,PIK3R2,PIK3R5,RAC1,RRAS2,SOS1,SOS2,SRC,TLN1
Cleavage and Polyadenylation of Pre-mRNA	2.7	CPSF1,CPSF3,CPSF4,CPSF6,CSTF3,PAPOLA,WDR33
Oncostatin M Signaling	2.67	GRB2,HRAS,IL6ST,JAK1,MAPK3,MMP1,MT2A,NRAS,PLAU,RAF1,RRAS2,SHC1,SOS1,STAT1,STAT3,STAT5A
Virus Entry via Endocytic Pathways	2.66	ABL1,AP1B1,AP1M1,AP1S2,AP2A1,AP2B1,AP2S1,AP3M1,CD55,CDC42,CLTC,FLNA,HLA-F,HRAS,ITGA4,ITGAL,ITGB1,ITGB2,NRAS,PIK3C2A,PIK3C2B,PIK3C3,PIK3R1,PIK3R2,PIK3R5,PLCG2,PRKCD,PRKCE,PRKCI,PRKCZ,RAC1,RRAS2,SRC
Neuropathic Pain Signaling In Dorsal Horn Neurons	2.62	BDNF,CAMK2B,CAMK2D,CAMK2G,CREB1,FOS,GRIA1,GRIN2B,GRINA,GRM2,ITPR1,ITPR2,ITPR3,KCNN3,KCNQ2,MAPK3,PDIA3,PIK3C2A,PIK3C2B,PIK3C3,PIK3R1,PIK3R2,PIK3R5,PLCB3,PLCD1,PLCG2,PRKCD,PRKCE,PRKCI,PRKCZ,SRC
Interferon Signaling	2.61	BAX,BCL2,IFI35,IFIT1,IFITM2,IFNGR1,IFNGR2,JAK1,MX1,PIAS1,PSMB8,PTPN2,RELA,STAT1
Renin-Angiotensin Signaling	2.6	ADCY2,ADCY3,ADCY7,AGTR1,ATF2,FOS,GRB2,HRAS,ITPR1,ITPR2,ITPR3,MAPK3,NRAS,PAK2,PIK3C2A,PIK3C2B,PIK3C3,PIK3R1,PIK3R2,PIK3R5,PLCG2,PRKCD,PRKCE,PRKCI,PRKCZ,RAC1,RAF1,RELA,RRAS2,SHC1,SHC3,SOS1,SOS2,STAT1,STAT3,TNF
T Cell Receptor Signaling	2.57	BTK,CALM1 (includes others),CALML5,CARD11,FOS,GRB2,HRAS,LCK,LCP2,MAPK3,NFAT5,NFATC1,NFATC3,NRAS,PIK3C2A,PIK3C2B,PIK3C3,PIK3R1,PIK3R2,PIK3R5,PPP3CA,PPP3CB,PPP3CC,RAC1,RAF1,RASA1,RELA,RRAS2,SHB,SOS1,SOS2,TEC
Macropinocytosis Signaling	2.56	ABI1,ACTN4,ARF6,CDC42,HGF,HRAS,ITGB1,ITGB2,NRAS,PIK3C2A,PIK3C2B,PIK3C3,PIK3R1,PIK3R2,PIK3R5,PLCG2,PRKCD,PRKCE,PRKCI,PRKCZ,RAC1,RRAS2,SRC,USP6NL
Role of Tissue Factor in Cancer	2.55	AKT1,ARRB1,CDC42,CFL1,CFL2,CXCL1,EIF4E,FGR,GNA12,GNA13,HRAS,ITGAV,ITGB1,LCK,LIMK1,LIMK2,LYN,MAPK3,MMP1,NRAS,PDXP,PIK3C2A,PIK3C2B,PIK3C3,PIK3R1,PIK3R2,PIK3R5,RAC1,RPS6KA3,RPS6KA4,RRAS2,SRC,STAT5A,VEGFA
Actin Nucleation by ARP-WASP Complex	2.55	ACTR3,ARPC2,ARPC5,CDC42,GNA12,GRB2,HRAS,ITGA4,ITGB1,NCK1,NCK2,NRAS,RAC1,RHOT1,RHOV,RND2,ROCK1,RRAS2,SOS1,SOS2,WAS,WASL,WIPF1
iNOS Signaling	2.54	CALM1 (includes others),CALML5,CREBBP,FOS,HMGA1,IFNGR1,IFNGR2,IRAK2,JAK1,LBP,MYD88,NFKBIB,NFKBID,RELA,STAT1,TAB1,TRAF6
Melanoma Signaling	2.53	AKT1,BRAF,CDK4,CDKN1A,CDKN2A,HRAS,MAPK3,MDM2,MITF,NRAS,PIK3C2A,PIK3C2B,PIK3C3,PIK3R1,PIK3R2,PIK3R5,RAF1,RRAS2
Rac Signaling	2.53	ABI2,ACTR3,ARFIP2,ARPC2,ARPC5,CDC42,CFL1,CFL2,CYFIP2,ELK4,HRAS,IQGAP1,ITGA4,ITGB1,LIMK1,LIMK2,MAPK3,NCKAP1,NRAS,PAK2,PIK3C2A,PIK3C2B,PIK3C3,PIK3R1,PIK3R2,PIK3R5,PIKFYVE,PRKCI,PRKCZ,RAC1,RAF1,RELA,RRAS2
Axonal Guidance Signaling	2.53	ABL1,ABLIM1,ACTR3,ADAM12,ADAM8,ADAM9,ADAMTS13,ADAMTS17,ADAMTS3,AKT1,ARHGEF12,ARHGEF6,ARHGEF7,ARPC2,ARPC5,BDNF,BMP4,BMP6,BRCC3,CDC42,CDK5,CFL1,CFL2,COPS5,CRK,CRKL,ECE2,EFNA1,EFNA4,EIF4E,EPHA5,EPHA6,EPHB2,FZD1,GDF7,GLI3,GNA12,GNA13,GNAI1,GNAI2,GNAO1,GNAS,GNB1L,GNG3,GRB2,HRAS,ITGA4,ITGB1,KALRN,LIMK1,LIMK2,LNPEP,MAPK3,MKNK1,MMP1,MMP14,MMP16,NCK1,NCK2,NFAT5,NFATC1,NFATC3,NGFR,NRAS,PAK2,PDIA3,PFN1,PFN3…
RAR Activation	2.52	ADCY2,ADCY3,ADCY7,AKT1,ALDH1A3,CCNH,CDK7,CRABP2,CREBBP,CSNK2A1,CSNK2A2,CSNK2B,DUSP1,ERCC3,FOS,GTF2H2,GTF2H3,MMP1,MNAT1,NCOR1,NCOR2,NRIP1,PARP1,PDPK1,PIK3R1,PIK3R2,PML,PRKCD,PRKCE,PRKCI,PRKCZ,PRMT2,PSMC5,RAC1,RBP5,RDH14,RDH5,RELA,RELB,RXRB,SMAD2,SMAD4,SMARCA4,SMARCC2,SMARCD2,SMARCD3,SRA1,SRC,STAT5A,TNIP1,TRIM24,VEGFA
DNA damage-induced 14-3-3σ Signaling	2.51	AKT1,ATM,BRCA1,CCNB1,CCNE1,CCNE2,CDK1,RAD17,RAD9A
Estrogen-mediated S-phase Entry	2.48	CCNA2,CCNE1,CCNE2,CDC25A,CDK1,CDK4,CDKN1A,E2F2,E2F3,E2F5,SKP2
ErbB Signaling	2.48	AKT1,CDC42,FOS,GRB2,HRAS,MAP2K3,MAPK3,NCK1,NCK2,NRAS,PAK2,PDPK1,PIK3C2A,PIK3C2B,PIK3C3,PIK3R1,PIK3R2,PIK3R5,PLCG2,PRKCD,PRKCE,PRKCI,PRKCZ,RAF1,RRAS2,SHC1,SOS1,SOS2
GNRH Signaling	2.47	ADCY2,ADCY3,ADCY7,ATF2,ATF4,CACNA1C,CALM1 (includes others),CALML5,CAMK2B,CAMK2D,CAMK2G,CDC42,CREB1,CREB3,CREBBP,FOS,FSHB,GNAI1,GNAI2,GNAS,GNRH1,GRB2,HRAS,ITPR1,ITPR2,ITPR3,MAP2K3,MAP3K12,MAP3K4,MAP3K6,MAP3K7,MAP3K8,MAPK3,NRAS,PAK2,PLCB3,PRKCD,PRKCE,PRKCI,PRKCZ,RAC1,RAF1,RELA,RRAS2,SOS1,SOS2,SRC
Granzyme B Signaling	2.46	BID,CASP8,DFFA,ENDOG,LMNB1,LMNB2,PARP1,PRKDC
Glioblastoma Multiforme Signaling	2.46	AKT1,AXIN1,CCNE1,CDC42,CDK4,CDKN1A,CDKN2A,CTNNB1,E2F2,E2F3,E2F5,FZD1,GRB2,HRAS,ITPR1,ITPR2,ITPR3,MAPK3,MDM2,NF1,NF2,NRAS,PDIA3,PIK3C2A,PIK3C2B,PIK3C3,PIK3R1,PIK3R2,PIK3R5,PLCB3,PLCD1,PLCG2,PRKCD,RAC1,RAF1,RHOT1,RHOV,RND2,RRAS2,SHC1,SOS1,SOS2,SRC,TSC1,WNT9B
IL-6 Signaling	2.45	AKT1,CSNK2A1,CSNK2A2,CSNK2B,CYP19A1,FOS,GRB2,HRAS,IL37,IL6ST,LBP,MAP2K3,MAP3K7,MAPK3,NFKBIB,NFKBID,NGFR,NRAS,PIK3C2A,PIK3C2B,PIK3C3,PIK3R1,PIK3R2,PIK3R5,RAF1,RELA,RRAS2,SHC1,SOS1,SOS2,STAT3,TAB1,TNF,TRAF6,VEGFA
HIPPO signaling	2.44	AJUBA,BTRC,FAT4,NF2,PPP1CC,PPP1R10,PPP1R14B,PPP1R3D,PPP1R7,PPP2CB,PPP2R1B,PPP2R2A,PPP2R2B,PPP2R2C,PPP2R3B,PPP2R5A,PPP2R5D,PTPA,SAV1,SCRIB,SKP2,SMAD2,SMAD4,TEAD4,TJP2,YWHAE
Gαq Signaling	2.43	ADRA1D,AGTR1,AKT1,BTK,CALM1 (includes others),CALML5,CDC42,GNAS,GNB1L,GNG3,GYS1,HTR2A,ITPR1,ITPR2,ITPR3,MAPK3,NFATC1,NFATC3,NFKBIB,NFKBID,PIK3C2A,PIK3C2B,PIK3C3,PIK3R1,PIK3R2,PIK3R5,PLCB3,PLCG2,PLD3,PPP3CA,PPP3CB,PPP3CC,PRKCD,PRKCE,PRKCI,PRKCZ,RAC1,RAF1,RELA,RGS2,RHOT1,RHOV,RND2,ROCK1
Ephrin A Signaling	2.43	CDC42,CFL1,CFL2,EFNA1,EFNA4,EPHA5,EPHA6,LIMK1,NGFR,PIK3C2A,PIK3C2B,PIK3C3,PIK3R1,PIK3R2,PIK3R5,RAC1,ROCK1
Polyamine Regulation in Colon Cancer	2.4	AZIN1,CTNNB1,MAX,MXD1,OAZ1,PSME1,PSME3,PSME4,SAT1,SAT2
Melatonin Signaling	2.4	BRAF,CALM1 (includes others),CALML5,CAMK2B,CAMK2D,CAMK2G,GNAI1,GNAI2,GNAO1,GNRH1,MAP2K3,MAPK3,PDIA3,PLCB3,PLCD1,PLCG2,PRKCD,PRKCE,PRKCI,PRKCZ,RAF1,RORA,RORB,RORC
Ephrin B Signaling	2.38	ABI1,ACP1,AXIN1,CDC42,CFL1,CFL2,CTNNB1,EPHB2,GNA12,GNA13,GNAI1,GNAI2,GNAO1,GNAS,GNB1L,GNG3,HRAS,KALRN,LIMK1,MAPK3,NCK2,RAC1,ROCK1
Tec Kinase Signaling	2.38	BTK,CDC42,FADD,FAS,FGR,FOS,GNA12,GNA13,GNAI1,GNAI2,GNAO1,GNAS,GNB1L,GNG3,GTF2I,ITGA4,ITGB1,JAK1,LCK,LYN,PAK2,PIK3C2A,PIK3C2B,PIK3C3,PIK3R1,PIK3R2,PIK3R5,PLCG2,PRKCD,PRKCE,PRKCI,PRKCZ,RAC1,RELA,RHOT1,RHOV,RND2,SRC,STAT1,STAT3,STAT5A,TEC,TNF,WAS
Endometrial Cancer Signaling	2.34	AKT1,AXIN1,CTNNB1,GRB2,HRAS,ILK,MAPK3,MLH1,NRAS,PDPK1,PIK3C2A,PIK3C2B,PIK3C3,PIK3R1,PIK3R2,PIK3R5,RAF1,RRAS2,SOS1,SOS2
Adrenomedullin signaling pathway	2.33	ADCY2,ADCY3,ADCY7,ADM,AKT1,BAX,BCL2,BRAF,C3,CALM1 (includes others),CALML5,FOS,GNAS,GRB2,GUCY2D,HIF1A,HRAS,IL37,ITPR1,ITPR2,ITPR3,KCNN3,KCNQ2,LTA,MAP2K3,MAPK15,MAPK3,MAPK6,MAX,NRAS,NT5C,PDIA3,PIK3C2A,PIK3C2B,PIK3C3,PIK3R1,PIK3R2,PIK3R5,PLCB3,PLCD1,PLCG2,RAF1,RELA,RRAS2,RXRB,SHC1,SHC3,SLC39A7,SMARCC2,SOS1,SOS2,TNF
Role of Oct4 in Mammalian Embryonic Stem Cell Pluripotency	2.33	BMI1,BRCA1,CCNF,CDX2,FBXO15,HOXB1,KDM5B,MEF2A,NR6A1,PARP1,PCGF6,PHB,PHC3,PPP1R8,RXRB,WWP2
Acute Myeloid Leukemia Signaling	2.31	AKT1,BRAF,GRB2,HRAS,IDH3B,IDH3G,MAP2K3,MAPK3,NRAS,PIK3C2A,PIK3C2B,PIK3C3,PIK3R1,PIK3R2,PIK3R5,PIM1,PIM2,PML,RAF1,RELA,RPS6KB2,RRAS2,SOS1,SOS2,STAT3,STAT5A,TCF7
IL-15 Signaling	2.3	AKT1,GNB1L,HRAS,IL15,JAK1,LCK,MAPK3,NRAS,PIK3C2A,PIK3C2B,PIK3C3,PIK3R1,PIK3R2,PIK3R5,RAF1,RELA,RPS6KB2,RPTOR,RRAS2,SHC1,STAT3,STAT5A,SYK
Growth Hormone Signaling	2.3	CSHL1,FOS,MAPK3,PDPK1,PIK3C2A,PIK3C2B,PIK3C3,PIK3R1,PIK3R2,PIK3R5,PLCG2,PRKCD,PRKCE,PRKCI,PRKCZ,RPS6KA3,RPS6KA4,RPS6KB2,RPS6KC1,SOCS6,STAT1,STAT3,STAT5A
Neuregulin Signaling	2.29	AKT1,CDK5,CRK,CRKL,ERBIN,GRB2,HRAS,HSP90AB1,ITGA4,ITGB1,MAPK3,NRAS,PDPK1,PIK3R1,PIK3R2,PLCG2,PRKCD,PRKCE,PRKCI,PRKCZ,PSEN1,RAF1,RPS6KB2,RRAS2,SHC1,SOS1,SOS2,SRC,STAT5A
HER-2 Signaling in Breast Cancer	2.27	AKT1,CCNE1,CCNE2,CDC42,CDKN1A,GRB2,HRAS,ITGB1,ITGB2,MDM2,NRAS,PIK3C2A,PIK3C2B,PIK3C3,PIK3R1,PIK3R2,PIK3R5,PRKCD,PRKCE,PRKCI,PRKCZ,RRAS2,SOS1,SOS2,TSC1
Cardiac Hypertrophy Signaling (Enhanced)	2.27	ACVR1B,ACVR2B,ADCY2,ADCY3,ADCY7,ADRA1D,ADRA2B,AGTR1,AKAP13,AKT1,ATF2,BMPR2,CACNA1C,CALM1 (includes others),CALML5,CAMK2B,CAMK2D,CAMK2G,CD70,CTF1,CTNNB1,CXCR1,DIAPH3,DVL3,EIF2B1,EIF2B5,EIF4E,FGF1,FGF19,FGF20,FGF9,FZD1,GDPD1,GNA12,GNA13,GNAI1,GNAI2,GNAS,HDAC2,HDAC4,HDAC8,HDAC9,HRAS,IL10RB,IL12RB1,IL15,IL17RC,IL17RE,IL21R,IL22RA2,IL25,IL2RA,IL37,IL6ST,ITGA4,ITGB1,ITPR1,ITPR2,ITPR3,LTA,LTB,MAP2K3,MAP…
Amyotrophic Lateral Sclerosis Signaling	2.26	BAX,BCL2,BID,BIRC3,CACNA1C,CAPN1,CAPN10,CAPN3,CAT,CCS,GRIA1,GRIK1,GRIK2,GRIN2B,GRINA,PGF,PIK3C2A,PIK3C2B,PIK3C3,PIK3R1,PIK3R2,PIK3R5,PPP3CA,RAB5B,RAB5C,RAC1,RNF19A,SOD1,VEGFA,VEGFB
IGF-1 Signaling	2.26	AKT1,CSNK2A1,CSNK2A2,CSNK2B,FOS,GRB2,HRAS,JAK1,MAPK3,NEDD4,NRAS,PDPK1,PIK3C2A,PIK3C2B,PIK3C3,PIK3R1,PIK3R2,PIK3R5,PRKCI,PRKCZ,RAF1,RASA1,RPS6KB2,RRAS2,SHC1,SOCS6,SOS1,SOS2,STAT3,YWHAE
Role of NFAT in Cardiac Hypertrophy	2.25	ADCY2,ADCY3,ADCY7,AKT1,CACNA1C,CALM1 (includes others),CALML5,CAMK2B,CAMK2D,CAMK2G,CTF1,GNAI1,GNAI2,GNAS,GNB1L,GNG3,GRB2,HDAC2,HDAC4,HDAC8,HDAC9,HRAS,IL6ST,ITPR1,ITPR2,ITPR3,MAP2K3,MAP3K7,MAPK3,MEF2A,MEF2B,NRAS,PDIA3,PIK3C2A,PIK3C2B,PIK3C3,PIK3R1,PIK3R2,PIK3R5,PLCB3,PLCD1,PLCG2,PPP3CA,PPP3CB,PPP3CC,PRKCD,PRKCE,PRKCI,PRKCZ,RAF1,RRAS2,SHC1,SOS1,SOS2,SRC
Tumoricidal Function of Hepatic Natural Killer Cells	2.24	AIFM1,BAX,BID,CASP8,DFFA,ENDOG,FADD,FAS,ICAM1,ITGAL
T Cell Exhaustion Signaling Pathway	2.24	ACVR1B,ACVR2B,AKT1,BMPR2,CD274,CD80,EOMES,FOS,FOXP1,HLA-DMA,HLA-DMB,HLA-F,HRAS,IL10RB,IL12RB1,JAK1,MAPK3,NFAT5,NFATC1,NFATC3,NRAS,PDCD1LG2,PIK3C2A,PIK3C2B,PIK3C3,PIK3R1,PIK3R2,PIK3R5,PLCG2,PPP2CB,PPP2R1B,PPP2R2A,PPP2R2B,PPP2R2C,PPP2R3B,PPP2R5A,PPP2R5D,PRDM1,PTPA,RRAS2,SMAD2,STAT1,STAT3,TBX21,TCF7,VEGFA
BEX2 Signaling Pathway	2.17	AKT1,BBC3,BCL2,CDKN1A,CTNNB1,HIF1A,KLK3,NGFR,PGF,PPP2CB,PPP2R1B,PPP2R2A,PPP2R2B,PPP2R2C,PPP2R3B,PPP2R5A,PPP2R5D,PTPA,RELA,STAT3,TCF7,TSC1,VEGFA,VEGFB
Mouse Embryonic Stem Cell Pluripotency	2.16	AKT1,AXIN1,BMP4,BMPR2,CREBBP,CTNNB1,DVL3,FZD1,GRB2,HRAS,IL6ST,JAK1,MAP3K7,MAPK3,NRAS,PIK3C2A,PIK3C2B,PIK3C3,PIK3R1,PIK3R2,PIK3R5,RAF1,RRAS2,SMAD4,SOS1,SOS2,STAT3,TAB1,TCF7
CDK5 Signaling	2.16	ABL1,ADCY2,ADCY3,ADCY7,BDNF,CAPN1,CDK5,GNAS,HRAS,ITGB1,MAPK15,MAPK3,MAPK6,NGFR,NRAS,PPP1CC,PPP1R10,PPP1R14B,PPP1R3D,PPP1R7,PPP2CB,PPP2R1B,PPP2R2A,PPP2R2B,PPP2R2C,PPP2R3B,PPP2R5A,PPP2R5D,PTPA,RAF1,RRAS2
Angiopoietin Signaling	2.15	AKT1,BIRC5,CRK,GRB14,GRB2,HRAS,NCK1,NFKBIB,NFKBID,NRAS,PAK2,PIK3C2A,PIK3C2B,PIK3C3,PIK3R1,PIK3R2,PIK3R5,RASA1,RELA,RRAS2,SOS1,STAT5A,TNIP1
Apoptosis Signaling	2.14	AIFM1,BAX,BCL2,BCL2A1,BID,BIRC3,CAPN1,CAPN10,CAPN3,CASP8,CDK1,DFFA,DIABLO,ENDOG,FAS,HRAS,MAPK3,NFKBIB,NFKBID,NRAS,PARP1,PLCG2,PRKCE,RAF1,RELA,ROCK1,RRAS2,TNF
Role of JAK1 and JAK3 in γc Cytokine Signaling	2.11	GRB2,HRAS,IL15,IL21R,IL2RA,JAK1,MAPK3,NRAS,PIK3C2A,PIK3C2B,PIK3C3,PIK3R1,PIK3R2,PIK3R5,RRAS2,SHC1,STAT1,STAT3,STAT5A,SYK,TSLP
SPINK1 General Cancer Pathway	2.11	AKT1,HRAS,JAK1,MAPK3,MT1A,MT1B,MT1E,MT1M,MT1X,MT2A,NRAS,PIK3C2A,PIK3C2B,PIK3C3,PIK3R1,PIK3R2,PIK3R5,PRSS2,RAF1,RRAS2,STAT3
PPAR Signaling	2.1	CREBBP,FOS,GRB2,HRAS,HSP90AB1,IL37,INSR,MAP3K7,MAPK3,NCOR1,NCOR2,NFKBIB,NFKBID,NGFR,NR1H3,NRAS,NRIP1,PPARA,RAF1,RELA,RRAS2,SHC1,SOS1,SOS2,SRA1,STAT5A,TAB1,TNF,TRAF6
Th1 Pathway	2.1	APH1A,CD274,CD40,CD80,CXCR3,GRB2,HLA-DMA,HLA-DMB,ICAM1,ICOSLG/LOC102723996,IFNGR1,IFNGR2,IL10RB,IL12RB1,ITGB2,JAK1,LTA,NFATC1,NFATC3,NOTCH1,PIK3C2A,PIK3C2B,PIK3C3,PIK3R1,PIK3R2,PIK3R5,PSEN1,PSEN2,PSENEN,RUNX3,STAT1,STAT3,TBX21
Wnt/Ca+ pathway	2.09	ATF2,ATF4,AXIN1,CREB1,CREB3,CREBBP,DVL3,FZD1,NFAT5,NFATC1,NFATC3,PDE6C,PDE6D,PDE6G,PDIA3,PLCB3,PLCD1,PLCG2,PPP3CA,RELA
Cardiac Hypertrophy Signaling	2.09	ADCY2,ADCY3,ADCY7,ADRA1D,ADRA2B,ADSS2,AKT1,ATF2,CACNA1C,CALM1 (includes others),CALML5,CDC42,CREB1,CREBBP,EIF2B1,EIF2B5,EIF4E,GNA12,GNA13,GNAI1,GNAI2,GNAO1,GNAS,GNB1L,GNG3,GRB2,HRAS,MAP2K3,MAP3K12,MAP3K4,MAP3K6,MAP3K7,MAP3K8,MAPK3,MAPKAPK3,MEF2A,MEF2B,NRAS,PDIA3,PIK3C2A,PIK3C2B,PIK3C3,PIK3R1,PIK3R2,PIK3R5,PLCB3,PLCD1,PLCG2,PPP3CA,PPP3CB,PPP3CC,RAC1,RAF1,RHOT1,RHOV,RND2,ROCK1,RRAS2,SOS1,TAB1
Regulation of IL-2 Expression in Activated and Anergic T Lymphocytes	2.08	CALM1 (includes others),CALML5,CARD11,CD80,FOS,GRB2,HRAS,MAPK3,NFAT5,NFATC1,NFATC3,NFKBIB,NFKBID,NRAS,PLCG2,PPP3CA,PPP3CB,PPP3CC,RAC1,RAF1,RELA,RRAS2,SMAD2,SMAD4,SOS1,SOS2
Estrogen-Dependent Breast Cancer Signaling	2.08	AKT1,ATF2,ATF4,CREB1,CREB3,CREBBP,CYP19A1,FOS,HRAS,HSD17B14,HSD17B4,MAPK3,NRAS,PIK3C2A,PIK3C2B,PIK3C3,PIK3R1,PIK3R2,PIK3R5,RELA,RRAS2,SRC,STAT5A
Regulation of the Epithelial-Mesenchymal Transition Pathway	2.08	AKT1,APH1A,AXIN1,BCL9,BRAF,CLDN3,CTNNB1,DVL3,FGF1,FGF19,FGF20,FGF9,FZD1,GAB1,GRB2,GSC,HGF,HIF1A,HRAS,JAG1,JAK1,MAP2K3,MAPK3,NOTCH1,NRAS,PIK3C2A,PIK3C2B,PIK3C3,PIK3R1,PIK3R2,PIK3R5,PSEN1,PSEN2,PSENEN,PYGO2,RAF1,RBPJ,RELA,RRAS2,SMAD2,SMAD4,SOS1,SOS2,STAT3,TCF7,TWIST1,WNT9B,ZEB1
Fcγ Receptor-mediated Phagocytosis in Macrophages and Monocytes	2.07	ACTR3,AKT1,ARF6,ARPC2,ARPC5,CDC42,CRK,FGR,GAB2,LCP2,LYN,MAPK3,NCK1,NCK2,PIK3R1,PIK3R2,PLD3,PRKCD,PRKCE,PRKCI,PRKCZ,RAC1,RPS6KB2,SRC,SYK,TLN1,VAMP3,WAS
Induction of Apoptosis by HIV1	2.07	BAX,BBC3,BCL2,BID,BIRC3,CASP8,DFFA,DIABLO,FADD,FAS,NFKBIB,NFKBID,NGFR,RELA,RIPK1,SLC25A10,SLC25A3,TNF,TRAF1
p38 MAPK Signaling	2.07	ATF1,ATF2,ATF4,CREB1,CREB3,CREBBP,DDIT3,DUSP1,DUSP10,FADD,FAS,H3-3A/H3-3B,IL37,IRAK2,MAP2K3,MAP3K7,MAP4K1,MAPKAPK3,MAX,MEF2A,MEF2B,MKNK1,MKNK2,RPS6KA3,RPS6KA4,RPS6KB2,RPS6KC1,STAT1,TAB1,TIFA,TNF,TRAF6
IL-9 Signaling	2.04	JAK1,PIK3C2A,PIK3C2B,PIK3C3,PIK3R1,PIK3R2,PIK3R5,RELA,STAT1,STAT3,STAT5A,TNF
Mechanisms of Viral Exit from Host Cells	2.02	CHMP2A,CHMP4A,CHMP4B,CHMP6,LMNB1,LMNB2,NEDD4,PRKCD,PRKCE,PRKCI,PRKCZ,SH3GLB2,SNF8,VPS4A
CXCR4 Signaling	2	ADCY2,ADCY3,ADCY7,AKT1,CDC42,CRK,ELMO1,ELMO2,FOS,GNA12,GNA13,GNAI1,GNAI2,GNAO1,GNAS,GNB1L,GNG3,HRAS,ITPR1,ITPR2,ITPR3,LYN,MAPK3,NRAS,PAK2,PIK3C2A,PIK3C2B,PIK3C3,PIK3R1,PIK3R2,PIK3R5,PLCB3,PRKCD,PRKCE,PRKCI,PRKCZ,RAC1,RAF1,RHOT1,RHOV,RND2,ROCK1,RRAS2,SRC
Cholecystokinin/Gastrin-mediated Signaling	1.99	ATF2,CDC42,FOS,GNA12,GNA13,GRB2,HRAS,IL37,ITPR1,ITPR2,ITPR3,MAP2K3,MAPK3,MEF2A,MEF2B,NRAS,PLCB3,PRKCD,PRKCE,PRKCI,PRKCZ,RAC1,RAF1,RHOT1,RHOV,RND2,ROCK1,RRAS2,SHC1,SOS1,SOS2,SRC,TNF
HIF1α Signaling	1.98	AKT1,COPS5,CREBBP,CUL2,EGLN1,EGLN2,EGLN3,HIF1A,HRAS,LDHA,MAPK15,MAPK3,MAPK6,MDM2,MMP1,MMP14,MMP16,NAA10,NRAS,PGF,PIK3C2A,PIK3C2B,PIK3C3,PIK3R1,PIK3R2,PIK3R5,RRAS2,SLC2A14,SLC2A3,VEGFA,VEGFB
14-3-3-mediated Signaling	1.97	AKT1,BAX,FOS,GRB2,HRAS,MAPK3,NRAS,PDIA3,PIK3C2A,PIK3C2B,PIK3C3,PIK3R1,PIK3R2,PIK3R5,PLCB3,PLCD1,PLCG2,PRKCD,PRKCE,PRKCI,PRKCZ,RAF1,RRAS2,SRC,TNF,TSC1,TUBA1A,TUBA1B,TUBA4A,TUBB4A,TUBB4B,TUBB6,TUBG1,YWHAE
CCR3 Signaling in Eosinophils	1.97	CALM1 (includes others),CALML5,CCL26,CFL1,CFL2,GNAI1,GNAI2,GNAS,GNB1L,GNG3,HRAS,ITPR1,ITPR2,ITPR3,LIMK1,LIMK2,MAPK3,NRAS,PAK2,PIK3C2A,PIK3C2B,PIK3C3,PIK3R1,PIK3R2,PIK3R5,PLCB3,PRKCD,PRKCE,PRKCI,PRKCZ,RAC1,RAF1,ROCK1,RRAS2
IL-7 Signaling Pathway	1.94	AKT1,BAX,BCL2,CDC25A,CXCR5,GRB2,HGF,JAK1,LYN,MAPK3,NFATC1,PDPK1,PIK3C2A,PIK3C2B,PIK3C3,PIK3R1,PIK3R2,PIK3R5,SHC1,SOS1,SOS2,STAT1,STAT5A
Role of IL-17F in Allergic Inflammatory Airway Diseases	1.92	ATF2,ATF4,CREB1,CREB3,CREBBP,CXCL1,IL17RC,MAPK3,RAF1,RELA,RPS6KA3,RPS6KA4,TRAF3IP2,TRAF6
Th1 and Th2 Activation Pathway	1.92	ACVR1B,ACVR2B,APH1A,BMPR2,CD274,CD40,CD80,CXCR3,GRB2,HLA-DMA,HLA-DMB,ICAM1,ICOSLG/LOC102723996,IFNGR1,IFNGR2,IL10RB,IL12RB1,IL25,IL2RA,ITGB2,JAG1,JAK1,LTA,NFATC1,NFATC3,NOTCH1,PIK3C2A,PIK3C2B,PIK3C3,PIK3R1,PIK3R2,PIK3R5,PSEN1,PSEN2,PSENEN,RUNX3,S1PR1,STAT1,STAT3,STAT5A,TBX21,TNFRSF4,TSLP
IL-15 Production	1.91	AATK,ABL1,ABL2,BTK,CLK1,CLK2,CLK3,CLK4,DDR1,DYRK1A,DYRK4,EPHA5,EPHA6,EPHB2,FGR,IL15,INSR,JAK1,LCK,LMTK2,LYN,MAP2K3,PRKCI,PRKCZ,RELA,RYK,SRC,STAT1,SYK,TEC,TNK2,TWF1
PKCθ Signaling in T Lymphocytes	1.87	CACNA1C,CAMK2B,CAMK2D,CAMK2G,CARD11,CD80,FOS,GRB2,HLA-DMA,HLA-DMB,HRAS,LCK,LCP2,MAP3K12,MAP3K4,MAP3K6,MAP3K7,MAP3K8,MAPK3,NFAT5,NFATC1,NFATC3,NFKBIB,NFKBID,NRAS,PIK3C2A,PIK3C2B,PIK3C3,PIK3R1,PIK3R2,PIK3R5,PLCG2,PPP3CA,PPP3CB,PPP3CC,RAC1,RELA,RRAS2,SOS1,SOS2
VEGF Family Ligand-Receptor Interactions	1.87	AKT1,FOS,GRB2,HRAS,MAPK3,NRAS,PGF,PIK3C2A,PIK3C2B,PIK3C3,PIK3R1,PIK3R2,PIK3R5,PLCG2,PRKCD,PRKCE,PRKCI,PRKCZ,RAF1,RRAS2,SHC1,SOS1,SOS2,VEGFA,VEGFB
Signaling by Rho Family GTPases	1.84	ACTR3,ARFIP2,ARHGEF1,ARHGEF12,ARHGEF16,ARHGEF17,ARHGEF2,ARHGEF6,ARHGEF7,ARHGEF9,ARPC2,ARPC5,CDC42,CDC42EP1,CFL1,CFL2,DIAPH3,FOS,GNA12,GNA13,GNAI1,GNAI2,GNAO1,GNAS,GNB1L,GNG3,IQGAP1,ITGA4,ITGB1,LIMK1,LIMK2,MAP3K12,MAPK3,MSN,NEDD4,PAK2,PIK3C2A,PIK3C2B,PIK3C3,PIK3R1,PIK3R2,PIK3R5,PIKFYVE,PKN1,PRKCI,PRKCZ,RAC1,RAF1,RELA,RHOT1,RHOV,RND2,ROCK1,SEPTIN4,STMN1,WAS,WASL,WIPF1
Neuroinflammation Signaling Pathway	1.83	ACVR1B,ACVR2B,AGER,AKT1,APH1A,ATF2,ATF4,BCL2,BDNF,BIRC3,BIRC5,BMPR2,CALB2,CASP8,CD40,CD80,CFLAR,CREB1,CREB3,CREBBP,CTNNB1,FAS,FOS,FZD1,GABRA6,GABRB3,GRIA1,GRIN2B,GRINA,HLA-DMA,HLA-DMB,HLA-F,ICAM1,IFNGR1,IFNGR2,IRAK2,IRF7,JAK1,KLK3,MAPK15,MAPK3,MAPK6,MYD88,NFAT5,NFATC1,NFATC3,P2RX7,PIK3C2A,PIK3C2B,PIK3C3,PIK3R1,PIK3R2,PIK3R5,PLCG2,PPP3CA,PPP3CB,PPP3CC,PSEN1,PSEN2,PSENEN,PYCARD,RELA,RIPK1,SOD2,STAT…
DNA Methylation and Transcriptional Repression Signaling	1.82	ARID4B,CHD3,DNMT3A,H3-3A/H3-3B,H4C14,H4C3,HDAC2,MBD3,MTA1,MTA2,RBBP7,SIN3A
Death Receptor Signaling	1.8	ARHGDIB,BCL2,BID,BIRC3,CASP8,CFLAR,DFFA,DIABLO,FADD,FAS,LIMK1,NFKBIB,NFKBID,PARP1,PARP10,PARP11,PARP4,PARP6,RELA,RIPK1,ROCK1,TIPARP,TNF,TNKS,TNKS2
P2Y Purigenic Receptor Signaling Pathway	1.8	ADCY2,ADCY3,ADCY7,AKT1,ATF2,ATF4,CREB1,CREB3,CREBBP,FOS,GNAI1,GNAI2,GNB1L,GNG3,HRAS,MAPK3,NRAS,P2RY11,PDIA3,PIK3C2A,PIK3C2B,PIK3C3,PIK3R1,PIK3R2,PIK3R5,PLCB3,PLCD1,PLCG2,PRKCD,PRKCE,PRKCI,PRKCZ,RAF1,RELA,RRAS2
PTEN Signaling	1.79	AKT1,BCL2,BMPR2,CDC42,CDKN1A,CSNK2A1,CSNK2A2,CSNK2B,GRB2,HRAS,ILK,INSR,ITGA4,ITGB1,MAGI1,MAPK3,MAST2,MCRS1,NGFR,NRAS,PDPK1,PIK3R1,PIK3R2,PIK3R5,PRKCZ,RAC1,RAF1,RELA,RPS6KB2,RRAS2,SHC1,SOS1,SOS2
Systemic Lupus Erythematosus Signaling	1.78	AKT1,C5,C7,C8A,CD40,CD79A,CD79B,CD80,EFTUD2,FOS,GRB2,HLA-F,HNRNPA2B1,HNRNPC,HRAS,IL37,LCK,LSM1,LSM14A,LSM14B,LSM2,LSM5,LSM6,LYN,MAPK3,NFAT5,NFATC1,NFATC3,NRAS,PIK3C2A,PIK3C2B,PIK3C3,PIK3R1,PIK3R2,PIK3R5,PIM2,PLCG2,PRPF19,PRPF3,PRPF38A,PRPF39,PRPF4B,RRAS2,SF3B4,SNRNP35,SNRNP70,SNRPA,SNRPB,SNRPD1,SNRPN,SOS1,SOS2,TLR7,TNF,ZCRB1
UVB-Induced MAPK Signaling	1.77	AKT1,EIF4E,FOS,H3-3A/H3-3B,MAPK3,PIK3C2A,PIK3C2B,PIK3C3,PIK3R1,PIK3R2,PIK3R5,PRKCD,PRKCE,PRKCI,PRKCZ,RPS6KA3
IL-4 Signaling	1.77	AKT1,FCER2,GRB2,HLA-DMA,HLA-DMB,HMGA1,HRAS,JAK1,NFAT5,NFATC1,NFATC3,NR3C1,NRAS,PIK3C2A,PIK3C2B,PIK3C3,PIK3R1,PIK3R2,PIK3R5,RPS6KB2,RRAS2,SHC1,SOS1,SOS2
Role of NANOG in Mammalian Embryonic Stem Cell Pluripotency	1.77	AKT1,AXIN1,BMP4,BMP6,BMPR2,CDX2,CTNNB1,FZD1,GAB1,GRB2,HRAS,IL6ST,JAK1,MAPK3,NRAS,PIK3C2A,PIK3C2B,PIK3C3,PIK3R1,PIK3R2,PIK3R5,RAF1,RIF1,RRAS2,SHC1,SMAD4,SOS1,SOS2,STAT3,TCL1A,WNT9B
ErbB2-ErbB3 Signaling	1.77	AKT1,GRB2,HRAS,MAPK3,NRAS,PDPK1,PIK3C2A,PIK3C2B,PIK3C3,PIK3R1,PIK3R2,PIK3R5,RAF1,RRAS2,SHC1,SOS1,SOS2,STAT3,STAT5A
Autophagy	1.77	ATG10,ATG16L1,ATG4A,ATG7,ATG9A,BCL2,CTSD,CTSL,CTSO,CTSZ,LAMP1,LAMP2,MAP1LC3B,NBR1,PIK3C3,ULK1,VPS16,VPS33B,VPS39
BER pathway	1.75	FEN1,LIG1,PARP1,PCNA,PNKP,POLG
IL-23 Signaling Pathway	1.74	AKT1,HIF1A,IL12RB1,PIK3C2A,PIK3C2B,PIK3C3,PIK3R1,PIK3R2,PIK3R5,RELA,RORA,RORC,STAT3,TNF
Role of JAK1, JAK2 and TYK2 in Interferon Signaling	1.73	CGA,IFNGR1,IFNGR2,JAK1,PTPN2,RAF1,RELA,STAT1,STAT3
eNOS Signaling	1.72	ADCY2,ADCY3,ADCY7,AKT1,AQP3,CALM1 (includes others),CALML5,CASP8,CCNA2,CHRNA5,CHRNA9,CHRNB3,CNGA3,GNAS,HSP90AB1,HSPA1A/HSPA1B,HSPA1L,HSPA4,HSPA9,ITPR1,ITPR2,ITPR3,LPAR5,PDPK1,PGF,PIK3C2A,PIK3C2B,PIK3C3,PIK3R1,PIK3R2,PIK3R5,PLCG2,PRKAA1,PRKAB1,PRKAB2,PRKCD,PRKCE,PRKCI,PRKCZ,SLC7A1,VEGFA,VEGFB
Breast Cancer Regulation by Stathmin1	1.68	ADGRA3,ADGRG4,ADGRG5,ADORA2A,ADORA3,ADRA1D,ADRA2B,AGTR1,ARHGEF1,ARHGEF12,ARHGEF16,ARHGEF17,ARHGEF2,ARHGEF6,ARHGEF7,ARHGEF9,ATF2,ATF4,AURKB,BMP6,CAMK2B,CAMK2D,CAMK2G,CDK1,CDK4,CREB1,CREB3,CREBBP,CXCR1,CYSLTR1,DRD3,E2F2,E2F3,E2F5,F2R,F2RL3,FZD1,GNA13,GNB1L,GNG3,GPER1,GPR108,GPR137,GPR137B,GPR143,GPR149,GPR153,GPR155,GPR156,GPR19,GPR55,GPR68,GPR75,GPR84,GPR87,GPR89A/GPR89B,GRB2,GRM2,HGF,HIF1A,HRAS,H…
Leukocyte Extravasation Signaling	1.64	ABL1,ACTN4,ARHGAP35,ARHGAP9,BTK,CD99,CDC42,CLDN20,CLDN3,CLDN9,CRK,CRKL,CTNNB1,CTNND1,DLC1,GNAI1,GNAI2,ICAM1,ITGA4,ITGAL,ITGB1,ITGB2,MAP3K4,MMP1,MMP14,MMP16,MSN,PIK3C2A,PIK3C2B,PIK3C3,PIK3R1,PIK3R2,PIK3R5,PLCG2,PRKCD,PRKCE,PRKCI,PRKCZ,RAC1,RAPGEF3,RASSF5,ROCK1,SIPA1,SRC,TEC,WAS,WASL,WIPF1
Endothelin-1 Signaling	1.64	ADCY2,ADCY3,ADCY7,BRAF,CASP4,CASP8,ECE2,FOS,GAB1,GNA12,GNA13,GNAI1,GNAI2,GNAO1,GNAS,GRB2,GUCY2D,HRAS,ITPR1,ITPR2,ITPR3,MAPK15,MAPK3,MAPK6,NRAS,PDIA3,PIK3C2A,PIK3C2B,PIK3C3,PIK3R1,PIK3R2,PIK3R5,PLAAT4,PLB1,PLCB3,PLCD1,PLCG2,PLD3,PRKCD,PRKCE,PRKCI,PRKCZ,RAF1,RRAS2,SHC1,SHC3,SOS1,SRC
Wnt/β-catenin Signaling	1.64	ACVR1B,ACVR2B,AKT1,APPL2,AXIN1,BCL9,BMPR2,BTRC,CDKN2A,CREBBP,CSNK1G1,CSNK1G3,CSNK2A1,CSNK2A2,CSNK2B,CTNNB1,DKK3,DVL3,FZD1,GNAO1,ILK,MAP3K7,MAP4K1,MDM2,PIN1,PPP2CB,PPP2R1B,PPP2R2A,PPP2R2B,PPP2R2C,PPP2R3B,PPP2R5A,PPP2R5D,PTPA,RPS27A,SOX4,SOX9,SRC,TAB1,TCF7,TLE3,WNT9B
Corticotropin Releasing Hormone Signaling	1.63	ADCY2,ADCY3,ADCY7,ARPC5,ATF2,ATF4,BDNF,BRAF,CACNA1C,CALM1 (includes others),CALML5,CREB1,CREB3,CREBBP,FOS,GLI3,GNAI1,GNAI2,GNAO1,GNAS,GUCY2D,ITPR1,ITPR2,ITPR3,MAPK3,MEF2A,MEF2B,NR4A1,NT5C,PLCG2,PRKCD,PRKCE,PRKCI,PRKCZ,RAF1,SLC39A7,SMARCC2,VEGFA
IL-17A Signaling in Airway Cells	1.63	AKT1,CXCL1,CXCL3,IL17RC,JAK1,MAP3K7,MAPK3,NFKBIB,NFKBID,PIK3C2A,PIK3C2B,PIK3C3,PIK3R1,PIK3R2,PIK3R5,RELA,STAT3,TRAF3IP2,TRAF6
Notch Signaling	1.62	APH1A,HEY1,JAG1,MFNG,NOTCH1,NUMB,NUMBL,PSEN1,PSEN2,PSENEN,RBPJ,RFNG
Ovarian Cancer Signaling	1.62	ABL1,AKT1,ARRB1,AXIN1,BCL2,BRAF,BRCA1,CDK4,CDKN2A,CGA,CTNNB1,FGF9,FSHB,FZD1,HRAS,MAPK3,MLH1,NRAS,PGF,PIK3C2A,PIK3C2B,PIK3C3,PIK3R1,PIK3R2,PIK3R5,RAF1,RPS6KB2,RRAS2,SIN3A,SRC,SUV39H1,TCF7,VEGFA,VEGFB,WNT9B
Apelin Cardiomyocyte Signaling Pathway	1.59	AKT1,CAT,GNAI1,GNAI2,HIF1A,ITPR1,MAPK15,MAPK3,MAPK6,PDIA3,PIK3C2A,PIK3C2B,PIK3C3,PIK3R1,PIK3R2,PIK3R5,PLCB3,PLCD1,PLCG2,PLN,PRKCD,PRKCE,PRKCI,PRKCZ,SLC9A2,SLC9A3,SLC9A6
DNA Double-Strand Break Repair by Non-Homologous End Joining	1.58	ATM,MRE11,NBN,PARP1,PRKDC,WRN
Xenobiotic Metabolism Signaling	1.54	AHR,ALDH16A1,ALDH18A1,ALDH1A3,ALDH1B1,ALDH1L1,ALDH1L2,ALDH3A2,ALDH4A1,ALDH6A1,ANKRA2,CAMK2B,CAMK2D,CAMK2G,CAT,CES2,CHST12,CREBBP,FMO4,GSTO1,GSTP1,GSTZ1,HDAC4,HRAS,HS2ST1,HS3ST5,HSP90AB1,IL4I1,MAP2K3,MAP3K12,MAP3K4,MAP3K6,MAP3K7,MAP3K8,MAPK3,MGMT,NCOR2,NRAS,NRIP1,PIK3C2A,PIK3C2B,PIK3C3,PIK3R1,PIK3R2,PIK3R5,PPP2CB,PPP2R1B,PPP2R2A,PPP2R2B,PPP2R2C,PPP2R3B,PPP2R5A,PPP2R5D,PRKCD,PRKCE,PRKCI,PRKCZ,PTPA,…
Mismatch Repair in Eukaryotes	1.53	EXO1,FEN1,MLH1,PCNA,POLD1,RFC2,RFC3
Spliceosomal Cycle	1.49	U2AF1/U2AF1L5,U2AF2
Cardiac β-adrenergic Signaling	1.48	ADCY2,ADCY3,ADCY7,AKAP1,AKAP10,AKAP11,AKAP12,AKAP13,AKAP17A,CACNA1C,GDPD1,GNAS,GNB1L,GNG3,PDE4B,PDE6C,PDE6D,PDE6G,PDE8A,PKIA,PKIG,PLN,PPP1CC,PPP1R10,PPP1R14B,PPP1R3D,PPP1R7,PPP2CB,PPP2R1B,PPP2R2A,PPP2R2B,PPP2R2C,PPP2R3B,PPP2R5A,PPP2R5D,PTPA
Role of Pattern Recognition Receptors in Recognition of Bacteria and Viruses	1.47	C3,C5,CD70,CREB1,EIF2AK2,EIF2S1,IL15,IL25,IL37,IRF7,LTA,LTB,MAPK3,MYD88,OAS2,PIK3C2A,PIK3C2B,PIK3C3,PIK3R1,PIK3R2,PIK3R5,PLCG2,PRKCD,PRKCE,PRKCI,PRKCZ,RELA,RIPK2,RNASEL,SYK,TICAM1,TLR6,TLR7,TNF,TNFSF14,TNFSF9,TRAF6
FcγRIIB Signaling in B Lymphocytes	1.45	AKT1,BTK,CACNA1C,CD79A,CD79B,GRB2,HRAS,LYN,NRAS,PDPK1,PIK3C2A,PIK3C2B,PIK3C3,PIK3R1,PIK3R2,PIK3R5,PLCG2,RRAS2,SHC1,SOS1,SYK
PD-1, PD-L1 cancer immunotherapy pathway	1.44	AKT1,CBLB,CD274,CD80,CSNK2A1,CSNK2A2,CSNK2B,HLA-DMA,HLA-DMB,HLA-F,IFNGR1,IFNGR2,IL2RA,JAK1,LCK,LCP2,NGFR,PDCD1LG2,PIK3C2A,PIK3C2B,PIK3C3,PIK3R1,PIK3R2,PIK3R5,SKP2,STAT5A,TNF
Relaxin Signaling	1.43	ADCY2,ADCY3,ADCY7,AKT1,BRAF,CREB1,FOS,GDPD1,GNA12,GNA13,GNAI1,GNAI2,GNAO1,GNAS,GNB1L,GNG3,GUCY2D,MAPK3,NFKBIB,NFKBID,NT5C,PDE4B,PDE6C,PDE6D,PDE6G,PDE8A,PIK3C2A,PIK3C2B,PIK3C3,PIK3R1,PIK3R2,PIK3R5,PRKCZ,RELA,RLN2,SLC39A7,SMARCC2,VEGFA
IL-17A Signaling in Fibroblasts	1.43	FOS,IL17RC,MAP3K7,MAPK3,MMP1,NFKBIB,NFKBID,NFKBIZ,RELA,TRAF3IP2,TRAF6
Th2 Pathway	1.42	ACVR1B,ACVR2B,APH1A,BMPR2,CD40,CD80,GRB2,HLA-DMA,HLA-DMB,ICAM1,ICOSLG/LOC102723996,IL12RB1,IL25,IL2RA,ITGB2,JAG1,JAK1,NOTCH1,PIK3C2A,PIK3C2B,PIK3C3,PIK3R1,PIK3R2,PIK3R5,PSEN1,PSEN2,PSENEN,RUNX3,S1PR1,STAT5A,TBX21,TNFRSF4,TSLP
Telomere Extension by Telomerase	1.42	HNRNPA2B1,MRE11,NBN,POT1,TNKS,TNKS2
Role of IL-17A in Arthritis	1.41	ATF2,CXCL1,CXCL3,IL17RC,MAP2K3,MAPK3,MMP1,NFKBIB,NFKBID,PIK3C2A,PIK3C2B,PIK3C3,PIK3R1,PIK3R2,PIK3R5,RELA
Regulation of Cellular Mechanics by Calpain Protease	1.41	ACTN4,CAPN1,CAPN10,CAPN3,CCNA2,CCNE1,CDK1,CDK4,CNGA3,GRB2,HRAS,ITGA4,ITGB1,MAPK3,NRAS,RRAS2,SRC,TLN1
Docosahexaenoic Acid (DHA) Signaling	1.39	AKT1,BAX,BCL2,BCL2A1,BID,PDPK1,PIK3C2A,PIK3C2B,PIK3C3,PIK3R1,PIK3R2,PIK3R5,PNPLA2
RhoGDI Signaling	1.37	ACTR3,ARHGAP35,ARHGAP9,ARHGDIA,ARHGDIB,ARHGEF1,ARHGEF12,ARHGEF16,ARHGEF17,ARHGEF2,ARHGEF6,ARHGEF7,ARHGEF9,ARPC2,ARPC5,CDC42,CFL1,CFL2,CREBBP,DLC1,GNA12,GNA13,GNAI1,GNAI2,GNAO1,GNAS,GNB1L,GNG3,ITGA4,ITGB1,LIMK1,LIMK2,MSN,PAK2,PIKFYVE,RAC1,RHOT1,RHOV,RND2,ROCK1,SRC,WASF2,WASL
Phagosome Maturation	1.32	ATP6V0C,ATP6V0E1,ATP6V1E1,ATP6V1E2,CANX,CTSD,CTSL,CTSO,CTSZ,DCTN4,DYNC2H1,DYNLRB1,EEA1,HLA-F,LAMP1,LAMP2,NAPB,NAPG,PIK3C3,PIKFYVE,RAB5B,RAB5C,RAB7A,TUBA1A,TUBA1B,TUBA4A,TUBB4A,TUBB4B,TUBB6,TUBG1,VAMP2,VAMP3,VPS16,VPS33B,VPS39,VTI1B,YKT6
BAG2 Signaling Pathway	1.32	CDKN1A,HSPA1A/HSPA1B,HSPA1L,HSPA4,HSPA9,MAPK3,MDM2,PSME1,PSME3,PSME4,RELA,SIRT3,UBE2D1
Assembly of RNA Polymerase I Complex	1.32	POLR1C,POLR1D,POLR2F,TAF1B,UBTF
Toll-like Receptor Signaling	1.31	ECSIT,EIF2AK2,FOS,IL37,IRAK2,LBP,MAP2K3,MAP3K7,MYD88,PPARA,RELA,RPS27A,TAB1,TICAM1,TICAM2,TLR6,TLR7,TNF,TRAF1,TRAF6
*Negative logarithm of the Fisher Exact p-value which represents the probability that the pathway is not over-represented among the respective dataset of genes, where a value of 1.3 is equivalent to a p-value of 0.05.

## Sheet: Social
Ingenuity Canonical Pathways	-log(p-value)*	Molecules
Assembly of RNA Polymerase II Complex	5.81	CCNH,ERCC3,GTF2H2,MNAT1,POLR2J2/POLR2J3,POLR2K,TAF9
Nucleotide Excision Repair Pathway	5.59	CCNH,ERCC3,GTF2H2,MNAT1,POLR2J2/POLR2J3,POLR2K
Mitotic Roles of Polo-Like Kinase	4.99	CCNB1,CDK1,FBXO5,KIF11,PPP2CB,PPP2R2B,SMC3
NER Pathway	3.63	CCNH,ERCC3,GTF2H2,MNAT1,PCNA,POLR2J2/POLR2J3,POLR2K
Cyclins and Cell Cycle Regulation	3.48	CCNB1,CCNH,CDK1,HDAC2,PPP2CB,PPP2R2B
Rac Signaling	3.44	ACTR3,ARPC5,IQGAP1,PAK2,PIK3C3,PRKCI,RRAS2
Senescence Pathway	3.39	CAT,CCNB1,CDK1,EIF4E,PCGF6,PIK3C3,PPP2CB,PPP2R2B,PPP3CA,RRAS2,ZFP36L1
ERK/MAPK Signaling	3.34	ATF1,EIF4E,PAK2,PIK3C3,PPP2CB,PPP2R2B,PRKCI,RRAS2,VRK2
ATM Signaling	3.06	ATF1,CCNB1,CDK1,PPP2CB,PPP2R2B,SMC3
Adipogenesis pathway	3.03	CCNH,ERCC3,GTF2H2,HAT1,HDAC2,MNAT1,RBBP7
Androgen Signaling	2.95	CCNH,ERCC3,GTF2H2,MNAT1,POLR2J2/POLR2J3,POLR2K,PRKCI
GADD45 Signaling	2.9	CCNB1,CDK1,PCNA
Hereditary Breast Cancer Signaling	2.9	CCNB1,CDK1,HDAC2,PIK3C3,POLR2J2/POLR2J3,POLR2K,RRAS2
Systemic Lupus Erythematosus Signaling	2.82	C8A,HNRNPA2B1,HNRNPC,LSM14A,LSM5,LSM6,PIK3C3,PRPF38A,RRAS2
Glucocorticoid Receptor Signaling	2.69	CCNH,ERCC3,GTF2H2,MNAT1,PIK3C3,POLR2J2/POLR2J3,POLR2K,PPP3CA,RRAS2,SUMO1,TAF9
fMLP Signaling in Neutrophils	2.53	ACTR3,ARPC5,PIK3C3,PPP3CA,PRKCI,RRAS2
Role of CHK Proteins in Cell Cycle Checkpoint Control	2.39	CDK1,PCNA,PPP2CB,PPP2R2B
3-phosphoinositide Biosynthesis	2.35	DUSP11,MINPP1,MTMR6,NUDT15,PI4K2B,PIK3C3,PPP3CA
Cardiac β-adrenergic Signaling	2.13	ADCY2,AKAP1,GDPD1,PKIA,PPP2CB,PPP2R2B
Clathrin-mediated Endocytosis Signaling	2.12	ACTR3,ARPC5,CLTC,FGF9,PIK3C3,PON1,PPP3CA
Remodeling of Epithelial Adherens Junctions	2.12	ACTR3,ARPC5,IQGAP1,TUBA4A
Telomerase Signaling	2.11	HDAC2,PIK3C3,PPP2CB,PPP2R2B,RRAS2
ErbB4 Signaling	2.09	APH1A,PIK3C3,PRKCI,RRAS2
Epithelial Adherens Junction Signaling	2.06	ACTR3,ARPC5,IQGAP1,NECTIN3,RRAS2,TUBA4A
Actin Nucleation by ARP-WASP Complex	2.03	ACTR3,ARPC5,RRAS2,WIPF1
Regulation of eIF4 and p70S6K Signaling	1.97	EIF3M,EIF4E,PIK3C3,PPP2CB,PPP2R2B,RRAS2
mTOR Signaling	1.91	EIF3M,EIF4E,PIK3C3,PPP2CB,PPP2R2B,PRKCI,RRAS2
IL-3 Signaling	1.89	PIK3C3,PPP3CA,PRKCI,RRAS2
Cdc42 Signaling	1.88	ACTR3,ARPC5,IQGAP1,PAK2,PRKCI,WIPF1
Actin Cytoskeleton Signaling	1.85	ACTR3,ARPC5,FGF9,IQGAP1,PAK2,PIK3C3,RRAS2
Superpathway of Inositol Phosphate Compounds	1.84	DUSP11,MINPP1,MTMR6,NUDT15,PI4K2B,PIK3C3,PPP3CA
LPS-stimulated MAPK Signaling	1.84	ATF1,PIK3C3,PRKCI,RRAS2
Germ Cell-Sertoli Cell Junction Signaling	1.82	IQGAP1,NECTIN3,PAK2,PIK3C3,RRAS2,TUBA4A
Renin-Angiotensin Signaling	1.81	ADCY2,PAK2,PIK3C3,PRKCI,RRAS2
Prolactin Signaling	1.8	NMI,PIK3C3,PRKCI,RRAS2
Dopamine-DARPP32 Feedback in cAMP Signaling	1.79	ADCY2,ATF1,PPP2CB,PPP2R2B,PPP3CA,PRKCI
Cell Cycle: G2/M DNA Damage Checkpoint Regulation	1.73	CCNB1,CDK1,CKS2
Xenobiotic Metabolism Signaling	1.72	CAT,HS2ST1,PIK3C3,PPP2CB,PPP2R2B,PRKCI,RRAS2,SUMO1
CTLA4 Signaling in Cytotoxic T Lymphocytes	1.72	CLTC,PIK3C3,PPP2CB,PPP2R2B
RAN Signaling	1.71	KPNB1,RANBP1
p70S6K Signaling	1.71	PIK3C3,PPP2CB,PPP2R2B,PRKCI,RRAS2
DNA damage-induced 14-3-3σ Signaling	1.71	CCNB1,CDK1
Mitochondrial Dysfunction	1.67	APH1A,CAT,COX7B,GLRX2,NDUFB10,UQCRB
Ceramide Signaling	1.67	PIK3C3,PPP2CB,PPP2R2B,RRAS2
Pyrimidine Ribonucleotides Interconversion	1.67	NME5,NME7,NUDT15
UVB-Induced MAPK Signaling	1.67	EIF4E,PIK3C3,PRKCI
NRF2-mediated Oxidative Stress Response	1.66	ABCC4,CAT,GCLM,PIK3C3,PRKCI,RRAS2
Huntington's Disease Signaling	1.66	CLTC,HDAC2,PIK3C3,POLR2J2/POLR2J3,POLR2K,PRKCI,VTI1B
Spliceosomal Cycle	1.64	U2AF1/U2AF1L5
ErbB Signaling	1.64	PAK2,PIK3C3,PRKCI,RRAS2
Signaling by Rho Family GTPases	1.63	ACTR3,ARPC5,IQGAP1,PAK2,PIK3C3,PRKCI,WIPF1
Production of Nitric Oxide and Reactive Oxygen Species in Macrophages	1.61	CAT,PIK3C3,PON1,PPP2CB,PPP2R2B,PRKCI
Regulation of Actin-based Motility by Rho	1.61	ACTR3,ARPC5,PAK2,WIPF1
FAK Signaling	1.58	HMMR,PAK2,PIK3C3,RRAS2
D-myo-inositol (1,4,5,6)-Tetrakisphosphate Biosynthesis	1.56	DUSP11,MINPP1,MTMR6,NUDT15,PPP3CA
D-myo-inositol (3,4,5,6)-tetrakisphosphate Biosynthesis	1.56	DUSP11,MINPP1,MTMR6,NUDT15,PPP3CA
RAR Activation	1.55	ADCY2,CCNH,ERCC3,GTF2H2,MNAT1,PRKCI
Glutamate Removal from Folates	1.47	GGH
Gap Junction Signaling	1.46	ADCY2,PIK3C3,PPP3CA,PRKCI,RRAS2,TUBA4A
Phagosome Maturation	1.45	CTSO,PIK3C3,TUBA4A,VPS39,VTI1B
Integrin Signaling	1.43	ACTR3,ARPC5,PAK2,PIK3C3,RRAS2,WIPF1
CREB Signaling in Neurons	1.42	ADCY2,PIK3C3,POLR2J2/POLR2J3,POLR2K,PRKCI,RRAS2
Pyrimidine Ribonucleotides De Novo Biosynthesis	1.42	NME5,NME7,NUDT15
Autophagy	1.42	CTSO,PIK3C3,VPS39
3-phosphoinositide Degradation	1.41	DUSP11,MINPP1,MTMR6,NUDT15,PPP3CA
D-myo-inositol-5-phosphate Metabolism	1.4	DUSP11,MINPP1,MTMR6,NUDT15,PPP3CA
CDK5 Signaling	1.4	ADCY2,PPP2CB,PPP2R2B,RRAS2
Virus Entry via Endocytic Pathways	1.39	CLTC,PIK3C3,PRKCI,RRAS2
Thrombopoietin Signaling	1.38	PIK3C3,PRKCI,RRAS2
Role of NFAT in Cardiac Hypertrophy	1.38	ADCY2,HDAC2,PIK3C3,PPP3CA,PRKCI,RRAS2
Salvage Pathways of Pyrimidine Ribonucleotides	1.38	CDK1,NME5,NME7,PAK2
Tight Junction Signaling	1.36	NECTIN3,PPP2CB,PPP2R2B,PRKCI,VTI1B
Sonic Hedgehog Signaling	1.34	CCNB1,CDK1
Calcium-induced T Lymphocyte Apoptosis	1.34	HDAC2,PPP3CA,PRKCI
GM-CSF Signaling	1.32	PIK3C3,PPP3CA,RRAS2
*Negative logarithm of the Fisher Exact p-value which represents the probability that the pathway is not over-represented among the respective dataset of genes, where a value of 1.3 is equivalent to a p-value of 0.05.

## Sheet: All traits
Ingenuity Canonical Pathways	-log(p-value)*	Molecules
ATM Signaling	13.3	ABL1,ATF1,ATF2,ATF4,ATM,BID,BLM,BRAT1,BRCA1,CCNB1,CDC25A,CDC25C,CDK1,CDKN1A,CHEK2,CREB1,CREB3,CREBBP,FANCD2,GADD45A,GADD45B,GADD45G,H2AX,HP1BP3,KAT5,MDM2,MDM4,MRE11,NBN,PPP1CC,PPP2CB,PPP2R1B,PPP2R2A,PPP2R2B,PPP2R2C,PPP2R3B,PPP2R5A,PPP2R5C,PPP2R5D,PTPA,RAD17,RAD9A,RBBP8,SMC2,SMC3,SUV39H1,TDP1,TLK2,TP53BP1,USP7,ZEB1
Molecular Mechanisms of Cancer	11.3	ABL1,ADCY2,ADCY3,ADCY7,AKT1,APH1A,ARHGEF1,ARHGEF12,ARHGEF16,ARHGEF17,ARHGEF2,ARHGEF6,ARHGEF7,ARHGEF9,ATM,AXIN1,BAX,BBC3,BCL2,BID,BIRC3,BMP4,BMP6,BMPR2,BRAF,BRCA1,CAMK2B,CAMK2D,CAMK2G,CASP6,CASP8,CCNE1,CCNE2,CDC25A,CDC25C,CDC42,CDK1,CDK13,CDK17,CDK19,CDK4,CDK5,CDK7,CDK8,CDK9,CDKN1A,CDKN2A,CFLAR,CHEK2,CREBBP,CRK,CTNNB1,CTNND1,DIABLO,E2F2,E2F3,E2F5,FADD,FANCD2,FAS,FOS,FZD1,GAB1,GAB2,GNA12,GNA13,GNAI…
Regulation of eIF4 and p70S6K Signaling	11	AGO3,AKT1,EIF1,EIF2A,EIF2B1,EIF2B5,EIF2S1,EIF3A,EIF3B,EIF3C,EIF3H,EIF3L,EIF3M,EIF4A1,EIF4A2,EIF4A3,EIF4E,EIF4G1,EIF4G2,GRB2,HRAS,ITGA4,ITGB1,MAPK3,MKNK1,NRAS,PABPC1,PAIP2,PDPK1,PIK3C2A,PIK3C2B,PIK3C3,PIK3R1,PIK3R2,PIK3R5,PPP2CB,PPP2R1B,PPP2R2A,PPP2R2B,PPP2R2C,PPP2R3B,PPP2R5A,PPP2R5C,PPP2R5D,PRKCZ,PTPA,RAF1,RAP1B,RPS13,RPS15A,RPS16,RPS17,RPS19,RPS2,RPS20,RPS24,RPS27,RPS27A,RPS28,RPS29,RPS3,RPS4Y1,…
Senescence Pathway	10.8	ACVR1B,ACVR2B,AKT1,ANAPC1,ANAPC11,ATF3,ATM,BMPR2,BRAF,CACNA1C,CALM1 (includes others),CALML5,CAPN1,CAPN10,CAPN3,CAT,CBX2,CCNB1,CDC25A,CDC25C,CDK1,CDK4,CDKN1A,CDKN2A,CHEK2,CREBBP,DHCR24,E2F2,E2F3,E2F5,EED,EIF4E,ELF2,ETS1,GADD45A,GADD45B,GADD45G,HBP1,HIPK2,HRAS,ING1,ITPR2,ITPR3,MAP2K3,MAP3K7,MAPK15,MAPK3,MAPK6,MAPKAPK3,MAPKAPK5,MCU,MDM2,MRE11,NBN,NF1,NFAT5,NFATC1,NFATC3,NRAS,PARP1,PCGF1,PCGF6,PDHA1…
Hypoxia Signaling in the Cardiovascular System	9.71	AKT1,ATF2,ATF4,ATM,CDC34,COPS5,CREB1,CREB3,CREBBP,HIF1A,HIF1AN,HSP90AB1,LDHA,MDM2,NFKBIB,NFKBID,SUMO1,UBE2A,UBE2D1,UBE2D2,UBE2D3,UBE2D4,UBE2E1,UBE2G1,UBE2G2,UBE2I,UBE2J1,UBE2J2,UBE2L3,UBE2L6,UBE2M,UBE2N,UBE2Q1,UBE2Q2,UBE2T,UBE2V1,UBE2Z,VEGFA
EIF2 Signaling	9.55	AGO3,AKT1,ATF3,ATF4,BCL2,DDIT3,EIF1,EIF2A,EIF2AK2,EIF2B1,EIF2B5,EIF2S1,EIF3A,EIF3B,EIF3C,EIF3H,EIF3L,EIF3M,EIF4A1,EIF4A2,EIF4A3,EIF4E,EIF4G1,EIF4G2,EIF5,EIF5B,GRB2,HRAS,INSR,MAPK3,NRAS,PABPC1,PDPK1,PIK3C2A,PIK3C2B,PIK3C3,PIK3R1,PIK3R2,PIK3R5,PPP1CC,PPP1R15A,RAF1,RAP1B,RPL10,RPL11,RPL14,RPL17,RPL18,RPL18A,RPL23,RPL24,RPL3,RPL32,RPL35,RPL38,RPL4,RPL41,RPL5,RPL8,RPL9,RPS13,RPS15A,RPS16,RPS17,RPS19,R…
mTOR Signaling	9.11	AKT1,CDC42,EIF3A,EIF3B,EIF3C,EIF3H,EIF3L,EIF3M,EIF4A1,EIF4A2,EIF4A3,EIF4B,EIF4E,EIF4G1,EIF4G2,GNB1L,HIF1A,HRAS,INSR,MAPK3,NRAS,PDPK1,PGF,PIK3C2A,PIK3C2B,PIK3C3,PIK3R1,PIK3R2,PIK3R5,PLD3,PPP2CB,PPP2R1B,PPP2R2A,PPP2R2B,PPP2R2C,PPP2R3B,PPP2R5A,PPP2R5C,PPP2R5D,PRKAA1,PRKAB1,PRKAB2,PRKCD,PRKCE,PRKCI,PRKCZ,PTPA,RAC1,RAP1B,RHEB,RHOT1,RHOV,RND2,RPS13,RPS15A,RPS16,RPS17,RPS19,RPS2,RPS20,RPS24,RPS27,RPS27A…
Protein Ubiquitination Pathway	8.8	AMFR,ANAPC1,ANAPC11,B2M,BIRC3,BRCA1,BTRC,CDC20,CDC34,CRYAB,CUL2,DNAJB1,DNAJB12,DNAJB14,DNAJB6,DNAJB9,DNAJC10,DNAJC15,DNAJC17,DNAJC18,DNAJC19,DNAJC21,DNAJC25,DNAJC27,DNAJC3,DNAJC5,HLA-F,HSP90AB1,HSPA1A/HSPA1B,HSPA1L,HSPA4,HSPA4L,HSPA9,HSPB6,HSPE1,HSPH1,MDM2,NEDD4,PSMA2,PSMA3,PSMB10,PSMB4,PSMB8,PSMC3,PSMC5,PSMD5,PSMD6,PSMD8,PSME1,RPS27A,SACS,SASS6,SKP2,TRAF6,UBE2A,UBE2D1,UBE2D2,UBE2D3,UBE2D4,UBE2E1…
Cyclins and Cell Cycle Regulation	7.68	ABL1,ATM,BTRC,CCNA2,CCNB1,CCNE1,CCNE2,CCNH,CDC25A,CDK1,CDK4,CDK7,CDKN1A,CDKN2A,E2F2,E2F3,E2F5,FBXL5,HDAC2,HDAC4,HDAC8,HDAC9,MYT1,PPP2CB,PPP2R1B,PPP2R2A,PPP2R2B,PPP2R2C,PPP2R3B,PPP2R5A,PPP2R5C,PPP2R5D,PTPA,RAF1,SIN3A,SKP2,SUV39H1
p53 Signaling	7.62	AKT1,ATM,BAX,BBC3,BCL2,BIRC5,BRCA1,CASP6,CDK4,CDKN1A,CDKN2A,CHEK2,COQ8A,CTNNB1,FAS,GADD45A,GADD45B,GADD45G,GML,GNL3,HDAC9,HIF1A,HIPK2,JMY,MDM2,MDM4,MED1,PCNA,PIAS1,PIK3C2A,PIK3C2B,PIK3C3,PIK3R1,PIK3R2,PIK3R5,PMAIP1,PML,PRKDC,SCO2,TP53I3,TP53INP1,TRIM29
Role of CHK Proteins in Cell Cycle Checkpoint Control	7.45	ATM,ATMIN,BRCA1,CDC25A,CDC25C,CDK1,CDKN1A,CHEK2,E2F2,E2F3,E2F5,MRE11,NBN,PCNA,PPP2CB,PPP2R1B,PPP2R2A,PPP2R2B,PPP2R2C,PPP2R3B,PPP2R5A,PPP2R5C,PPP2R5D,PTPA,RAD17,RAD9A,RFC2,RFC3,TLK2
Ephrin Receptor Signaling	7.4	ABI1,ABL1,ACP1,ACTR3,AKT1,ARPC2,ARPC5,ATF2,ATF4,AXIN1,CDC42,CFL1,CFL2,CREB1,CREB3,CREBBP,CRK,CRKL,EFNA1,EFNA4,EFNB2,EPHA5,EPHA6,EPHB2,FGF1,GNA12,GNA13,GNAI1,GNAI2,GNAO1,GNAS,GNB1L,GNG3,GRB2,GRIN2B,GRINA,HRAS,ITGA4,ITGB1,KALRN,LIMK1,LIMK2,MAPK3,NCK1,NCK2,NRAS,PAK2,PGF,RAC1,RAF1,RAP1B,RASA1,ROCK1,RRAS2,SDCBP,SHC1,SOS1,SOS2,SRC,STAT3,VEGFA,VEGFB,WAS,WASL,WIPF1
ERK/MAPK Signaling	7.15	ATF1,ATF2,ATF4,BRAF,CREB1,CREB3,CREBBP,CRK,CRKL,DUSP1,DUSP4,EIF4E,ELF2,ETS1,FOS,GRB2,H3-3A/H3-3B,HRAS,ITGA4,ITGB1,KSR1,MAPK3,MAPKAPK5,MKNK1,MKNK2,NFATC1,NRAS,PAK2,PIK3C2A,PIK3C2B,PIK3C3,PIK3R1,PIK3R2,PIK3R5,PLCG2,PPP1CC,PPP1R10,PPP1R14B,PPP1R3D,PPP1R7,PPP2CB,PPP2R1B,PPP2R2A,PPP2R2B,PPP2R2C,PPP2R3B,PPP2R5A,PPP2R5C,PPP2R5D,PRKCD,PRKCE,PRKCI,PTPA,RAC1,RAF1,RAP1B,RAPGEF3,RPS6KA4,RRAS2,SHC1,SOS1,SOS2,…
p70S6K Signaling	6.92	AGTR1,AKT1,BCAP31,BTK,CD79A,CD79B,F2R,F2RL3,GNAI1,GNAI2,GRB2,HRAS,JAK1,LYN,MAPK3,NRAS,PDIA3,PDPK1,PIK3C2A,PIK3C2B,PIK3C3,PIK3R1,PIK3R2,PIK3R5,PLCB3,PLCD1,PLCG2,PPP2CB,PPP2R1B,PPP2R2A,PPP2R2B,PPP2R2C,PPP2R3B,PPP2R5A,PPP2R5C,PPP2R5D,PRKCD,PRKCE,PRKCI,PRKCZ,PTPA,RAF1,RAP1B,RRAS2,SHC1,SOS1,SOS2,SRC,SYK,YWHAE,YWHAG
Estrogen Receptor Signaling	6.63	ADCY2,ADCY3,ADCY7,AKT1,ATF2,ATF4,ATP5MC1,BCL2,CACNA1C,CDK8,CDKN1A,CFL1,CFL2,CREB1,CREB3,CREBBP,CTBP1,EIF2B1,EIF2B5,EIF4E,FBXO32,FOS,GNA12,GNA13,GNAI1,GNAI2,GNAO1,GNAS,GPER1,GRB2,HIF1A,HNRNPD,HRAS,HSP90AB1,JAK1,LEPR,LIMK1,LIMK2,MAPK3,MCU,MDK,MED1,MED10,MED13,MED15,MED16,MED23,MED24,MED4,MMP1,MMP14,MMP16,NCOA2,NCOA3,NCOR1,NCOR2,NOTCH1,NR3C1,NRAS,NRIP1,PCNA,PDIA3,PGF,PIK3C2A,PIK3C2B,PIK3C3,PIK3R1,PI…
Huntington's Disease Signaling	6.58	AKT1,ARFIP2,ATF2,ATF4,ATP5F1B,ATP5MC1,BAX,BDNF,CAPN1,CAPN10,CAPN3,CASP4,CASP6,CASP8,CDK5,CLTC,CREB1,CREB3,CREBBP,CTSD,DCTN1,DNAJB1,DNAJC5,DNM1L,GNB1L,GNG3,GRB2,GRIN2B,HDAC2,HDAC4,HDAC8,HDAC9,HRAS,HSPA1A/HSPA1B,HSPA1L,HSPA4,HSPA9,ITPR1,MAPK3,NAPB,NAPG,NCOR1,NCOR2,PDPK1,PIK3C2A,PIK3C2B,PIK3C3,PIK3R1,PIK3R2,PIK3R5,PLCB3,POLR2B,POLR2C,POLR2F,POLR2H,POLR2J2/POLR2J3,POLR2K,PRKCD,PRKCE,PRKCI,PRKCZ,PSME1…
Hereditary Breast Cancer Signaling	6.54	AKT1,ATM,BLM,BRCA1,CCNB1,CDC25C,CDK1,CDK4,CDKN1A,CHEK2,CREBBP,DDB2,FAAP100,FANCC,FANCD2,FANCG,GADD45A,GADD45B,GADD45G,H2AX,HDAC2,HDAC4,HDAC8,HDAC9,HRAS,MLH1,MRE11,NBN,NRAS,PIK3C2A,PIK3C2B,PIK3C3,PIK3R1,PIK3R2,PIK3R5,POLR2B,POLR2C,POLR2F,POLR2H,POLR2J2/POLR2J3,POLR2K,RAP1B,RFC2,RFC3,RPS27A,RRAS2,SMARCA4,SMARCC2,SMARCD2,SMARCD3,TUBG1,XPC
3-phosphoinositide Biosynthesis	6.36	ACP1,ACP6,ATP1A1,CDC25A,CDC25C,DOT1L,DUSP1,DUSP10,DUSP11,DUSP12,DUSP16,DUSP23,DUSP27,DUSP28,DUSP5,FIG4,HACD2,MDP1,MINPP1,MTMR4,MTMR6,MTMR9,NOCT,NT5C,NUDT1,NUDT15,NUDT16,NUDT5,PDXP,PI4K2B,PI4KB,PIK3C2A,PIK3C2B,PIK3C3,PIK3R1,PIK3R2,PIK3R5,PIKFYVE,PLPP6,PPFIA1,PPIP5K1,PPP1CC,PPP1R14B,PPP1R16B,PPP1R1C,PPP1R7,PPP1R8,PPP2R5A,PPP2R5D,PPP3CA,PPP4R1,PPP5C,PPTC7,PTPA,PTPN1,PTPN2,PTPN22,RASA1,SACM1L,SYNJ1,W…
NER Pathway	6.34	CCNH,CDK7,CHAF1A,CHAF1B,COPS5,COPS7A,COPS7B,CUL4A,DDB1,DDB2,ERCC3,ERCC6,GPS1,GTF2H2,GTF2H3,H3-3A/H3-3B,H4C14,H4C3,LIG1,LIG4,MNAT1,NEDD8,PCNA,POLA1,POLA2,POLD1,POLE2,POLR2B,POLR2C,POLR2F,POLR2H,POLR2J2/POLR2J3,POLR2K,RFC2,RFC3,RPA2,TCEA1,TOP2B,UBE2I,UBE2N,USP7,XPC
D-myo-inositol-5-phosphate Metabolism	6.32	ACP1,ACP6,ATP1A1,CDC25A,CDC25C,DOT1L,DUSP1,DUSP10,DUSP11,DUSP12,DUSP16,DUSP23,DUSP27,DUSP28,DUSP5,FIG4,HACD2,MDP1,MINPP1,MTMR4,MTMR6,MTMR9,NOCT,NT5C,NUDT1,NUDT15,NUDT16,NUDT5,PDXP,PIKFYVE,PIP4K2A,PLCB3,PLCD1,PLCG2,PLPP6,PPFIA1,PPIP5K1,PPP1CC,PPP1R14B,PPP1R16B,PPP1R1C,PPP1R7,PPP1R8,PPP2R5A,PPP2R5D,PPP3CA,PPP4R1,PPP5C,PPTC7,PTPA,PTPN1,PTPN2,PTPN22,RASA1,SACM1L,SYNJ1,WBP11
D-myo-inositol (1,4,5,6)-Tetrakisphosphate Biosynthesis	6.29	ACP1,ACP6,ATP1A1,CDC25A,CDC25C,DOT1L,DUSP1,DUSP10,DUSP11,DUSP12,DUSP16,DUSP23,DUSP27,DUSP28,DUSP5,FIG4,HACD2,MDP1,MINPP1,MTMR4,MTMR6,MTMR9,NOCT,NT5C,NUDT1,NUDT15,NUDT16,NUDT5,PDXP,PIKFYVE,PLPP6,PPFIA1,PPIP5K1,PPP1CC,PPP1R14B,PPP1R16B,PPP1R1C,PPP1R7,PPP1R8,PPP2R5A,PPP2R5D,PPP3CA,PPP4R1,PPP5C,PPTC7,PTPA,PTPN1,PTPN2,PTPN22,RASA1,SACM1L,SYNJ1,WBP11
D-myo-inositol (3,4,5,6)-tetrakisphosphate Biosynthesis	6.29	ACP1,ACP6,ATP1A1,CDC25A,CDC25C,DOT1L,DUSP1,DUSP10,DUSP11,DUSP12,DUSP16,DUSP23,DUSP27,DUSP28,DUSP5,FIG4,HACD2,MDP1,MINPP1,MTMR4,MTMR6,MTMR9,NOCT,NT5C,NUDT1,NUDT15,NUDT16,NUDT5,PDXP,PIKFYVE,PLPP6,PPFIA1,PPIP5K1,PPP1CC,PPP1R14B,PPP1R16B,PPP1R1C,PPP1R7,PPP1R8,PPP2R5A,PPP2R5D,PPP3CA,PPP4R1,PPP5C,PPTC7,PTPA,PTPN1,PTPN2,PTPN22,RASA1,SACM1L,SYNJ1,WBP11
Inhibition of ARE-Mediated mRNA Degradation Pathway	6.28	AGO3,AKT1,CD70,CNOT11,CNOT2,CNOT4,CNOT7,DCP1A,DIS3,DIS3L,EXOSC1,EXOSC10,EXOSC2,EXOSC3,EXOSC4,EXOSC9,LTA,LTB,MAP3K7,MAPK15,MAPK3,MAPK6,NGFR,PAPOLA,PAPOLG,PARN,PPP2CB,PPP2R1B,PPP2R2A,PPP2R2B,PPP2R2C,PPP2R3B,PPP2R5A,PPP2R5C,PPP2R5D,PSME1,PSME3,PSME4,PTPA,TNF,TNFSF14,TNFSF9,YWHAE,YWHAG,ZFP36,ZFP36L1
Reelin Signaling in Neurons	6.21	ACTR3,AKT1,APOE,ARHGEF1,ARHGEF12,ARHGEF16,ARHGEF2,ARHGEF6,ARHGEF9,ARPC2,ARPC5,CAMK2B,CAMK2D,CAMK2G,CDC42,CDK5,CFL1,CRK,CRKL,FGR,GRIN2B,GRINA,ITGA4,ITGAL,ITGB1,ITGB2,LCK,LIMK1,LYN,MAP2K3,MAP4K1,MAPK3,MAPK8IP3,NDEL1,NECTIN3,PAFAH1B3,PIK3C2A,PIK3C2B,PIK3C3,PIK3R1,PIK3R2,PIK3R5,RAC1,RAP1B,RELN,SRC,VLDLR,WASL
NGF Signaling	6.08	AKT1,ATF2,ATF4,BAX,CDC42,CREB1,CREB3,CREBBP,CRK,GAB1,GRB2,HRAS,MAP3K12,MAP3K4,MAP3K6,MAP3K7,MAP3K8,MAPK3,NGFR,NRAS,PDPK1,PIK3C2A,PIK3C2B,PIK3C3,PIK3R1,PIK3R2,PIK3R5,PLCG2,PRKCD,PRKCZ,RAC1,RAF1,RAP1B,RELA,ROCK1,RPS6KA3,RPS6KA4,RPS6KB2,RPS6KC1,RRAS2,SHC1,SMPD1,SOS1,SOS2,TRAF6
Prostate Cancer Signaling	6.04	ABL1,AKT1,AR,ATF2,ATF4,BCL2,CCNE1,CCNE2,CDKN1A,CREB1,CREB3,CREBBP,CTNNB1,GRB2,GSTP1,HRAS,HSP90AB1,KLK3,MAPK3,MDM2,NFKBIB,NFKBID,NRAS,PDPK1,PIK3C2A,PIK3C2B,PIK3C3,PIK3R1,PIK3R2,PIK3R5,RAF1,RAP1B,RELA,RRAS2,SIN3A,SOS1,SOS2,SUV39H1
3-phosphoinositide Degradation	6.04	ACP1,ACP6,ATP1A1,CDC25A,CDC25C,DOT1L,DUSP1,DUSP10,DUSP11,DUSP12,DUSP16,DUSP23,DUSP27,DUSP28,DUSP5,FIG4,HACD2,INPP4A,MDP1,MINPP1,MTMR14,MTMR3,MTMR4,MTMR6,MTMR9,NOCT,NT5C,NUDT1,NUDT15,NUDT16,NUDT5,PDXP,PIKFYVE,PLPP6,PPFIA1,PPIP5K1,PPP1CC,PPP1R14B,PPP1R16B,PPP1R1C,PPP1R7,PPP1R8,PPP2R5A,PPP2R5D,PPP3CA,PPP4R1,PPP5C,PPTC7,PTPA,PTPN1,PTPN2,PTPN22,RASA1,SACM1L,SYNJ1,WBP11
PI3K Signaling in B Lymphocytes	6.02	ABL1,AKT1,ATF1,ATF2,ATF3,ATF4,BTK,C3,CALM1 (includes others),CALML5,CAMK2B,CAMK2D,CAMK2G,CD40,CD79A,CD79B,CR2,CREB1,FOS,HRAS,ITPR1,ITPR2,ITPR3,LYN,MAPK3,NFAT5,NFATC1,NFATC3,NFKBIB,NFKBID,NRAS,PDIA3,PDPK1,PIK3AP1,PIK3R1,PIK3R2,PLCB3,PLCD1,PLCG2,PLEKHA3,PPP3CA,PPP3CB,PPP3CC,PRKCI,PRKCZ,RAC1,RAF1,RAP1B,RELA,RRAS2,SYK
Cell Cycle: G2/M DNA Damage Checkpoint Regulation	5.89	ABL1,ATM,BORA,BRCA1,BTRC,CCNB1,CDC25C,CDK1,CDK7,CDKN1A,CDKN2A,CHEK2,CKS2,FBXL5,GADD45A,HIPK2,MDM2,MDM4,PRKDC,SKP2,TOP2B,TRIP12,YWHAE,YWHAG
Synaptogenesis Signaling Pathway	5.81	ACTR3,ADCY2,ADCY3,ADCY7,AKT1,AP1B1,AP2A1,AP2B1,AP2S1,APOE,ARHGEF7,ARPC2,ARPC5,ATF2,ATF4,BDNF,BRAF,CALM1 (includes others),CALML5,CAMK2B,CAMK2D,CAMK2G,CDC42,CDK5,CFL1,CLASP2,CREB1,CREB3,CREBBP,CRK,CRKL,CTNNB1,CTNND1,DNAJC5,EFNA1,EFNA4,EFNB2,EPHA5,EPHA6,EPHB2,FGR,GRB2,GRIA1,GRIN2B,GRINA,GRM2,HRAS,ITPR1,KALRN,LCK,LIMK1,LYN,MAPK3,NAPB,NAPG,NECTIN1,NECTIN3,NLGN3,NRAS,NRXN1,PIK3C2A,PIK3C2B,PIK3C3,PIK3R…
Cell Cycle Control of Chromosomal Replication	5.76	CDC45,CDC7,CDK1,CDK13,CDK17,CDK19,CDK4,CDK5,CDK7,CDK8,CDK9,CDT1,CHEK2,DBF4,LIG1,MCM3,MCM4,MCM5,MCM6,MCM7,PCNA,POLA1,POLA2,POLD1,RPA2,TOP2B
Mitotic Roles of Polo-Like Kinase	5.74	ANAPC1,ANAPC11,CAPN1,CCNB1,CDC20,CDC25A,CDC25C,CDC7,CDK1,CHEK2,FBXO5,HSP90AB1,KIF11,PLK2,PLK3,PLK4,PPP2CB,PPP2R1B,PPP2R2A,PPP2R2B,PPP2R2C,PPP2R3B,PPP2R5A,PPP2R5C,PPP2R5D,PTPA,SLK,SMC3,STAG2
B Cell Receptor Signaling	5.64	ABL1,AKT1,ATF2,ATF4,BCL2A1,BTK,CALM1 (includes others),CALML5,CAMK2B,CAMK2D,CAMK2G,CD79A,CD79B,CDC42,CFL1,CFL2,CREB1,CREB3,CREBBP,ETS1,GAB1,GAB2,GRB2,HRAS,LYN,MAP2K3,MAP3K12,MAP3K4,MAP3K6,MAP3K7,MAP3K8,MAPK3,NFAT5,NFATC1,NFATC3,NFKBIB,NFKBID,NRAS,PDPK1,PIK3AP1,PIK3C2A,PIK3C2B,PIK3C3,PIK3R1,PIK3R2,PIK3R5,PLCG2,PPP3CA,PPP3CB,PPP3CC,RAC1,RAF1,RAP1B,RASSF5,RELA,RPS6KB2,RRAS2,SHC1,SOS1,SOS2,SYK,SYNJ1
Superpathway of Inositol Phosphate Compounds	5.59	ACP1,ACP6,ATP1A1,CDC25A,CDC25C,DOT1L,DUSP1,DUSP10,DUSP11,DUSP12,DUSP16,DUSP23,DUSP27,DUSP28,DUSP5,FIG4,HACD2,INPP5A,IP6K1,IP6K2,IPPK,ITPKA,MDP1,MINPP1,MTMR4,MTMR6,MTMR9,NOCT,NT5C,NUDT1,NUDT15,NUDT16,NUDT5,PDXP,PI4K2B,PI4KB,PIK3C2A,PIK3C2B,PIK3C3,PIK3R1,PIK3R2,PIK3R5,PIKFYVE,PIP4K2A,PLCB3,PLCD1,PLCG2,PLPP6,PPFIA1,PPIP5K1,PPP1CC,PPP1R14B,PPP1R16B,PPP1R1C,PPP1R7,PPP1R8,PPP2R5A,PPP2R5D,PPP3CA,PPP4R1,…
GADD45 Signaling	5.57	ATM,BRCA1,CCNB1,CCNE1,CCNE2,CDK1,CDK4,CDKN1A,GADD45A,GADD45B,GADD45G,MAP3K4,PCNA
GM-CSF Signaling	5.48	AKT1,BCL2A1,CAMK2B,CAMK2D,CAMK2G,ETS1,GRB2,HRAS,LYN,MAPK3,NRAS,PIK3C2A,PIK3C2B,PIK3C3,PIK3R1,PIK3R2,PIK3R5,PIM1,PPP3CA,PPP3CB,PPP3CC,RACK1,RAF1,RAP1B,RRAS2,SHC1,SOS1,SOS2,STAT1,STAT3
SAPK/JNK Signaling	5.48	ATF2,CDC42,CRK,CRKL,DUSP10,DUSP4,FADD,GAB1,GADD45A,GNA12,GNA13,GRB2,HRAS,LCK,MAP3K12,MAP3K4,MAP3K7,MAP4K1,MAP4K5,MAPK8IP3,MINK1,NFATC1,NFATC3,NRAS,PIK3C2A,PIK3C2B,PIK3C3,PIK3R1,PIK3R2,PIK3R5,RAC1,RAP1B,RIPK1,RRAS2,SH2D2A,SHC1,SOS1,SOS2,TAB1
Melanocyte Development and Pigmentation Signaling	5.44	ADCY2,ADCY3,ADCY7,ATF2,ATF4,BCL2,CREB1,CREB3,CREBBP,CRK,GNAS,GRB2,HRAS,MAPK3,MC1R,MITF,NRAS,PAX3,PIK3C2A,PIK3C2B,PIK3C3,PIK3R1,PIK3R2,PIK3R5,PLCG2,RAF1,RAP1B,RPS6KA3,RPS6KA4,RPS6KB2,RPS6KC1,RRAS2,SH2B2,SHC1,SOS1,SOS2,SRC
EGF Signaling	5.24	AKT1,CSNK2A1,CSNK2A2,CSNK2B,FOS,GRB2,HRAS,ITPR1,ITPR2,ITPR3,JAK1,MAPK3,PIK3C2A,PIK3C2B,PIK3C3,PIK3R1,PIK3R2,PIK3R5,RAF1,RASA1,SHC1,SOS1,SOS2,SRC,STAT1,STAT3
PI3K/AKT Signaling	5.13	AKT1,BCL2,CDC37,CDKN1A,CTNNB1,CXCR1,EIF4E,GAB1,GAB2,GRB2,GYS1,HRAS,HSP90AB1,IL10RB,IL12RB1,IL17RC,IL17RE,IL21R,IL22RA2,IL2RA,IL6ST,ILK,ITGA4,ITGB1,JAK1,LIMS1,MAP3K8,MAPK3,MDM2,NFKBIB,NFKBID,NRAS,PDPK1,PIK3R1,PIK3R2,PPP2CB,PPP2R1B,PPP2R2A,PPP2R2B,PPP2R2C,PPP2R3B,PPP2R5A,PPP2R5C,PPP2R5D,PTPA,RAF1,RAP1B,RELA,RHEB,RPS6KB2,RRAS2,SHC1,SOS1,SOS2,SYNJ1,TSC1,YWHAE,YWHAG
Cell Cycle: G1/S Checkpoint Regulation	5.05	ABL1,ATM,BMI1,BTRC,CCNE1,CCNE2,CDC25A,CDK4,CDKN1A,CDKN2A,E2F2,E2F3,E2F5,FBXL5,GNL3,HDAC2,HDAC4,HDAC8,HDAC9,MAX,MDM2,RBL2,RPL11,RPL5,SIN3A,SKP2,SMAD4,SUV39H1
Chronic Myeloid Leukemia Signaling	5.05	ABL1,AKT1,CDK4,CDKN1A,CDKN2A,CRK,CRKL,CTBP1,E2F2,E2F3,E2F5,GAB2,GRB2,HDAC2,HDAC4,HDAC8,HDAC9,HRAS,MAPK3,MDM2,NRAS,PIK3C2A,PIK3C2B,PIK3C3,PIK3R1,PIK3R2,PIK3R5,RAF1,RAP1B,RBL2,RELA,RRAS2,SIN3A,SMAD4,SOS1,SOS2,STAT5A,SUV39H1
Ceramide Signaling	5.04	AKT1,BCL2,CTSD,DIABLO,FOS,HRAS,KSR1,MAPK3,NGFR,NRAS,PIK3C2A,PIK3C2B,PIK3C3,PIK3R1,PIK3R2,PIK3R5,PPP2CB,PPP2R1B,PPP2R2A,PPP2R2B,PPP2R2C,PPP2R3B,PPP2R5A,PPP2R5C,PPP2R5D,PRKCZ,PTPA,RAF1,RAP1B,RELA,RRAS2,S1PR1,SMPD1,SPHK2,TNF
PDGF Signaling	5.04	ABL1,ABL2,ACP1,CAV3,CRK,CRKL,CSNK2A1,CSNK2A2,CSNK2B,EIF2AK2,FOS,GRB2,HRAS,JAK1,MAPK3,NRAS,PIK3C2A,PIK3C2B,PIK3C3,PIK3R1,PIK3R2,PIK3R5,PLCG2,RAF1,RAP1B,RASA1,RRAS2,SHC1,SOS1,SOS2,SPHK2,SRC,STAT1,STAT3,SYNJ1
Telomerase Signaling	5.02	ABL1,AKT1,CDKN1A,ELF2,ETS1,GRB2,HDAC2,HDAC4,HDAC8,HDAC9,HRAS,HSP90AB1,IL2RA,MAPK3,NRAS,PDPK1,PIK3C2A,PIK3C2B,PIK3C3,PIK3R1,PIK3R2,PIK3R5,POT1,PPP2CB,PPP2R1B,PPP2R2A,PPP2R2B,PPP2R2C,PPP2R3B,PPP2R5A,PPP2R5C,PPP2R5D,PTPA,RAF1,RAP1B,RRAS2,SHC1,SOS1,SOS2
Endocannabinoid Cancer Inhibition Pathway	4.96	ADCY2,ADCY3,ADCY7,AKT1,ATF2,ATF3,ATF4,CASP4,CASP6,CASP8,CCNE1,CCNE2,CDKN1A,CREB1,CREB3,CREBBP,CTNNB1,DDIT3,EIF2A,GNA13,GNAI1,GNAI2,GNAO1,GNB1L,GPR55,HIF1A,MAP2K3,MAPK3,PGF,PIK3C2A,PIK3C2B,PIK3C3,PIK3R1,PIK3R2,PIK3R5,PRKAA1,PRKAB1,PRKAB2,RAF1,ROCK1,RPTOR,SMPD1,SPTLC1,SRC,TCF7,TRIB3,TRPV1,TWIST1,VEGFA,VEGFB
IL-3 Signaling	4.85	AKT1,CRKL,FOS,GAB2,GRB2,HRAS,JAK1,MAPK3,NRAS,PIK3C2A,PIK3C2B,PIK3C3,PIK3R1,PIK3R2,PIK3R5,PPP3CA,PPP3CB,PPP3CC,PRKCD,PRKCE,PRKCI,PRKCZ,RAC1,RAF1,RAP1B,RRAS2,SHC1,SOS1,STAT1,STAT3,STAT5A
Aldosterone Signaling in Epithelial Cells	4.79	CRYAB,DNAJB1,DNAJB12,DNAJB14,DNAJB6,DNAJB9,DNAJC10,DNAJC15,DNAJC17,DNAJC18,DNAJC19,DNAJC21,DNAJC25,DNAJC27,DNAJC3,DNAJC5,DUSP1,HSP90AB1,HSPA1A/HSPA1B,HSPA1L,HSPA4,HSPA4L,HSPA9,HSPB6,HSPE1,HSPH1,ITPR1,ITPR2,ITPR3,MAPK3,NEDD4,PDIA3,PDPK1,PIK3C2A,PIK3C2B,PIK3C3,PIK3R1,PIK3R2,PIK3R5,PIKFYVE,PLCB3,PLCD1,PLCG2,PRKCD,PRKCE,PRKCI,PRKCZ,RAF1,SACS,SASS6,SCNN1G,SLC12A2,SOS1,SOS2
Glucocorticoid Receptor Signaling	4.75	AKT1,AR,BCL2,BGLAP,CCNH,CDK7,CDKN1A,CREB1,CREBBP,CREBZF,DUSP1,ERCC3,FOS,GRB2,GTF2F1,GTF2H2,GTF2H3,HRAS,HSP90AB1,HSPA1A/HSPA1B,HSPA1L,HSPA4,HSPA9,ICAM1,JAK1,KRT10,KRT32,MAP3K7,MAPK3,MED1,MMP1,MNAT1,NCOA2,NCOA3,NCOR1,NCOR2,NFAT5,NFATC1,NFATC3,NFKBIB,NFKBID,NR3C1,NRAS,NRIP1,PCK2,PIK3C2A,PIK3C2B,PIK3C3,PIK3R1,PIK3R2,PIK3R5,PLAU,POLR2B,POLR2C,POLR2F,POLR2H,POLR2J2/POLR2J3,POLR2K,PPP3CA,PPP3CB,PPP3CC,P…
Role of BRCA1 in DNA Damage Response	4.72	ATF1,ATM,ATRIP,BABAM1,BABAM2,BLM,BRCA1,BRCC3,CDKN1A,CHEK2,E2F2,E2F3,E2F5,FAAP100,FANCC,FANCD2,FANCG,GADD45A,MLH1,MRE11,NBN,RBBP8,RBL2,RFC2,RFC3,SMARCA4,SMARCC2,SMARCD2,SMARCD3,STAT1,UIMC1
ERK5 Signaling	4.7	AKT1,ATF2,ATF4,CREB1,CREB3,CREBBP,CTF1,ELK4,FOS,GAB1,GNA12,GNA13,HRAS,IL6ST,MAP3K8,MEF2A,MEF2B,NRAS,RAP1B,RPS6KA3,RPS6KA4,RPS6KB2,RPS6KC1,RRAS2,SH2D2A,SRC,WNK1,YWHAE,YWHAG
Natural Killer Cell Signaling	4.69	AKT1,B2M,CD48,CDC42,CFL1,CFL2,GRB2,HLA-F,HRAS,HSPA1A/HSPA1B,HSPA1L,HSPA4,HSPA9,IL12RB1,IL15,ITGAL,ITGB1,KIR2DL5B,LAIR1,LCK,LCP2,LIMK1,LIMK2,MAP2K3,MAP3K12,MAP3K4,MAP3K6,MAP3K7,MAP3K8,MAPK3,MICA,MICB,MYD88,NCK1,NCR3,NFAT5,NFATC1,NFATC3,NRAS,PAK2,PIK3C2A,PIK3C2B,PIK3C3,PIK3R1,PIK3R2,PIK3R5,PLCG2,PVR,RAC1,RAF1,RAP1B,RASSF5,RELA,ROCK1,RRAS2,SOS1,SOS2,SYK,TRAF6,WAS,WASL,WIPF1
HGF Signaling	4.68	AKT1,ATF2,CDC42,CDKN1A,CDKN2A,CRKL,ELF2,ETS1,FOS,GAB1,GRB2,HGF,HRAS,ITGA4,ITGB1,MAP3K12,MAP3K4,MAP3K6,MAP3K7,MAP3K8,MAPK3,NRAS,PIK3C2A,PIK3C2B,PIK3C3,PIK3R1,PIK3R2,PIK3R5,PLCG2,PRKCD,PRKCE,PRKCI,PRKCZ,RAC1,RAF1,RAP1B,RRAS2,SOS1,SOS2,STAT3
Unfolded protein response	4.63	AMFR,ATF4,BCL2,CANX,CD82,DDIT3,DNAJB9,DNAJC3,EDEM1,EIF2A,ERN1,HSPA1A/HSPA1B,HSPA1L,HSPA4,HSPA9,HSPH1,MBTPS1,MBTPS2,OS9,PPP1R15A,SCAP,SREBF1,SREBF2,SYVN1
IL-2 Signaling	4.62	AKT1,CSNK2A1,CSNK2A2,CSNK2B,FOS,GRB2,HRAS,IL2RA,JAK1,LCK,MAPK3,NRAS,PIK3C2A,PIK3C2B,PIK3C3,PIK3R1,PIK3R2,PIK3R5,RAF1,RAP1B,RRAS2,SHC1,SOS1,SOS2,STAT5A,SYK
Neurotrophin/TRK Signaling	4.6	AKT1,ATF2,ATF4,BDNF,CDC42,CREB1,CREB3,CREBBP,FOS,GAB1,GRB2,HRAS,KLK3,MAP2K3,MAPK3,NGFR,NRAS,PDPK1,PIK3C2A,PIK3C2B,PIK3C3,PIK3R1,PIK3R2,PIK3R5,RAF1,RAP1B,RRAS2,SHC1,SOS1,SOS2,SPRY1
fMLP Signaling in Neutrophils	4.55	ACTR3,ARPC2,ARPC5,CALM1 (includes others),CALML5,CDC42,GNAI1,GNAI2,GNAS,GNB1L,GNG3,HRAS,ITPR1,ITPR2,ITPR3,MAPK3,NFAT5,NFATC1,NFATC3,NFKBIB,NFKBID,NRAS,PIK3C2A,PIK3C2B,PIK3C3,PIK3R1,PIK3R2,PIK3R5,PLCB3,PPP3CA,PPP3CB,PPP3CC,PRKCD,PRKCE,PRKCI,PRKCZ,RAC1,RAF1,RAP1B,RELA,RRAS2,WAS
Sirtuin Signaling Pathway	4.54	ACSS2,AKT1,ARNTL,ATG10,ATG101,ATG16L1,ATG2A,ATG2B,ATG4A,ATG7,ATG9A,ATP5F1B,ATP5MC1,BAX,CPT1A,CRTC2,DOT1L,G6PD,GABPB2,GADD45A,GADD45B,GADD45G,GTF3C2,H1-1,H3-3A/H3-3B,HIF1A,HSF1,LDHA,MAP1LC3B,MAPK15,MAPK3,MAPK6,MLYCD,NAMPT,NBN,NDUFA7,NDUFA8,NDUFAF1,NDUFB10,NDUFS1,NDUFS3,NDUFS8,NEDD4,NR1H2,NR1H3,NR1H4,PAM16,PARP1,PCK2,PDHA1,POLR1C,POLR1D,POLR2F,POLR3D,PPARA,PRKAA1,PRKDC,RBBP8,RELA,RPTOR,SDHC,SIRT2,S…
Clathrin-mediated Endocytosis Signaling	4.52	ACTR3,AP1B1,AP1M1,AP1S2,AP2A1,AP2B1,AP2S1,AP3M1,APOE,ARF6,ARPC2,ARPC5,ARRB1,CD2AP,CDC42,CLTC,CLU,CSNK2A1,CSNK2A2,CSNK2B,DNM1L,EPHB2,F2R,FGF1,FGF19,FGF20,FGF9,GRB2,ITGB1,ITGB2,MDM2,NUMB,PGF,PICALM,PIK3C2A,PIK3C2B,PIK3C3,PIK3R1,PIK3R2,PIK3R5,PON1,PPP3CA,PPP3CB,PPP3CC,RAB4B,RAB5B,RAB5C,RAB7A,RAC1,RPS27A,SERPINA1,SH3GLB2,SH3KBP1,SRC,STAM,SYNJ1,USP9X,VEGFA,VEGFB,WASL
Cell Cycle Regulation by BTG Family Proteins	4.51	CCNE1,CCNE2,CDK4,CNOT7,E2F2,E2F3,E2F5,NOCT,PPP2CB,PPP2R1B,PPP2R2A,PPP2R2B,PPP2R2C,PPP2R3B,PPP2R5A,PPP2R5C,PPP2R5D,PTPA
Renal Cell Carcinoma Signaling	4.47	AKT1,CDC42,CREBBP,CRK,CUL2,EGLN3,ETS1,FH,FOS,GAB1,GRB2,HGF,HIF1A,HRAS,MAPK3,NRAS,PAK2,PIK3C2A,PIK3C2B,PIK3C3,PIK3R1,PIK3R2,PIK3R5,RAC1,RAF1,RAP1B,RPS27A,RRAS2,SOS1,SOS2,VEGFA
Erythropoietin Signaling	4.39	AKT1,EPOR,FOS,GRB2,HRAS,MAPK3,NFKBIB,NFKBID,NRAS,PDPK1,PIK3C2A,PIK3C2B,PIK3C3,PIK3R1,PIK3R2,PIK3R5,PLCG2,PRKCD,PRKCE,PRKCI,PRKCZ,RAF1,RAP1B,RELA,RRAS2,SHC1,SOS1,SOS2,SRC,STAT5A
Glioma Signaling	4.29	ABL1,AKT1,CALM1 (includes others),CALML5,CAMK2B,CAMK2D,CAMK2G,CDK4,CDKN1A,CDKN2A,E2F2,E2F3,E2F5,GRB2,HRAS,IDH3B,IDH3G,MAPK3,MDM2,NRAS,PIK3C2A,PIK3C2B,PIK3C3,PIK3R1,PIK3R2,PIK3R5,PLCG2,PRKCD,PRKCE,PRKCI,PRKCZ,RAF1,RAP1B,RBL2,RRAS2,SHC1,SIN3A,SOS1,SOS2,SUV39H1
ErbB4 Signaling	4.28	AKT1,APH1A,GRB2,HRAS,MAPK3,NRAS,PDPK1,PIK3C2A,PIK3C2B,PIK3C3,PIK3R1,PIK3R2,PIK3R5,PLCG2,PRKCD,PRKCE,PRKCI,PRKCZ,PSEN1,PSEN2,PSENEN,RAF1,RAP1B,RRAS2,SHC1,SOS1,SOS2
FLT3 Signaling in Hematopoietic Progenitor Cells	4.27	AKT1,ATF2,ATF4,CREB1,CREB3,CREBBP,EIF4E,GAB2,GRB2,HRAS,MAPK3,NRAS,PDPK1,PIK3C2A,PIK3C2B,PIK3C3,PIK3R1,PIK3R2,PIK3R5,RAF1,RAP1B,RPS6KA3,RPS6KA4,RRAS2,SHC1,SOS1,SOS2,STAT1,STAT3,STAT5A
Role of NFAT in Regulation of the Immune Response	4.27	AKT1,ATF2,BTK,CALM1 (includes others),CALML5,CD79A,CD79B,CD80,CSNK1G1,CSNK1G3,FOS,GNA12,GNA13,GNAI1,GNAI2,GNAO1,GNAS,GNB1L,GNG3,GRB2,HLA-DMA,HLA-DMB,HRAS,ITPR1,ITPR2,ITPR3,LCK,LCP2,LYN,MAPK3,MEF2A,MEF2B,NFAT5,NFATC1,NFATC3,NFKBIB,NFKBID,NRAS,ORAI1,PIK3C2A,PIK3C2B,PIK3C3,PIK3R1,PIK3R2,PIK3R5,PLCB3,PLCG2,PPP3CA,PPP3CB,PPP3CC,RAF1,RAP1B,RELA,RRAS2,SOS1,SOS2,SYK
Prolactin Signaling	4.24	CREBBP,FOS,GRB2,HRAS,MAPK3,NMI,NR3C1,NRAS,PDPK1,PIK3C2A,PIK3C2B,PIK3C3,PIK3R1,PIK3R2,PIK3R5,PLCG2,PRKCD,PRKCE,PRKCI,PRKCZ,RAF1,RAP1B,RRAS2,SHC1,SOCS6,SOS1,SOS2,STAT1,STAT3,STAT5A,TCF7
AMPK Signaling	4.21	ADRA1D,ADRA2B,AK2,AK3,AKT1,ATF2,ATF4,CCNA2,CDKN1A,CFTR,CHRNA5,CHRNA9,CHRNB3,CPT1A,CPT2,CREB1,CREB3,CREBBP,CRTC2,ELAVL1,FASN,GNAS,GNB1L,GYS1,HMGCR,INSR,MAP2K3,MAP3K7,MLYCD,ORAI1,PCK2,PFKFB2,PFKP,PIK3C2A,PIK3C2B,PIK3C3,PIK3R1,PIK3R2,PIK3R5,PPM1A,PPM1B,PPM1F,PPM1G,PPP2CB,PPP2R1B,PPP2R2A,PPP2R2B,PPP2R2C,PPP2R3B,PPP2R5A,PPP2R5C,PPP2R5D,PRKAA1,PRKAB1,PRKAB2,PTPA,RAB1A,RAB2A,RAB7A,RPTOR,SMARCA4,SMARCC2,…
Adipogenesis pathway	4.18	AGPAT2,AKT1,ARNTL,ATG7,BMP4,BMPR2,BSCL2,CCNH,CDK5,CDK7,CTBP1,CTNNB1,DDIT3,EGR2,ERCC3,FABP4,FGF1,FZD1,GTF2H2,GTF2H3,HAT1,HDAC2,HDAC4,HDAC8,HDAC9,HIF1A,KAT6A,KAT7,KDM1A,MNAT1,NOCT,PAXIP1,PER2,PPIP5K1,RBBP4,RBBP7,RPS6KC1,SAP30L,SIN3A,SIRT2,SOX9,SREBF1,TCF7,TNF
Integrin Signaling	4.15	ABL1,ACTN4,ACTR3,AKT1,ARF1,ARF5,ARF6,ARHGEF7,ARPC2,ARPC5,BRAF,CAPN1,CAPN10,CAPN3,CDC42,CRK,CRKL,GRB2,HRAS,ILK,ITGA4,ITGAL,ITGAV,ITGB1,ITGB2,LIMS1,MAPK3,NCK1,NCK2,NEDD9,NRAS,PAK2,PARVB,PFN1,PFN3,PFN4,PIK3C2A,PIK3C2B,PIK3C3,PIK3R1,PIK3R2,PIK3R5,PIKFYVE,PLCG2,RAC1,RAF1,RAP1B,RHOT1,RHOV,RND2,ROCK1,RRAS2,SHC1,SOS1,SOS2,SRC,TLN1,TNK2,TSPAN2,TSPAN3,WAS,WASL,WIPF1
CTLA4 Signaling in Cytotoxic T Lymphocytes	4.1	AKT1,AP1B1,AP1M1,AP1S2,AP2A1,AP2B1,AP2S1,B2M,CD80,CLTC,GRB2,HLA-F,LCK,LCP2,PIK3C2A,PIK3C2B,PIK3C3,PIK3R1,PIK3R2,PIK3R5,PPP2CB,PPP2R1B,PPP2R2A,PPP2R2B,PPP2R2C,PPP2R3B,PPP2R5A,PPP2R5C,PPP2R5D,PTPA,PTPN22,SYK
Protein Kinase A Signaling	4.03	ACP1,ADCY2,ADCY3,ADCY7,ADD1,ADD3,AKAP1,AKAP10,AKAP11,AKAP12,AKAP13,AKAP17A,ANAPC1,ANAPC11,ATF1,ATF2,ATF4,BRAF,CALM1 (includes others),CALML5,CAMK2B,CAMK2D,CAMK2G,CDC25A,CDC25C,CNGA3,CREB1,CREB3,CREBBP,CTNNB1,DUSP1,DUSP10,DUSP11,DUSP12,DUSP16,DUSP22,DUSP26,DUSP4,DUSP5,EBI3,EYA3,FLNA,GDPD1,GLI3,GNA13,GNAI1,GNAI2,GNAS,GNB1L,GNG3,GYS1,H1-1,H3-3A/H3-3B,ITPR1,ITPR2,ITPR3,MAPK3,MTMR3,MYH10,NFAT5,NFATC1,…
Assembly of RNA Polymerase II Complex	3.97	CCNH,CDK7,DR1,ERCC3,GTF2F1,GTF2H2,GTF2H3,MNAT1,POLR2B,POLR2C,POLR2F,POLR2H,POLR2J2/POLR2J3,POLR2K,TAF10,TAF15,TAF1L,TAF2,TAF5L,TAF6,TAF9
NF-κB Signaling	3.95	AKT1,AZI2,BMP4,BMPR2,BRAF,BTRC,CARD11,CASP8,CD40,CREBBP,CSNK2A1,CSNK2A2,CSNK2B,EIF2AK2,FADD,HDAC2,HRAS,IL37,INSR,LCK,LTA,MAP3K7,MAP3K8,MYD88,NFKBIB,NFKBID,NGFR,NRAS,PELI1,PIK3C2A,PIK3C2B,PIK3C3,PIK3R1,PIK3R2,PIK3R5,PLCG2,PRKCZ,RAF1,RAP1B,RELA,RELB,RIPK1,RRAS2,TAB1,TLR1,TLR6,TLR7,TNF,TNFRSF17,TNIP1,TRAF5,TRAF6,UBE2N,UBE2V1
NF-κB Activation by Viruses	3.93	AKT1,CR2,CXCR5,EIF2AK2,HRAS,ITGA4,ITGAL,ITGAV,ITGB1,ITGB2,LCK,MAPK3,NFKBIB,NFKBID,NRAS,PIK3C2A,PIK3C2B,PIK3C3,PIK3R1,PIK3R2,PIK3R5,PRKCD,PRKCE,PRKCI,PRKCZ,RAF1,RAP1B,RELA,RIPK1,RRAS2
Phospholipase C Signaling	3.93	ADCY2,ADCY3,ADCY7,AHNAK,ARHGEF1,ARHGEF12,ARHGEF16,ARHGEF17,ARHGEF2,ARHGEF6,ARHGEF7,ARHGEF9,ATF2,ATF4,BTK,CALM1 (includes others),CALML5,CD79A,CD79B,CDC42,CREB1,CREB3,CREBBP,GNA13,GNAS,GNB1L,GNG3,GRB2,HDAC2,HDAC4,HDAC8,HDAC9,HRAS,ITGA4,ITGB1,ITPR1,ITPR2,ITPR3,LCK,LCP2,LYN,MAPK3,MEF2A,MEF2B,NFAT5,NFATC1,NFATC3,NRAS,PLCB3,PLCD1,PLCG2,PLD3,PPP3CA,PPP3CB,PPP3CC,PRKCD,PRKCE,PRKCI,PRKCZ,RAC1,RAF1,RAP1B,…
Actin Cytoskeleton Signaling	3.91	ABI2,ACTN4,ACTR3,ARHGAP35,ARHGEF1,ARHGEF12,ARHGEF6,ARHGEF7,ARPC2,ARPC5,CDC42,CFL1,CFL2,CRK,CRKL,CYFIP2,DIAPH3,F2R,FGD3,FGF1,FGF19,FGF20,FGF9,FLNA,GNA12,GNA13,GRB2,HRAS,IQGAP1,ITGA4,ITGB1,LBP,LIMK1,LIMK2,MAPK3,MSN,MYH10,MYH13,NCKAP1,NCKAP1L,NRAS,PAK2,PFN1,PFN3,PIK3C2A,PIK3C2B,PIK3C3,PIK3R1,PIK3R2,PIK3R5,RAC1,RAF1,RAP1B,ROCK1,RRAS2,SHC1,SOS1,SOS2,SSH1,TLN1,TMSB10/TMSB4X,WAS,WASF2,WASL
Pancreatic Adenocarcinoma Signaling	3.84	ABL1,AKT1,BCL2,BIRC5,CCNE1,CDC42,CDK4,CDKN1A,CDKN2A,E2F2,E2F3,E2F5,GRB2,JAK1,MAPK3,MDM2,NOTCH1,PGF,PIK3C2A,PIK3C2B,PIK3C3,PIK3R1,PIK3R2,PIK3R5,PLD3,RAC1,RAF1,RALBP1,RELA,SIN3A,SMAD2,SMAD4,STAT1,STAT3,SUV39H1,VEGFA,VEGFB
Production of Nitric Oxide and Reactive Oxygen Species in Macrophages	3.79	AKT1,APOE,CAT,CDC42,CLU,CREBBP,FOS,IFNGR1,IFNGR2,IRF8,JAK1,MAP3K12,MAP3K4,MAP3K6,MAP3K7,MAP3K8,MAPK3,NFKBIB,NFKBID,NGFR,PIK3C2A,PIK3C2B,PIK3C3,PIK3R1,PIK3R2,PIK3R5,PLCG2,PON1,PPARA,PPP1CC,PPP1R10,PPP1R14B,PPP1R3D,PPP1R7,PPP2CB,PPP2R1B,PPP2R2A,PPP2R2B,PPP2R2C,PPP2R3B,PPP2R5A,PPP2R5C,PPP2R5D,PRKCD,PRKCE,PRKCI,PRKCZ,PTPA,RAC1,RAP1B,RELA,RHOT1,RHOV,RND2,SERPINA1,STAT1,TNF
iCOS-iCOSL Signaling in T Helper Cells	3.75	AKT1,CALM1 (includes others),CALML5,CAMK2B,CAMK2D,CAMK2G,CD40,CD80,GAB2,GRB2,HLA-DMA,HLA-DMB,ICOSLG/LOC102723996,IL2RA,ITPR1,ITPR2,ITPR3,LCK,LCP2,NFAT5,NFATC1,NFATC3,NFKBIB,NFKBID,PDPK1,PIK3C2A,PIK3C2B,PIK3C3,PIK3R1,PIK3R2,PIK3R5,PLEKHA3,PPP3CA,PPP3CB,PPP3CC,RAC1,RELA,SHC1
Sumoylation Pathway	3.67	AR,ARHGDIA,ARHGDIB,CBX4,CDC42,CREBBP,CTBP1,DNMT3A,ETS1,FAS,FOS,HDAC2,KDM1A,MDM2,NR3C1,PCNA,PIAS1,PML,RAC1,RCC1,RFC2,RFC3,RHOT1,RHOV,RND2,SENP3,SENP5,SENP7,SMAD4,SP100,SP3,SUMO1,SUMO2,SUMO3,UBE2I,ZEB1
ILK Signaling	3.65	ACTN4,AKT1,ARHGEF6,ATF2,ATF4,CDC42,CFL1,CFL2,CREB1,CREB3,CREBBP,CTNNB1,FLNA,FOS,HIF1A,ILK,ITGB1,ITGB2,LIMS1,MAPK3,MYH10,MYH13,NACA,NCK2,PARVB,PDPK1,PGF,PIK3C2A,PIK3C2B,PIK3C3,PIK3R1,PIK3R2,PIK3R5,PPP1R14B,PPP2CB,PPP2R1B,PPP2R2A,PPP2R2B,PPP2R2C,PPP2R3B,PPP2R5A,PPP2R5C,PPP2R5D,PTPA,RAC1,RELA,RHOT1,RHOV,RND2,RPS6KA4,RSU1,TESK1,TMSB10/TMSB4X,TNF,VEGFA,VEGFB
PEDF Signaling	3.63	AKT1,BCL2,BDNF,CASP8,CFLAR,FAS,HRAS,MAPK3,NFKBIB,NFKBID,NRAS,PIK3C2A,PIK3C2B,PIK3C3,PIK3R1,PIK3R2,PIK3R5,PNPLA2,RAC1,RAF1,RAP1B,RELA,ROCK1,RRAS2,SOD2,TCF12,TCF7,WASF2,ZEB1
Thrombopoietin Signaling	3.62	FOS,GAB2,GRB2,HRAS,MAPK3,NRAS,PIK3C2A,PIK3C2B,PIK3C3,PIK3R1,PIK3R2,PIK3R5,PLCG2,PRKCD,PRKCE,PRKCI,PRKCZ,RAF1,RAP1B,RRAS2,SHC1,SOS1,STAT1,STAT3,STAT5A
Systemic Lupus Erythematosus In B Cell Signaling Pathway	3.6	AKT1,BCL2,BTK,CALM1 (includes others),CALML5,CARD11,CD40,CD70,CD79A,CD79B,CTNNB1,FGR,FOS,GAB1,GRB2,HRAS,IFNGR1,IFNGR2,IL15,IL25,IL37,IL6ST,IRF7,JAK1,LCK,LTA,LTB,LYN,MAP3K7,MAPK3,MYD88,NFAT5,NFATC1,NFATC3,NRAS,PDPK1,PIK3AP1,PIK3C2A,PIK3C2B,PIK3C3,PIK3R1,PIK3R2,PIK3R5,PIM2,PLAAT4,PLCG2,PPP3CA,PPP3CB,PPP3CC,PRKCD,PRKCE,PRKCI,PRKCZ,RAC1,RAF1,RAP1B,RASGRP3,RELA,RRAS2,SHC1,SHC3,SOS1,SOS2,SRC,STAT1,STAT…
FAK Signaling	3.59	AKT1,ARHGEF6,ARHGEF7,CAPN1,CAPN10,CAPN3,CRK,GIT2,GRB2,HMMR,HRAS,ITGA4,ITGB1,MAPK3,NRAS,PAK2,PDPK1,PIK3C2A,PIK3C2B,PIK3C3,PIK3R1,PIK3R2,PIK3R5,PLCG2,RAC1,RAF1,RAP1B,RRAS2,SOS1,SOS2,SRC,TLN1,WAS
Pyridoxal 5'-phosphate Salvage Pathway	3.57	BRAF,CDK1,CDK4,CDK5,CDK7,CDK8,DYRK1A,EIF2AK2,FAM20B,GRK6,HIPK1,LIMK1,LIMK2,MAP2K3,MAP3K6,MAP3K8,MAPK3,MAPK6,NEK2,PAK2,PIM1,PKN1,PNPO,PRKAA1,PRKCD,PRKCE,PRPF4B
NRF2-mediated Oxidative Stress Response	3.57	ABCC1,ABCC4,AKT1,ATF4,BACH1,CAT,CDC34,CREBBP,DNAJB1,DNAJB12,DNAJB14,DNAJB6,DNAJB9,DNAJC10,DNAJC15,DNAJC17,DNAJC18,DNAJC19,DNAJC21,DNAJC3,DNAJC5,EPHX1,ERP29,FOS,GCLM,GSTO1,GSTP1,GSTZ1,HERPUD1,HRAS,JUNB,MAFF,MAFG,MAP2K3,MAP3K7,MAPK3,NRAS,PIK3C2A,PIK3C2B,PIK3C3,PIK3R1,PIK3R2,PIK3R5,PRKCD,PRKCE,PRKCI,PRKCZ,RAF1,RAP1B,RRAS2,SCARB1,SLC35A2,SOD1,SOD2,TXNRD1
CREB Signaling in Neurons	3.55	ADCY2,ADCY3,ADCY7,AKT1,ATF2,ATF4,CACNA1C,CALM1 (includes others),CALML5,CAMK2B,CAMK2D,CAMK2G,CREB1,CREB3,CREBBP,GNA12,GNA13,GNAI1,GNAI2,GNAO1,GNAS,GNB1L,GNG3,GRB2,GRIA1,GRIK1,GRIK2,GRIN2B,GRM2,HRAS,ITPR1,ITPR2,ITPR3,MAPK3,NRAS,PDIA3,PIK3C2A,PIK3C2B,PIK3C3,PIK3R1,PIK3R2,PIK3R5,PLCB3,PLCD1,PLCG2,POLR2B,POLR2C,POLR2F,POLR2H,POLR2J2/POLR2J3,POLR2K,PRKCD,PRKCE,PRKCI,PRKCZ,RAF1,RAP1B,RRAS2,SHC1,SOS1,SO…
Non-Small Cell Lung Cancer Signaling	3.55	ABL1,AKT1,CDK4,CDKN2A,FHIT,GRB2,HRAS,ITPR1,ITPR2,ITPR3,MAPK3,NRAS,PDPK1,PIK3C2A,PIK3C2B,PIK3C3,PIK3R1,PIK3R2,PIK3R5,RAF1,RAP1B,RASSF5,RRAS2,RXRB,SIN3A,SOS1,SOS2,SUV39H1
GDNF Family Ligand-Receptor Interactions	3.55	CDC42,CREB1,FOS,GAB1,GFRA1,GRB2,HRAS,ITPR1,ITPR2,ITPR3,MAPK3,NCK1,NRAS,PIK3C2A,PIK3C2B,PIK3C3,PIK3R1,PIK3R2,PIK3R5,PLCG2,RAC1,RAF1,RAP1B,RASA1,RRAS2,SHC1,SOS1,SOS2
Dopamine-DARPP32 Feedback in cAMP Signaling	3.52	ADCY2,ADCY3,ADCY7,ATF1,ATF2,ATF4,CACNA1C,CALM1 (includes others),CALML5,CDK5,CREB1,CREB3,CREBBP,CSNK1G1,CSNK1G3,DRD3,GNAI1,GNAI2,GNAS,GRIN2B,GRINA,ITPR1,ITPR2,ITPR3,KCNJ14,KCNJ15,PDIA3,PLCB3,PLCD1,PLCG2,PPP1CC,PPP1R10,PPP1R14B,PPP1R3D,PPP1R7,PPP2CB,PPP2R1B,PPP2R2A,PPP2R2B,PPP2R2C,PPP2R3B,PPP2R5A,PPP2R5C,PPP2R5D,PPP3CA,PPP3CB,PPP3CC,PRKCD,PRKCE,PRKCI,PRKCZ,PTPA
Apelin Endothelial Signaling Pathway	3.5	ADCY2,ADCY3,ADCY7,AKT1,CALM1 (includes others),CALML5,FOS,GNA13,GNAI1,GNAI2,GNAO1,GNAS,HDAC4,HIF1A,HRAS,ICAM1,MAPK3,MEF2A,MEF2B,NRAS,PIK3C2A,PIK3C2B,PIK3C3,PIK3R1,PIK3R2,PIK3R5,PLCB3,PRKAA1,PRKAB1,PRKAB2,PRKCD,PRKCE,PRKCI,PRKCZ,RAF1,RAP1B,RELA,RPS6KB2,RRAS2
CNTF Signaling	3.5	AKT1,GRB2,HRAS,IL6ST,JAK1,MAPK3,NRAS,PIK3C2A,PIK3C2B,PIK3C3,PIK3R1,PIK3R2,PIK3R5,RAF1,RAP1B,RPS6KA3,RPS6KA4,RPS6KB2,RRAS2,SOS1,STAT1,STAT3
Necroptosis Signaling Pathway	3.45	BIRC3,CAMK2B,CAMK2D,CAMK2G,CAPN1,CAPN10,CAPN3,CASP8,CFLAR,DNM1L,EIF2AK2,FADD,FAS,JAK1,MAP3K7,MDM2,MLKL,NGFR,PAM16,PELI1,PPP3CA,PPP3CB,PPP3CC,PYCARD,RBCK1,RBL2,RIPK1,RIPK3,SLC25A10,SLC25A3,STAT1,TAB1,TICAM1,TIMM10,TIMM13,TIMM17B,TIMM23,TIMM8A,TIMM8B,TNF,TNIP1,TOMM20,TOMM22,TOMM40,TOMM40L,TOMM70,VDAC1,VDAC3
JAK/Stat Signaling	3.44	AKT1,CDKN1A,FOS,GRB2,HRAS,JAK1,MAPK3,NRAS,PIAS1,PIAS2,PIK3C2A,PIK3C2B,PIK3C3,PIK3R1,PIK3R2,PIK3R5,PTPN1,RAF1,RAP1B,RELA,RRAS2,SHC1,SOCS6,SOS1,SOS2,STAT1,STAT3,STAT5A
FGF Signaling	3.42	AKT1,ATF2,ATF4,CREB1,CREB3,CREBBP,CRK,CRKL,FGF1,FGF19,FGF20,FGF9,GAB1,GRB2,HGF,HRAS,ITPR1,MAP2K3,MAPK3,PIK3C2A,PIK3C2B,PIK3C3,PIK3R1,PIK3R2,PIK3R5,RAC1,RAF1,SOS1,SOS2,STAT3
Aryl Hydrocarbon Receptor Signaling	3.41	AHR,ALDH16A1,ALDH18A1,ALDH1A3,ALDH1B1,ALDH1L1,ALDH1L2,ALDH3A2,ALDH4A1,ALDH6A1,ATM,BAX,CCNA2,CCNE1,CCNE2,CDK4,CDKN1A,CDKN2A,CHEK2,CTSD,DHFR,FAS,FOS,GSTO1,GSTP1,GSTZ1,HSP90AB1,MAPK3,MCM7,MDM2,MED1,NCOA2,NCOA3,NCOR2,NEDD8,NRIP1,POLA1,RBL2,RELA,RXRB,SLC35A2,SMARCA4,SRC,TNF,TRIP11
Opioid Signaling Pathway	3.41	ADCY2,ADCY3,ADCY7,AKT1,AP1B1,AP2A1,AP2B1,AP2S1,ARRB1,ATF2,ATF4,BRAF,CACNA1C,CALM1 (includes others),CALML5,CAMK2B,CAMK2D,CAMK2G,CDC42,CLTC,CREB1,CREB3,CREBBP,CTNNB1,FGR,FOS,GNAI1,GNAI2,GNAO1,GNAS,GRIN2B,GRINA,GRK6,HRAS,ITPR1,ITPR2,ITPR3,LCK,LYN,MAP2K3,MAPK15,MAPK3,MAPK6,NRAS,OPRK1,OPRL1,OPRM1,PDYN,PPP3CA,PPP3CB,PPP3CC,PRKCD,PRKCE,PRKCI,PRKCZ,RAC1,RAF1,RAP1B,RGS1,RGS10,RGS14,RGS19,RPS6KA3,RPS6KA4,…
TGF-β Signaling	3.41	ACVR1B,ACVR2B,BCL2,BMP4,BMPR2,CDC42,CREBBP,FOS,GRB2,GSC,HOXC9,HRAS,INHBB,IRF7,MAP2K3,MAP3K7,MAP4K1,MAPK3,NRAS,RAF1,RAP1B,RRAS2,RUNX2,RUNX3,SKI,SMAD2,SMAD4,SOS1,SOS2,TAB1,TRAF6,ZFYVE9
Insulin Receptor Signaling	3.33	AKT1,CRK,CRKL,EIF2B1,EIF2B5,EIF4E,GAB1,GRB2,GYS1,HRAS,INSR,JAK1,MAPK3,NCK1,NRAS,PDPK1,PIK3C2A,PIK3C2B,PIK3C3,PIK3R1,PIK3R2,PIK3R5,PPP1CC,PPP1R10,PPP1R14B,PPP1R3D,PPP1R7,PRKCI,PRKCZ,PTPN1,RAF1,RAP1B,RPS6KB2,RPTOR,RRAS2,SCNN1G,SHC1,SOS1,SOS2,STX4,SYNJ1,TRIP10,TSC1,VAMP2
Lymphotoxin β Receptor Signaling	3.29	AKT1,CREBBP,CXCL1,DIABLO,LTA,LTB,MAPK3,NFKBID,PDPK1,PIK3C2A,PIK3C2B,PIK3C3,PIK3R1,PIK3R2,PIK3R5,RELA,RELB,TNFSF14,TRAF1,TRAF5,TRAF6
Gap Junction Signaling	3.28	ADCY2,ADCY3,ADCY7,AKT1,BGLAP,CSNK1G1,CSNK1G3,CTNNB1,GNAI1,GNAI2,GNAS,GRB2,GRIA1,GRIK1,GRIK2,GUCY2D,HRAS,HTR2A,ITPR1,ITPR2,ITPR3,MAPK3,NRAS,NT5C,PDIA3,PIK3C2A,PIK3C2B,PIK3C3,PIK3R1,PIK3R2,PIK3R5,PLCB3,PLCD1,PLCG2,PPP3CA,PPP3CB,PPP3CC,PRKCD,PRKCE,PRKCI,PRKCZ,RAF1,RAP1B,RRAS2,SLC39A7,SMARCC2,SOS1,SOS2,SP3,SRC,TJP1,TJP2,TUBA1A,TUBA1B,TUBA4A,TUBB4A,TUBB4B,TUBB6,TUBG1
Role of Macrophages, Fibroblasts and Endothelial Cells in Rheumatoid Arthritis	3.28	AKT1,ATF2,ATF4,AXIN1,C5,CALM1 (includes others),CALML5,CAMK2B,CAMK2D,CAMK2G,CREB1,CREB3,CREBBP,CTNNB1,DKK3,FOS,FZD1,GNAO1,HRAS,ICAM1,IL15,IL16,IL17RC,IL32,IL37,IL6ST,IRAK2,LTA,LTB,MAP2K3,MAP3K7,MAPK3,MMP1,MYD88,NFAT5,NFATC1,NFATC3,NFKBIB,NFKBID,NGFR,NLK,NRAS,PDIA3,PGF,PIK3C2A,PIK3C2B,PIK3C3,PIK3R1,PIK3R2,PIK3R5,PLCB3,PLCD1,PLCG2,PPP3CA,PPP3CB,PPP3CC,PRKCD,PRKCE,PRKCI,PRKCZ,PRSS2,RAC1,RAF1,RAP1B,R…
Salvage Pathways of Pyrimidine Ribonucleotides	3.24	AICDA,APOBEC3F,BRAF,CDK1,CDK4,CDK5,CDK7,CDK8,DYRK1A,EIF2AK2,FAM20B,GRK6,HIPK1,LIMK1,LIMK2,MAP2K3,MAP3K6,MAP3K8,MAPK3,MAPK6,NEK2,NME1,NME4,NME5,NME7,PAK2,PIM1,PKN1,PRKAA1,PRKCD,PRKCE,PRPF4B,PYCR3,UCKL1,UPP1,UPRT
LPS-stimulated MAPK Signaling	3.24	ATF1,ATF2,CDC42,CREB1,FOS,HRAS,LBP,MAP2K3,MAP3K7,MAPK3,NFKBIB,NFKBID,NRAS,PIK3C2A,PIK3C2B,PIK3C3,PIK3R1,PIK3R2,PIK3R5,PRKCD,PRKCE,PRKCI,PRKCZ,RAC1,RAF1,RAP1B,RELA,RRAS2
PAK Signaling	3.14	ARHGEF6,ARHGEF7,CDC42,CFL1,CFL2,DSCAM,GRB2,HRAS,ITGA4,ITGB1,LIMK1,LIMK2,MAPK3,NCK1,NCK2,NRAS,PAK2,PIK3C2A,PIK3C2B,PIK3C3,PIK3R1,PIK3R2,PIK3R5,RAC1,RAF1,RAP1B,RRAS2,SHC1,SOS1,SOS2,TNF,WASL
UVA-Induced MAPK Signaling	3.14	ATM,FOS,HRAS,MAPK3,NRAS,PARP1,PARP10,PARP11,PARP2,PARP4,PARP6,PDIA3,PIK3C2A,PIK3C2B,PIK3C3,PIK3R1,PIK3R2,PIK3R5,PLCB3,PLCD1,PLCG2,RAP1B,RPS6KA3,RPS6KA4,RPS6KB2,RPS6KC1,RRAS2,SMPD1,STAT1,TIPARP,TNKS,TNKS2
Assembly of RNA Polymerase III Complex	3.13	BDP1,BRF2,GTF3C1,GTF3C2,GTF3C3,GTF3C4,GTF3C5,POLR3D
Thrombin Signaling	3.11	ADCY2,ADCY3,ADCY7,AKT1,ARHGEF1,ARHGEF12,ARHGEF16,ARHGEF2,ARHGEF6,ARHGEF9,CAMK2B,CAMK2D,CAMK2G,CDC42,CREB1,F2R,F2RL3,GNA12,GNA13,GNAI1,GNAI2,GNAO1,GNAS,GNB1L,GNG3,GRB2,HRAS,ITPR1,ITPR2,ITPR3,MAPK3,NRAS,PDIA3,PDPK1,PIK3C2A,PIK3C2B,PIK3C3,PIK3R1,PIK3R2,PIK3R5,PLCB3,PLCD1,PLCG2,PRKCD,PRKCE,PRKCI,PRKCZ,RAC1,RAF1,RAP1B,RELA,RHOT1,RHOV,RND2,ROCK1,RRAS2,SHC1,SOS1,SRC
Nucleotide Excision Repair Pathway	3.11	CCNH,CDK7,ERCC3,ERCC6,GTF2H2,GTF2H3,MNAT1,POLR2B,POLR2C,POLR2F,POLR2H,POLR2J2/POLR2J3,POLR2K,RPA2,XPC
Synaptic Long Term Potentiation	3.08	ATF2,ATF4,CACNA1C,CALM1 (includes others),CALML5,CAMK2B,CAMK2D,CAMK2G,CREB1,CREB3,CREBBP,GRIA1,GRIN2B,GRINA,GRM2,HRAS,ITPR1,ITPR2,ITPR3,MAPK3,NRAS,PDIA3,PLCB3,PLCD1,PLCG2,PPP1CC,PPP1R10,PPP1R14B,PPP1R3D,PPP1R7,PPP3CA,PPP3CB,PPP3CC,PRKCD,PRKCE,PRKCI,PRKCZ,RAF1,RAP1B,RAPGEF3,RRAS2
Virus Entry via Endocytic Pathways	3	ABL1,AP1B1,AP1M1,AP1S2,AP2A1,AP2B1,AP2S1,AP3M1,B2M,CD55,CDC42,CLTC,FLNA,HLA-F,HRAS,ITGA4,ITGAL,ITGB1,ITGB2,NRAS,PIK3C2A,PIK3C2B,PIK3C3,PIK3R1,PIK3R2,PIK3R5,PLCG2,PRKCD,PRKCE,PRKCI,PRKCZ,RAC1,RAP1B,RRAS2,SRC
Tight Junction Signaling	3	AKT1,ARHGEF2,CDC42,CDK4,CLDN20,CLDN3,CLDN9,CPSF1,CPSF3,CPSF4,CPSF6,CSTF3,CTNNB1,EPB41,F11R,FOS,HSF1,MPP5,MYH10,MYH13,NAPB,NAPG,NECTIN1,NECTIN3,NGFR,PPP2CB,PPP2R1B,PPP2R2A,PPP2R2B,PPP2R2C,PPP2R3B,PPP2R5A,PPP2R5C,PPP2R5D,PRKCI,PRKCZ,PTPA,RAC1,RELA,STX4,TJP1,TJP2,TNF,VAMP2,VAMP3,VAPA,VTI1B,YKT6
VEGF Signaling	2.99	ACTN4,AKT1,BCL2,EIF1,EIF2B1,EIF2B5,EIF2S1,ELAVL1,GRB2,HIF1A,HRAS,MAPK3,NRAS,PGF,PIK3C2A,PIK3C2B,PIK3C3,PIK3R1,PIK3R2,PIK3R5,PLCG2,RAF1,RAP1B,ROCK1,RRAS2,SH2D2A,SHC1,SOS1,SOS2,SRC,VEGFA,VEGFB,YWHAE
Role of p14/p19ARF in Tumor Suppression	2.98	CDKN2A,MDM2,NPM2,PIK3C2A,PIK3C2B,PIK3C3,PIK3R1,PIK3R2,PIK3R5,POLR3D,RAC1,SENP3,UBTF
Oncostatin M Signaling	2.97	GRB2,HRAS,IL6ST,JAK1,MAPK3,MMP1,MT2A,NRAS,PLAU,RAF1,RAP1B,RRAS2,SHC1,SOS1,STAT1,STAT3,STAT5A
RANK Signaling in Osteoclasts	2.97	AKT1,BIRC3,CALM1 (includes others),CALML5,FOS,MAP3K12,MAP3K4,MAP3K6,MAP3K7,MAP3K8,MAPK3,MITF,NFATC1,NFKBIB,NFKBID,PIK3C2A,PIK3C2B,PIK3C3,PIK3R1,PIK3R2,PIK3R5,PPP3CA,PPP3CB,PPP3CC,RAF1,RELA,SRC,TRAF5,TRAF6
Germ Cell-Sertoli Cell Junction Signaling	2.9	ACTN4,AKT1,AXIN1,CDC42,CFL1,CFL2,CTNNB1,CTNND1,HRAS,ILK,IQGAP1,ITGB1,LIMK1,LIMK2,MAP2K3,MAP3K12,MAP3K4,MAP3K6,MAP3K7,MAP3K8,MAPK3,NECTIN3,NRAS,PAK2,PDPK1,PIK3C2A,PIK3C2B,PIK3C3,PIK3R1,PIK3R2,PIK3R5,RAB8B,RAC1,RAP1B,RHOT1,RHOV,RND2,RRAS2,SRC,TJP1,TNF,TUBA1A,TUBA1B,TUBA4A,TUBB4A,TUBB4B,TUBB6,TUBG1,WASL
Small Cell Lung Cancer Signaling	2.88	ABL1,AKT1,BCL2,BID,CCNE1,CCNE2,CDK4,FHIT,MAX,NFKBIB,NFKBID,PIK3C2A,PIK3C2B,PIK3C3,PIK3R1,PIK3R2,PIK3R5,RELA,RXRB,SIN3A,SKP2,SUV39H1,TRAF1,TRAF5,TRAF6
HIPPO signaling	2.88	AJUBA,BTRC,FAT4,NF2,PPP1CC,PPP1R10,PPP1R14B,PPP1R3D,PPP1R7,PPP2CB,PPP2R1B,PPP2R2A,PPP2R2B,PPP2R2C,PPP2R3B,PPP2R5A,PPP2R5C,PPP2R5D,PTPA,SAV1,SCRIB,SKP2,SMAD2,SMAD4,TEAD4,TJP2,YWHAE,YWHAG
Role of Tissue Factor in Cancer	2.87	AKT1,ARRB1,CDC42,CFL1,CFL2,CXCL1,EIF4E,FGA,FGR,GNA12,GNA13,HRAS,ITGAV,ITGB1,LCK,LIMK1,LIMK2,LYN,MAPK3,MMP1,NRAS,PDXP,PIK3C2A,PIK3C2B,PIK3C3,PIK3R1,PIK3R2,PIK3R5,RAC1,RAP1B,RPS6KA3,RPS6KA4,RRAS2,SRC,STAT5A,VEGFA
DNA Double-Strand Break Repair by Homologous Recombination	2.84	ABL1,ATM,ATRX,BRCA1,LIG1,MRE11,NBN,POLA1
Endocannabinoid Developing Neuron Pathway	2.78	ADCY2,ADCY3,ADCY7,AKT1,ATF2,ATF4,BRAF,BRCA1,CREB1,CREB3,CREBBP,CTNNB1,GNAI1,GNAI2,GNAO1,GNB1L,HRAS,MAP2K3,MAPK15,MAPK3,MAPK6,NRAS,PIK3C2A,PIK3C2B,PIK3C3,PIK3R1,PIK3R2,PIK3R5,RAC1,RAF1,RAP1B,RPTOR,RRAS2,SRC,STAT3
Melanoma Signaling	2.77	AKT1,BRAF,CDK4,CDKN1A,CDKN2A,HRAS,MAPK3,MDM2,MITF,NRAS,PIK3C2A,PIK3C2B,PIK3C3,PIK3R1,PIK3R2,PIK3R5,RAF1,RAP1B,RRAS2
Paxillin Signaling	2.76	ACTN4,ARF1,ARF6,ARFIP2,ARHGEF6,ARHGEF7,CDC42,CRK,GIT2,GRB2,HRAS,ITGA4,ITGAL,ITGAV,ITGB1,ITGB2,NCK1,NCK2,NRAS,PAK2,PIK3C2A,PIK3C2B,PIK3C3,PIK3R1,PIK3R2,PIK3R5,RAC1,RAP1B,RRAS2,SOS1,SOS2,SRC,TLN1
CD28 Signaling in T Helper Cells	2.74	ACTR3,AKT1,ARPC2,ARPC5,CALM1 (includes others),CALML5,CARD11,CD80,CDC42,FOS,GRB2,HLA-DMA,HLA-DMB,ITPR1,ITPR2,ITPR3,LCK,LCP2,NFAT5,NFATC1,NFATC3,NFKBIB,NFKBID,PDPK1,PIK3C2A,PIK3C2B,PIK3C3,PIK3R1,PIK3R2,PIK3R5,PPP3CA,PPP3CB,PPP3CC,RAC1,RELA,SYK,WAS
G-Protein Coupled Receptor Signaling	2.74	ADCY2,ADCY3,ADCY7,ADORA2A,ADORA3,ADRA1D,ADRA2B,AGTR1,AKT1,ATF2,ATF4,BRAF,CAMK2B,CAMK2D,CAMK2G,CREB1,CREB3,CREBBP,DRD3,DUSP1,DUSP4,GDPD1,GNAI1,GNAI2,GNAO1,GNAS,GPER1,GRB2,GRM2,HRAS,HTR2A,HTR4,HTR6,MAP3K8,MAPK3,MC1R,NFKBIB,NFKBID,NRAS,OPRK1,OPRL1,OPRM1,PDE4B,PDE6C,PDE6D,PDE6G,PDE8A,PDPK1,PIK3C2A,PIK3C2B,PIK3C3,PIK3R1,PIK3R2,PIK3R5,PLCB3,PRKCE,RAF1,RAP1B,RAPGEF3,RASA1,RELA,RGS10,RGS14,RGS2,RRAS2,S1P…
IL-8 Signaling	2.71	AKT1,BAX,BCL2,BRAF,CDC42,CR2,CXCL1,CXCR1,FOS,GNA12,GNA13,GNAI1,GNAI2,GNAS,GNB1L,GNG3,HRAS,ICAM1,IQGAP1,IRAK2,ITGAV,ITGB2,LASP1,LIMK1,LIMK2,MAPK3,NFKBIB,NRAS,PAK2,PGF,PIK3C2A,PIK3C2B,PIK3C3,PIK3R1,PIK3R2,PIK3R5,PLD3,PRKCD,PRKCE,PRKCI,PRKCZ,RAB11FIP2,RAC1,RAF1,RAP1B,RELA,RHOT1,RHOV,RND2,ROCK1,RRAS2,SRC,TRAF6,VEGFA,VEGFB
Remodeling of Epithelial Adherens Junctions	2.71	ACTN4,ACTR3,ARF6,ARPC2,ARPC5,CTNNB1,CTNND1,DNM1L,EXOC2,HGF,IQGAP1,NME1,RAB5B,RAB5C,RAB7A,SRC,TUBA1A,TUBA1B,TUBA4A,TUBB4A,TUBB4B,TUBB6,TUBG1
Actin Nucleation by ARP-WASP Complex	2.7	ACTR3,ARPC2,ARPC5,CDC42,GNA12,GRB2,HRAS,ITGA4,ITGB1,NCK1,NCK2,NRAS,RAC1,RAP1B,RHOT1,RHOV,RND2,ROCK1,RRAS2,SOS1,SOS2,WAS,WASL,WIPF1
Macropinocytosis Signaling	2.7	ABI1,ACTN4,ARF6,CDC42,HGF,HRAS,ITGB1,ITGB2,NRAS,PIK3C2A,PIK3C2B,PIK3C3,PIK3R1,PIK3R2,PIK3R5,PLCG2,PRKCD,PRKCE,PRKCI,PRKCZ,RAC1,RAP1B,RRAS2,SRC,USP6NL
Tumoricidal Function of Hepatic Natural Killer Cells	2.69	AIFM1,BAX,BID,CASP6,CASP8,DFFA,ENDOG,FADD,FAS,ICAM1,ITGAL
Androgen Signaling	2.66	AR,CACNA1C,CALM1 (includes others),CALML5,CCNH,CDK7,CREBBP,DNAJB1,ERCC3,GNA12,GNA13,GNAI1,GNAI2,GNAO1,GNAS,GNB1L,GNG3,GTF2F1,GTF2H2,GTF2H3,HSPA4,KAT7,MAPK3,MNAT1,NCOA2,POLR2B,POLR2C,POLR2F,POLR2H,POLR2J2/POLR2J3,POLR2K,PRKCD,PRKCE,PRKCI,PRKCZ,RELA,SHC1,SRC,SRY,TAF2
cAMP-mediated signaling	2.65	ADCY2,ADCY3,ADCY7,ADORA2A,ADORA3,ADRA2B,AGTR1,AKAP1,AKAP10,AKAP11,AKAP12,AKAP13,AKAP17A,ATF2,ATF4,BRAF,CALM1 (includes others),CALML5,CAMK2B,CAMK2D,CAMK2G,CNGA3,CREB1,CREB3,CREBBP,DRD3,DUSP1,DUSP4,GDPD1,GNAI1,GNAI2,GNAO1,GNAS,GPER1,GRM2,HTR4,HTR6,MAPK3,MC1R,OPRK1,OPRL1,OPRM1,PDE4B,PDE6C,PDE6D,PDE6G,PDE8A,PKIA,PKIG,PPP3CA,PPP3CB,PPP3CC,RAF1,RAPGEF3,RGS10,RGS14,RGS2,S1PR1,SRC,STAT3,TBXA2R
Role of PKR in Interferon Induction and Antiviral Response	2.64	ATF2,ATF3,BAX,BID,CASP8,DNAJC3,EIF2AK2,EIF2S1,FADD,FANCC,FAS,FOS,HSP90AB1,HSPA1A/HSPA1B,HSPA1L,HSPA4,HSPA9,IFNGR1,IFNGR2,JAK1,MAP2K3,MAP3K7,MAPK3,METAP2,MSR1,MYD88,NFKBIB,NFKBID,PYCARD,RELA,STAT1,STAT3,TARBP2,TNF,TRAF6
RAR Activation	2.63	ADCY2,ADCY3,ADCY7,AKT1,ALDH1A3,CCNH,CDK7,CRABP2,CREBBP,CSNK2A1,CSNK2A2,CSNK2B,DUSP1,ERCC3,FOS,GTF2H2,GTF2H3,MED1,MMP1,MNAT1,NCOR1,NCOR2,NRIP1,PARP1,PDPK1,PIK3R1,PIK3R2,PML,PRKCD,PRKCE,PRKCI,PRKCZ,PRMT2,PSMC5,RAC1,RBP5,RDH11,RDH14,RDH5,RELA,RELB,RXRB,SMAD2,SMAD4,SMARCA4,SMARCC2,SMARCD2,SMARCD3,SRA1,SRC,STAT5A,TNIP1,TRIM24,VEGFA
T Cell Exhaustion Signaling Pathway	2.62	ACVR1B,ACVR2B,AKT1,BMPR2,CD274,CD80,EOMES,FOS,FOXP1,HLA-DMA,HLA-DMB,HLA-F,HRAS,IL10RB,IL12RB1,IRF4,JAK1,MAPK3,NFAT5,NFATC1,NFATC3,NRAS,PDCD1LG2,PIK3C2A,PIK3C2B,PIK3C3,PIK3R1,PIK3R2,PIK3R5,PLCG2,PPP2CB,PPP2R1B,PPP2R2A,PPP2R2B,PPP2R2C,PPP2R3B,PPP2R5A,PPP2R5C,PPP2R5D,PRDM1,PTPA,RAP1B,RRAS2,SMAD2,STAT1,STAT3,TBX21,TCF7,VEGFA
CD40 Signaling	2.62	ATF1,CD40,FCER2,FOS,ICAM1,LTA,MAP2K3,MAP3K7,MAPK3,NFKBIB,NFKBID,PIK3C2A,PIK3C2B,PIK3C3,PIK3R1,PIK3R2,PIK3R5,RELA,STAT3,TRAF1,TRAF5,TRAF6
T Cell Receptor Signaling	2.61	BTK,CALM1 (includes others),CALML5,CARD11,FOS,GRB2,HRAS,LCK,LCP2,MAPK3,NFAT5,NFATC1,NFATC3,NRAS,PIK3C2A,PIK3C2B,PIK3C3,PIK3R1,PIK3R2,PIK3R5,PPP3CA,PPP3CB,PPP3CC,RAC1,RAF1,RAP1B,RASA1,RELA,RRAS2,SHB,SOS1,SOS2,TEC
Renin-Angiotensin Signaling	2.61	ADCY2,ADCY3,ADCY7,AGTR1,ATF2,FOS,GRB2,HRAS,ITPR1,ITPR2,ITPR3,MAPK3,NRAS,PAK2,PIK3C2A,PIK3C2B,PIK3C3,PIK3R1,PIK3R2,PIK3R5,PLCG2,PRKCD,PRKCE,PRKCI,PRKCZ,RAC1,RAF1,RAP1B,RELA,RRAS2,SHC1,SHC3,SOS1,SOS2,STAT1,STAT3,TNF
Cleavage and Polyadenylation of Pre-mRNA	2.6	CPSF1,CPSF3,CPSF4,CPSF6,CSTF3,PAPOLA,WDR33
IGF-1 Signaling	2.6	AKT1,CSNK2A1,CSNK2A2,CSNK2B,FOS,GRB2,HRAS,JAK1,MAPK3,NEDD4,NRAS,PDPK1,PIK3C2A,PIK3C2B,PIK3C3,PIK3R1,PIK3R2,PIK3R5,PRKCI,PRKCZ,RAF1,RAP1B,RASA1,RPS6KB2,RRAS2,SHC1,SOCS6,SOS1,SOS2,STAT3,YWHAE,YWHAG
Role of Oct4 in Mammalian Embryonic Stem Cell Pluripotency	2.59	BMI1,BRCA1,CASP6,CCNF,CDX2,FBXO15,HOXB1,KDM5B,MEF2A,NR6A1,PARP1,PCGF6,PHB,PHC3,PPP1R8,RXRB,WWP2
ErbB Signaling	2.56	AKT1,CDC42,FOS,GRB2,HRAS,MAP2K3,MAPK3,NCK1,NCK2,NRAS,PAK2,PDPK1,PIK3C2A,PIK3C2B,PIK3C3,PIK3R1,PIK3R2,PIK3R5,PLCG2,PRKCD,PRKCE,PRKCI,PRKCZ,RAF1,RAP1B,RRAS2,SHC1,SOS1,SOS2
Rac Signaling	2.56	ABI2,ACTR3,ARFIP2,ARPC2,ARPC5,CDC42,CFL1,CFL2,CYFIP2,ELK4,HRAS,IQGAP1,ITGA4,ITGB1,LIMK1,LIMK2,MAPK3,NCKAP1,NRAS,PAK2,PIK3C2A,PIK3C2B,PIK3C3,PIK3R1,PIK3R2,PIK3R5,PIKFYVE,PRKCI,PRKCZ,RAC1,RAF1,RAP1B,RELA,RRAS2
Endometrial Cancer Signaling	2.53	AKT1,AXIN1,CTNNB1,GRB2,HRAS,ILK,MAPK3,MLH1,NRAS,PDPK1,PIK3C2A,PIK3C2B,PIK3C3,PIK3R1,PIK3R2,PIK3R5,RAF1,RAP1B,RRAS2,SOS1,SOS2
Ephrin B Signaling	2.52	ABI1,ACP1,AXIN1,CDC42,CFL1,CFL2,CTNNB1,EFNB2,EPHB2,GNA12,GNA13,GNAI1,GNAI2,GNAO1,GNAS,GNB1L,GNG3,HRAS,KALRN,LIMK1,MAPK3,NCK2,RAC1,ROCK1
Apoptosis Signaling	2.5	AIFM1,BAX,BCL2,BCL2A1,BID,BIRC3,CAPN1,CAPN10,CAPN3,CASP6,CASP8,CDK1,DFFA,DIABLO,ENDOG,FAS,HRAS,MAPK3,NFKBIB,NFKBID,NRAS,PARP1,PLCG2,PRKCE,RAF1,RAP1B,RELA,ROCK1,RRAS2,TNF
CDK5 Signaling	2.47	ABL1,ADCY2,ADCY3,ADCY7,BDNF,CAPN1,CDK5,GNAS,HRAS,ITGB1,MAPK15,MAPK3,MAPK6,NGFR,NRAS,PPP1CC,PPP1R10,PPP1R14B,PPP1R3D,PPP1R7,PPP2CB,PPP2R1B,PPP2R2A,PPP2R2B,PPP2R2C,PPP2R3B,PPP2R5A,PPP2R5C,PPP2R5D,PTPA,RAF1,RAP1B,RRAS2
IL-6 Signaling	2.46	AKT1,CSNK2A1,CSNK2A2,CSNK2B,CYP19A1,FOS,GRB2,HRAS,IL37,IL6ST,LBP,MAP2K3,MAP3K7,MAPK3,NFKBIB,NFKBID,NGFR,NRAS,PIK3C2A,PIK3C2B,PIK3C3,PIK3R1,PIK3R2,PIK3R5,RAF1,RAP1B,RELA,RRAS2,SHC1,SOS1,SOS2,STAT3,TAB1,TNF,TRAF6,VEGFA
IL-4 Signaling	2.46	AKT1,FCER2,GRB2,HLA-DMA,HLA-DMB,HMGA1,HRAS,IRF4,JAK1,NFAT5,NFATC1,NFATC3,NR3C1,NRAS,PIK3C2A,PIK3C2B,PIK3C3,PIK3R1,PIK3R2,PIK3R5,RAP1B,RPS6KB2,RRAS2,SHC1,SOS1,SOS2,SYNJ1
Interferon Signaling	2.46	BAX,BCL2,IFI35,IFIT1,IFITM2,IFNGR1,IFNGR2,JAK1,MX1,PIAS1,PSMB8,PTPN2,RELA,STAT1
PPAR Signaling	2.44	CREBBP,FOS,GRB2,HRAS,HSP90AB1,IL37,INSR,MAP3K7,MAPK3,MED1,NCOR1,NCOR2,NFKBIB,NFKBID,NGFR,NR1H3,NRAS,NRIP1,PPARA,RAF1,RAP1B,RELA,RRAS2,SHC1,SOS1,SOS2,SRA1,STAT5A,TAB1,TNF,TRAF6
IL-15 Signaling	2.44	AKT1,GNB1L,HRAS,IL15,JAK1,LCK,MAPK3,NRAS,PIK3C2A,PIK3C2B,PIK3C3,PIK3R1,PIK3R2,PIK3R5,RAF1,RAP1B,RELA,RPS6KB2,RPTOR,RRAS2,SHC1,STAT3,STAT5A,SYK
DNA damage-induced 14-3-3σ Signaling	2.4	AKT1,ATM,BRCA1,CCNB1,CCNE1,CCNE2,CDK1,RAD17,RAD9A
Acute Myeloid Leukemia Signaling	2.4	AKT1,BRAF,GRB2,HRAS,IDH3B,IDH3G,MAP2K3,MAPK3,NRAS,PIK3C2A,PIK3C2B,PIK3C3,PIK3R1,PIK3R2,PIK3R5,PIM1,PIM2,PML,RAF1,RAP1B,RELA,RPS6KB2,RRAS2,SOS1,SOS2,STAT3,STAT5A,TCF7
Glioblastoma Multiforme Signaling	2.39	AKT1,AXIN1,CCNE1,CDC42,CDK4,CDKN1A,CDKN2A,CTNNB1,E2F2,E2F3,E2F5,FZD1,GRB2,HRAS,ITPR1,ITPR2,ITPR3,MAPK3,MDM2,NF1,NF2,NRAS,PDIA3,PIK3C2A,PIK3C2B,PIK3C3,PIK3R1,PIK3R2,PIK3R5,PLCB3,PLCD1,PLCG2,PRKCD,RAC1,RAF1,RAP1B,RHOT1,RHOV,RND2,RRAS2,SHC1,SOS1,SOS2,SRC,TSC1,WNT9B
GNRH Signaling	2.39	ADCY2,ADCY3,ADCY7,ATF2,ATF4,CACNA1C,CALM1 (includes others),CALML5,CAMK2B,CAMK2D,CAMK2G,CDC42,CREB1,CREB3,CREBBP,FOS,FSHB,GNAI1,GNAI2,GNAS,GNRH1,GRB2,HRAS,ITPR1,ITPR2,ITPR3,MAP2K3,MAP3K12,MAP3K4,MAP3K6,MAP3K7,MAP3K8,MAPK3,NRAS,PAK2,PLCB3,PRKCD,PRKCE,PRKCI,PRKCZ,RAC1,RAF1,RAP1B,RELA,RRAS2,SOS1,SOS2,SRC
HER-2 Signaling in Breast Cancer	2.37	AKT1,CCNE1,CCNE2,CDC42,CDKN1A,GRB2,HRAS,ITGB1,ITGB2,MDM2,NRAS,PIK3C2A,PIK3C2B,PIK3C3,PIK3R1,PIK3R2,PIK3R5,PRKCD,PRKCE,PRKCI,PRKCZ,RAP1B,RRAS2,SOS1,SOS2,TSC1
Neuropathic Pain Signaling In Dorsal Horn Neurons	2.37	BDNF,CAMK2B,CAMK2D,CAMK2G,CREB1,FOS,GRIA1,GRIN2B,GRINA,GRM2,ITPR1,ITPR2,ITPR3,KCNN3,KCNQ2,MAPK3,PDIA3,PIK3C2A,PIK3C2B,PIK3C3,PIK3R1,PIK3R2,PIK3R5,PLCB3,PLCD1,PLCG2,PRKCD,PRKCE,PRKCI,PRKCZ,SRC
iNOS Signaling	2.37	CALM1 (includes others),CALML5,CREBBP,FOS,HMGA1,IFNGR1,IFNGR2,IRAK2,JAK1,LBP,MYD88,NFKBIB,NFKBID,RELA,STAT1,TAB1,TRAF6
Granzyme B Signaling	2.36	BID,CASP8,DFFA,ENDOG,LMNB1,LMNB2,PARP1,PRKDC
Estrogen-mediated S-phase Entry	2.36	CCNA2,CCNE1,CCNE2,CDC25A,CDK1,CDK4,CDKN1A,E2F2,E2F3,E2F5,SKP2
Neuregulin Signaling	2.36	AKT1,CDK5,CRK,CRKL,ERBIN,GRB2,HRAS,HSP90AB1,ITGA4,ITGB1,MAPK3,NRAS,PDPK1,PIK3R1,PIK3R2,PLCG2,PRKCD,PRKCE,PRKCI,PRKCZ,PSEN1,RAF1,RAP1B,RPS6KB2,RRAS2,SHC1,SOS1,SOS2,SRC,STAT5A
Axonal Guidance Signaling	2.31	ABL1,ABLIM1,ACTR3,ADAM12,ADAM8,ADAM9,ADAMTS13,ADAMTS17,ADAMTS3,AKT1,ARHGEF12,ARHGEF6,ARHGEF7,ARPC2,ARPC5,BDNF,BMP4,BMP6,BRCC3,CDC42,CDK5,CFL1,CFL2,COPS5,CRK,CRKL,ECE2,EFNA1,EFNA4,EFNB2,EIF4E,EPHA5,EPHA6,EPHB2,FZD1,GDF7,GLI3,GNA12,GNA13,GNAI1,GNAI2,GNAO1,GNAS,GNB1L,GNG3,GRB2,HRAS,ITGA4,ITGB1,KALRN,LIMK1,LIMK2,LNPEP,MAPK3,MKNK1,MMP1,MMP14,MMP16,NCK1,NCK2,NFAT5,NFATC1,NFATC3,NGFR,NRAS,PAK2,PDIA3,PFN…
Polyamine Regulation in Colon Cancer	2.29	AZIN1,CTNNB1,MAX,MXD1,OAZ1,PSME1,PSME3,PSME4,SAT1,SAT2
BEX2 Signaling Pathway	2.29	AKT1,BBC3,BCL2,CDKN1A,CTNNB1,HIF1A,KLK3,NGFR,PGF,PPP2CB,PPP2R1B,PPP2R2A,PPP2R2B,PPP2R2C,PPP2R3B,PPP2R5A,PPP2R5C,PPP2R5D,PTPA,RELA,STAT3,TCF7,TSC1,VEGFA,VEGFB
Angiopoietin Signaling	2.28	AKT1,BIRC5,CRK,GRB14,GRB2,HRAS,NCK1,NFKBIB,NFKBID,NRAS,PAK2,PIK3C2A,PIK3C2B,PIK3C3,PIK3R1,PIK3R2,PIK3R5,RAP1B,RASA1,RELA,RRAS2,SOS1,STAT5A,TNIP1
Ephrin A Signaling	2.27	CDC42,CFL1,CFL2,EFNA1,EFNA4,EPHA5,EPHA6,LIMK1,NGFR,PIK3C2A,PIK3C2B,PIK3C3,PIK3R1,PIK3R2,PIK3R5,RAC1,ROCK1
Role of JAK1 and JAK3 in γc Cytokine Signaling	2.26	GRB2,HRAS,IL15,IL21R,IL2RA,JAK1,MAPK3,NRAS,PIK3C2A,PIK3C2B,PIK3C3,PIK3R1,PIK3R2,PIK3R5,RAP1B,RRAS2,SHC1,STAT1,STAT3,STAT5A,SYK,TSLP
SPINK1 General Cancer Pathway	2.26	AKT1,HRAS,JAK1,MAPK3,MT1A,MT1B,MT1E,MT1M,MT1X,MT2A,NRAS,PIK3C2A,PIK3C2B,PIK3C3,PIK3R1,PIK3R2,PIK3R5,PRSS2,RAF1,RAP1B,RRAS2,STAT3
Adrenomedullin signaling pathway	2.23	ADCY2,ADCY3,ADCY7,ADM,AKT1,BAX,BCL2,BRAF,C3,CALM1 (includes others),CALML5,FOS,GNAS,GRB2,GUCY2D,HIF1A,HRAS,IL37,ITPR1,ITPR2,ITPR3,KCNN3,KCNQ2,LTA,MAP2K3,MAPK15,MAPK3,MAPK6,MAX,NRAS,NT5C,PDIA3,PIK3C2A,PIK3C2B,PIK3C3,PIK3R1,PIK3R2,PIK3R5,PLCB3,PLCD1,PLCG2,RAF1,RAP1B,RELA,RRAS2,RXRB,SHC1,SHC3,SLC39A7,SMARCC2,SOS1,SOS2,TNF
Mouse Embryonic Stem Cell Pluripotency	2.22	AKT1,AXIN1,BMP4,BMPR2,CREBBP,CTNNB1,DVL3,FZD1,GRB2,HRAS,IL6ST,JAK1,MAP3K7,MAPK3,NRAS,PIK3C2A,PIK3C2B,PIK3C3,PIK3R1,PIK3R2,PIK3R5,RAF1,RAP1B,RRAS2,SMAD4,SOS1,SOS2,STAT3,TAB1,TCF7
14-3-3-mediated Signaling	2.22	AKT1,BAX,FOS,GRB2,HRAS,MAPK3,NRAS,PDIA3,PIK3C2A,PIK3C2B,PIK3C3,PIK3R1,PIK3R2,PIK3R5,PLCB3,PLCD1,PLCG2,PRKCD,PRKCE,PRKCI,PRKCZ,RAF1,RAP1B,RRAS2,SRC,TNF,TSC1,TUBA1A,TUBA1B,TUBA4A,TUBB4A,TUBB4B,TUBB6,TUBG1,YWHAE,YWHAG
Melatonin Signaling	2.2	BRAF,CALM1 (includes others),CALML5,CAMK2B,CAMK2D,CAMK2G,GNAI1,GNAI2,GNAO1,GNRH1,MAP2K3,MAPK3,PDIA3,PLCB3,PLCD1,PLCG2,PRKCD,PRKCE,PRKCI,PRKCZ,RAF1,RORA,RORB,RORC
Estrogen-Dependent Breast Cancer Signaling	2.2	AKT1,ATF2,ATF4,CREB1,CREB3,CREBBP,CYP19A1,FOS,HRAS,HSD17B14,HSD17B4,MAPK3,NRAS,PIK3C2A,PIK3C2B,PIK3C3,PIK3R1,PIK3R2,PIK3R5,RAP1B,RELA,RRAS2,SRC,STAT5A
Regulation of the Epithelial-Mesenchymal Transition Pathway	2.2	AKT1,APH1A,AXIN1,BCL9,BRAF,CLDN3,CTNNB1,DVL3,ETS1,FGF1,FGF19,FGF20,FGF9,FZD1,GAB1,GRB2,GSC,HGF,HIF1A,HRAS,JAG1,JAK1,MAP2K3,MAPK3,NOTCH1,NRAS,PIK3C2A,PIK3C2B,PIK3C3,PIK3R1,PIK3R2,PIK3R5,PSEN1,PSEN2,PSENEN,PYGO2,RAF1,RAP1B,RBPJ,RELA,RRAS2,SMAD2,SMAD4,SOS1,SOS2,STAT3,TCF7,TWIST1,WNT9B,ZEB1
Regulation of IL-2 Expression in Activated and Anergic T Lymphocytes	2.17	CALM1 (includes others),CALML5,CARD11,CD80,FOS,GRB2,HRAS,MAPK3,NFAT5,NFATC1,NFATC3,NFKBIB,NFKBID,NRAS,PLCG2,PPP3CA,PPP3CB,PPP3CC,RAC1,RAF1,RAP1B,RELA,RRAS2,SMAD2,SMAD4,SOS1,SOS2
Death Receptor Signaling	2.17	ARHGDIB,BCL2,BID,BIRC3,CASP6,CASP8,CFLAR,DFFA,DIABLO,FADD,FAS,LIMK1,NFKBIB,NFKBID,PARP1,PARP10,PARP11,PARP2,PARP4,PARP6,RELA,RIPK1,ROCK1,TIPARP,TNF,TNKS,TNKS2
Gαq Signaling	2.14	ADRA1D,AGTR1,AKT1,BTK,CALM1 (includes others),CALML5,CDC42,GNAS,GNB1L,GNG3,GYS1,HTR2A,ITPR1,ITPR2,ITPR3,MAPK3,NFATC1,NFATC3,NFKBIB,NFKBID,PIK3C2A,PIK3C2B,PIK3C3,PIK3R1,PIK3R2,PIK3R5,PLCB3,PLCG2,PLD3,PPP3CA,PPP3CB,PPP3CC,PRKCD,PRKCE,PRKCI,PRKCZ,RAC1,RAF1,RELA,RGS2,RHOT1,RHOV,RND2,ROCK1
Role of NFAT in Cardiac Hypertrophy	2.13	ADCY2,ADCY3,ADCY7,AKT1,CACNA1C,CALM1 (includes others),CALML5,CAMK2B,CAMK2D,CAMK2G,CTF1,GNAI1,GNAI2,GNAS,GNB1L,GNG3,GRB2,HDAC2,HDAC4,HDAC8,HDAC9,HRAS,IL6ST,ITPR1,ITPR2,ITPR3,MAP2K3,MAP3K7,MAPK3,MEF2A,MEF2B,NRAS,PDIA3,PIK3C2A,PIK3C2B,PIK3C3,PIK3R1,PIK3R2,PIK3R5,PLCB3,PLCD1,PLCG2,PPP3CA,PPP3CB,PPP3CC,PRKCD,PRKCE,PRKCI,PRKCZ,RAF1,RAP1B,RRAS2,SHC1,SOS1,SOS2,SRC
DNA Methylation and Transcriptional Repression Signaling	2.12	ARID4B,CHD3,DNMT3A,H3-3A/H3-3B,H4C14,H4C3,HDAC2,MBD3,MTA1,MTA2,RBBP4,RBBP7,SIN3A
DNA Double-Strand Break Repair by Non-Homologous End Joining	2.12	ATM,LIG4,MRE11,NBN,PARP1,PRKDC,WRN
Growth Hormone Signaling	2.11	CSHL1,FOS,MAPK3,PDPK1,PIK3C2A,PIK3C2B,PIK3C3,PIK3R1,PIK3R2,PIK3R5,PLCG2,PRKCD,PRKCE,PRKCI,PRKCZ,RPS6KA3,RPS6KA4,RPS6KB2,RPS6KC1,SOCS6,STAT1,STAT3,STAT5A
p38 MAPK Signaling	2.1	ATF1,ATF2,ATF4,CREB1,CREB3,CREBBP,DDIT3,DUSP1,DUSP10,FADD,FAS,H3-3A/H3-3B,IL37,IRAK2,MAP2K3,MAP3K7,MAP4K1,MAPKAPK3,MAPKAPK5,MAX,MEF2A,MEF2B,MKNK1,MKNK2,RPS6KA3,RPS6KA4,RPS6KB2,RPS6KC1,STAT1,TAB1,TIFA,TNF,TRAF6
Tec Kinase Signaling	2.09	BTK,CDC42,FADD,FAS,FGR,FOS,GNA12,GNA13,GNAI1,GNAI2,GNAO1,GNAS,GNB1L,GNG3,GTF2I,ITGA4,ITGB1,JAK1,LCK,LYN,PAK2,PIK3C2A,PIK3C2B,PIK3C3,PIK3R1,PIK3R2,PIK3R5,PLCG2,PRKCD,PRKCE,PRKCI,PRKCZ,RAC1,RELA,RHOT1,RHOV,RND2,SRC,STAT1,STAT3,STAT5A,TEC,TNF,WAS
Amyotrophic Lateral Sclerosis Signaling	2.03	BAX,BCL2,BID,BIRC3,CACNA1C,CAPN1,CAPN10,CAPN3,CAT,CCS,GRIA1,GRIK1,GRIK2,GRIN2B,GRINA,PGF,PIK3C2A,PIK3C2B,PIK3C3,PIK3R1,PIK3R2,PIK3R5,PPP3CA,RAB5B,RAB5C,RAC1,RNF19A,SOD1,VEGFA,VEGFB
PTEN Signaling	2.03	AKT1,BCL2,BMPR2,CDC42,CDKN1A,CSNK2A1,CSNK2A2,CSNK2B,GRB2,HRAS,ILK,INSR,ITGA4,ITGB1,MAGI1,MAPK3,MAST2,MCRS1,NGFR,NRAS,PDPK1,PIK3R1,PIK3R2,PIK3R5,PRKCZ,RAC1,RAF1,RAP1B,RELA,RPS6KB2,RRAS2,SHC1,SOS1,SOS2,SYNJ1
HIF1α Signaling	2.02	AKT1,COPS5,CREBBP,CUL2,EGLN1,EGLN2,EGLN3,HIF1A,HRAS,LDHA,MAPK15,MAPK3,MAPK6,MDM2,MMP1,MMP14,MMP16,NAA10,NRAS,PGF,PIK3C2A,PIK3C2B,PIK3C3,PIK3R1,PIK3R2,PIK3R5,RAP1B,RRAS2,SLC2A14,SLC2A3,VEGFA,VEGFB
Cholecystokinin/Gastrin-mediated Signaling	2.01	ATF2,CDC42,FOS,GNA12,GNA13,GRB2,HRAS,IL37,ITPR1,ITPR2,ITPR3,MAP2K3,MAPK3,MEF2A,MEF2B,NRAS,PLCB3,PRKCD,PRKCE,PRKCI,PRKCZ,RAC1,RAF1,RAP1B,RHOT1,RHOV,RND2,ROCK1,RRAS2,SHC1,SOS1,SOS2,SRC,TNF
Wnt/β-catenin Signaling	1.98	ACVR1B,ACVR2B,AKT1,APPL1,APPL2,AXIN1,BCL9,BMPR2,BTRC,CDKN2A,CREBBP,CSNK1G1,CSNK1G3,CSNK2A1,CSNK2A2,CSNK2B,CTNNB1,DKK3,DVL3,FZD1,GNAO1,ILK,MAP3K7,MAP4K1,MDM2,NLK,PIN1,PPP2CB,PPP2R1B,PPP2R2A,PPP2R2B,PPP2R2C,PPP2R3B,PPP2R5A,PPP2R5C,PPP2R5D,PTPA,RPS27A,SOX4,SOX9,SRC,TAB1,TCF7,TLE3,WNT9B
CCR3 Signaling in Eosinophils	1.97	CALM1 (includes others),CALML5,CCL26,CFL1,CFL2,GNAI1,GNAI2,GNAS,GNB1L,GNG3,HRAS,ITPR1,ITPR2,ITPR3,LIMK1,LIMK2,MAPK3,NRAS,PAK2,PIK3C2A,PIK3C2B,PIK3C3,PIK3R1,PIK3R2,PIK3R5,PLCB3,PRKCD,PRKCE,PRKCI,PRKCZ,RAC1,RAF1,RAP1B,ROCK1,RRAS2
VEGF Family Ligand-Receptor Interactions	1.95	AKT1,FOS,GRB2,HRAS,MAPK3,NRAS,PGF,PIK3C2A,PIK3C2B,PIK3C3,PIK3R1,PIK3R2,PIK3R5,PLCG2,PRKCD,PRKCE,PRKCI,PRKCZ,RAF1,RAP1B,RRAS2,SHC1,SOS1,SOS2,VEGFA,VEGFB
Cardiac Hypertrophy Signaling	1.94	ADCY2,ADCY3,ADCY7,ADRA1D,ADRA2B,ADSS2,AKT1,ATF2,CACNA1C,CALM1 (includes others),CALML5,CDC42,CREB1,CREBBP,EIF2B1,EIF2B5,EIF4E,GNA12,GNA13,GNAI1,GNAI2,GNAO1,GNAS,GNB1L,GNG3,GRB2,HRAS,MAP2K3,MAP3K12,MAP3K4,MAP3K6,MAP3K7,MAP3K8,MAPK3,MAPKAPK3,MEF2A,MEF2B,NRAS,PDIA3,PIK3C2A,PIK3C2B,PIK3C3,PIK3R1,PIK3R2,PIK3R5,PLCB3,PLCD1,PLCG2,PPP3CA,PPP3CB,PPP3CC,RAC1,RAF1,RAP1B,RHOT1,RHOV,RND2,ROCK1,RRAS2,SOS1,TAB1
CXCR4 Signaling	1.93	ADCY2,ADCY3,ADCY7,AKT1,CDC42,CRK,ELMO1,ELMO2,FOS,GNA12,GNA13,GNAI1,GNAI2,GNAO1,GNAS,GNB1L,GNG3,HRAS,ITPR1,ITPR2,ITPR3,LYN,MAPK3,NRAS,PAK2,PIK3C2A,PIK3C2B,PIK3C3,PIK3R1,PIK3R2,PIK3R5,PLCB3,PRKCD,PRKCE,PRKCI,PRKCZ,RAC1,RAF1,RAP1B,RHOT1,RHOV,RND2,ROCK1,RRAS2,SRC
Cardiac Hypertrophy Signaling (Enhanced)	1.93	ACVR1B,ACVR2B,ADCY2,ADCY3,ADCY7,ADRA1D,ADRA2B,AGTR1,AKAP13,AKT1,ATF2,BMPR2,CACNA1C,CALM1 (includes others),CALML5,CAMK2B,CAMK2D,CAMK2G,CD70,CTF1,CTNNB1,CXCR1,DIAPH3,DVL3,EIF2B1,EIF2B5,EIF4E,FGF1,FGF19,FGF20,FGF9,FZD1,GDPD1,GNA12,GNA13,GNAI1,GNAI2,GNAS,HDAC2,HDAC4,HDAC8,HDAC9,HRAS,IL10RB,IL12RB1,IL15,IL17RC,IL17RE,IL21R,IL22RA2,IL25,IL2RA,IL37,IL6ST,ITGA4,ITGB1,ITPR1,ITPR2,ITPR3,LTA,LTB,MAP2K3,MAP…
ErbB2-ErbB3 Signaling	1.92	AKT1,GRB2,HRAS,MAPK3,NRAS,PDPK1,PIK3C2A,PIK3C2B,PIK3C3,PIK3R1,PIK3R2,PIK3R5,RAF1,RAP1B,RRAS2,SHC1,SOS1,SOS2,STAT3,STAT5A
Wnt/Ca+ pathway	1.92	ATF2,ATF4,AXIN1,CREB1,CREB3,CREBBP,DVL3,FZD1,NFAT5,NFATC1,NFATC3,PDE6C,PDE6D,PDE6G,PDIA3,PLCB3,PLCD1,PLCG2,PPP3CA,RELA
IL-9 Signaling	1.91	JAK1,PIK3C2A,PIK3C2B,PIK3C3,PIK3R1,PIK3R2,PIK3R5,RELA,STAT1,STAT3,STAT5A,TNF
Induction of Apoptosis by HIV1	1.91	BAX,BBC3,BCL2,BID,BIRC3,CASP8,DFFA,DIABLO,FADD,FAS,NFKBIB,NFKBID,NGFR,RELA,RIPK1,SLC25A10,SLC25A3,TNF,TRAF1
Mechanisms of Viral Exit from Host Cells	1.89	CHMP2A,CHMP4A,CHMP4B,CHMP6,LMNB1,LMNB2,NEDD4,PRKCD,PRKCE,PRKCI,PRKCZ,SH3GLB2,SNF8,VPS4A
Th1 Pathway	1.87	APH1A,CD274,CD40,CD80,CXCR3,GRB2,HLA-DMA,HLA-DMB,ICAM1,ICOSLG/LOC102723996,IFNGR1,IFNGR2,IL10RB,IL12RB1,ITGB2,JAK1,LTA,NFATC1,NFATC3,NOTCH1,PIK3C2A,PIK3C2B,PIK3C3,PIK3R1,PIK3R2,PIK3R5,PSEN1,PSEN2,PSENEN,RUNX3,STAT1,STAT3,TBX21
Fcγ Receptor-mediated Phagocytosis in Macrophages and Monocytes	1.87	ACTR3,AKT1,ARF6,ARPC2,ARPC5,CDC42,CRK,FGR,GAB2,LCP2,LYN,MAPK3,NCK1,NCK2,PIK3R1,PIK3R2,PLD3,PRKCD,PRKCE,PRKCI,PRKCZ,RAC1,RPS6KB2,SRC,SYK,TLN1,VAMP3,WAS
Regulation of Cellular Mechanics by Calpain Protease	1.84	ACTN4,CAPN1,CAPN10,CAPN3,CAST,CCNA2,CCNE1,CDK1,CDK4,CNGA3,GRB2,HRAS,ITGA4,ITGB1,MAPK3,NRAS,RAP1B,RRAS2,SRC,TLN1
Systemic Lupus Erythematosus Signaling	1.84	AKT1,C5,C7,C8A,CD40,CD79A,CD79B,CD80,EFTUD2,FOS,GRB2,HLA-F,HNRNPA2B1,HNRNPC,HRAS,IL37,LCK,LSM1,LSM14A,LSM14B,LSM2,LSM5,LSM6,LYN,MAPK3,NFAT5,NFATC1,NFATC3,NRAS,PIK3C2A,PIK3C2B,PIK3C3,PIK3R1,PIK3R2,PIK3R5,PIM2,PLCG2,PRPF19,PRPF3,PRPF38A,PRPF39,PRPF4B,RAP1B,RNPC3,RRAS2,SF3B4,SNRNP35,SNRNP70,SNRPA,SNRPB,SNRPD1,SNRPN,SOS1,SOS2,TLR7,TNF,ZCRB1
PKCθ Signaling in T Lymphocytes	1.83	CACNA1C,CAMK2B,CAMK2D,CAMK2G,CARD11,CD80,FOS,GRB2,HLA-DMA,HLA-DMB,HRAS,LCK,LCP2,MAP3K12,MAP3K4,MAP3K6,MAP3K7,MAP3K8,MAPK3,NFAT5,NFATC1,NFATC3,NFKBIB,NFKBID,NRAS,PIK3C2A,PIK3C2B,PIK3C3,PIK3R1,PIK3R2,PIK3R5,PLCG2,PPP3CA,PPP3CB,PPP3CC,RAC1,RAP1B,RELA,RRAS2,SOS1,SOS2
Role of NANOG in Mammalian Embryonic Stem Cell Pluripotency	1.8	AKT1,AXIN1,BMP4,BMP6,BMPR2,CDX2,CTNNB1,FZD1,GAB1,GRB2,HRAS,IL6ST,JAK1,MAPK3,NRAS,PIK3C2A,PIK3C2B,PIK3C3,PIK3R1,PIK3R2,PIK3R5,RAF1,RAP1B,RIF1,RRAS2,SHC1,SMAD4,SOS1,SOS2,STAT3,TCL1A,WNT9B
P2Y Purigenic Receptor Signaling Pathway	1.8	ADCY2,ADCY3,ADCY7,AKT1,ATF2,ATF4,CREB1,CREB3,CREBBP,FOS,GNAI1,GNAI2,GNB1L,GNG3,HRAS,MAPK3,NRAS,P2RY11,PDIA3,PIK3C2A,PIK3C2B,PIK3C3,PIK3R1,PIK3R2,PIK3R5,PLCB3,PLCD1,PLCG2,PRKCD,PRKCE,PRKCI,PRKCZ,RAF1,RAP1B,RELA,RRAS2
Role of IL-17F in Allergic Inflammatory Airway Diseases	1.79	ATF2,ATF4,CREB1,CREB3,CREBBP,CXCL1,IL17RC,MAPK3,RAF1,RELA,RPS6KA3,RPS6KA4,TRAF3IP2,TRAF6
Neuroinflammation Signaling Pathway	1.79	ACVR1B,ACVR2B,AGER,AKT1,APH1A,ATF2,ATF4,B2M,BCL2,BDNF,BIRC3,BIRC5,BMPR2,CALB2,CASP8,CD40,CD80,CFLAR,CREB1,CREB3,CREBBP,CTNNB1,FAS,FOS,FZD1,GABRA6,GABRB3,GRIA1,GRIN2B,GRINA,HLA-DMA,HLA-DMB,HLA-F,ICAM1,IFNGR1,IFNGR2,IRAK2,IRF7,JAK1,KLK3,MAPK15,MAPK3,MAPK6,MYD88,NFAT5,NFATC1,NFATC3,P2RX7,PIK3C2A,PIK3C2B,PIK3C3,PIK3R1,PIK3R2,PIK3R5,PLCG2,PPP3CA,PPP3CB,PPP3CC,PSEN1,PSEN2,PSENEN,PYCARD,RELA,RIPK1,SOD2,…
IL-7 Signaling Pathway	1.76	AKT1,BAX,BCL2,CDC25A,CXCR5,GRB2,HGF,JAK1,LYN,MAPK3,NFATC1,PDPK1,PIK3C2A,PIK3C2B,PIK3C3,PIK3R1,PIK3R2,PIK3R5,SHC1,SOS1,SOS2,STAT1,STAT5A
Leukocyte Extravasation Signaling	1.73	ABL1,ACTN4,ARHGAP35,ARHGAP9,BTK,CD99,CDC42,CLDN20,CLDN3,CLDN9,CRK,CRKL,CTNNB1,CTNND1,DLC1,F11R,GNAI1,GNAI2,ICAM1,ITGA4,ITGAL,ITGB1,ITGB2,MAP3K4,MMP1,MMP14,MMP16,MSN,PIK3C2A,PIK3C2B,PIK3C3,PIK3R1,PIK3R2,PIK3R5,PLCG2,PRKCD,PRKCE,PRKCI,PRKCZ,RAC1,RAP1B,RAPGEF3,RASSF5,ROCK1,SIPA1,SRC,TEC,WAS,WASL,WIPF1
Endothelin-1 Signaling	1.73	ADCY2,ADCY3,ADCY7,BRAF,CASP4,CASP6,CASP8,ECE2,FOS,GAB1,GNA12,GNA13,GNAI1,GNAI2,GNAO1,GNAS,GRB2,GUCY2D,HRAS,ITPR1,ITPR2,ITPR3,MAPK15,MAPK3,MAPK6,NRAS,PDIA3,PIK3C2A,PIK3C2B,PIK3C3,PIK3R1,PIK3R2,PIK3R5,PLAAT4,PLB1,PLCB3,PLCD1,PLCG2,PLD3,PRKCD,PRKCE,PRKCI,PRKCZ,RAF1,RAP1B,RRAS2,SHC1,SHC3,SOS1,SRC
PD-1, PD-L1 cancer immunotherapy pathway	1.72	AKT1,B2M,CBLB,CD274,CD80,CSNK2A1,CSNK2A2,CSNK2B,FBXO38,HLA-DMA,HLA-DMB,HLA-F,IFNGR1,IFNGR2,IL2RA,JAK1,LCK,LCP2,NGFR,PDCD1LG2,PIK3C2A,PIK3C2B,PIK3C3,PIK3R1,PIK3R2,PIK3R5,SKP2,STAT5A,TNF
IL-15 Production	1.69	AATK,ABL1,ABL2,BTK,CLK1,CLK2,CLK3,CLK4,DDR1,DYRK1A,DYRK4,EPHA5,EPHA6,EPHB2,FGR,IL15,INSR,JAK1,LCK,LMTK2,LYN,MAP2K3,PRKCI,PRKCZ,RELA,RYK,SRC,STAT1,SYK,TEC,TNK2,TWF1
Xenobiotic Metabolism Signaling	1.68	AHR,ALDH16A1,ALDH18A1,ALDH1A3,ALDH1B1,ALDH1L1,ALDH1L2,ALDH3A2,ALDH4A1,ALDH6A1,ANKRA2,CAMK2B,CAMK2D,CAMK2G,CAT,CES2,CHST12,CREBBP,FMO4,GSTO1,GSTP1,GSTZ1,HDAC4,HRAS,HS2ST1,HS3ST5,HSP90AB1,IL4I1,MAP2K3,MAP3K12,MAP3K4,MAP3K6,MAP3K7,MAP3K8,MAPK3,MED1,MGMT,NCOR2,NRAS,NRIP1,PIK3C2A,PIK3C2B,PIK3C3,PIK3R1,PIK3R2,PIK3R5,PPP2CB,PPP2R1B,PPP2R2A,PPP2R2B,PPP2R2C,PPP2R3B,PPP2R5A,PPP2R5C,PPP2R5D,PRKCD,PRKCE,PRKC…
BER pathway	1.67	FEN1,LIG1,PARP1,PCNA,PNKP,POLG
Breast Cancer Regulation by Stathmin1	1.67	ADGRA3,ADGRG4,ADGRG5,ADORA2A,ADORA3,ADRA1D,ADRA2B,AGTR1,ARHGEF1,ARHGEF12,ARHGEF16,ARHGEF17,ARHGEF2,ARHGEF6,ARHGEF7,ARHGEF9,ATF2,ATF4,AURKB,BMP6,CAMK2B,CAMK2D,CAMK2G,CDK1,CDK4,CREB1,CREB3,CREBBP,CXCR1,CYSLTR1,DRD3,E2F2,E2F3,E2F5,F2R,F2RL3,FZD1,GNA13,GNB1L,GNG3,GPER1,GPR108,GPR137,GPR137B,GPR143,GPR149,GPR153,GPR155,GPR156,GPR19,GPR55,GPR65,GPR68,GPR75,GPR84,GPR87,GPR89A/GPR89B,GRB2,GRM2,HGF,HIF1A,…
Th1 and Th2 Activation Pathway	1.67	ACVR1B,ACVR2B,APH1A,BMPR2,CD274,CD40,CD80,CXCR3,GRB2,HLA-DMA,HLA-DMB,ICAM1,ICOSLG/LOC102723996,IFNGR1,IFNGR2,IL10RB,IL12RB1,IL25,IL2RA,ITGB2,JAG1,JAK1,LTA,NFATC1,NFATC3,NOTCH1,PIK3C2A,PIK3C2B,PIK3C3,PIK3R1,PIK3R2,PIK3R5,PSEN1,PSEN2,PSENEN,RUNX3,S1PR1,STAT1,STAT3,STAT5A,TBX21,TNFRSF4,TSLP
Role of JAK1, JAK2 and TYK2 in Interferon Signaling	1.64	CGA,IFNGR1,IFNGR2,JAK1,PTPN2,RAF1,RELA,STAT1,STAT3
UVB-Induced MAPK Signaling	1.64	AKT1,EIF4E,FOS,H3-3A/H3-3B,MAPK3,PIK3C2A,PIK3C2B,PIK3C3,PIK3R1,PIK3R2,PIK3R5,PRKCD,PRKCE,PRKCI,PRKCZ,RPS6KA3
Autophagy	1.61	ATG10,ATG16L1,ATG4A,ATG7,ATG9A,BCL2,CTSD,CTSL,CTSO,CTSZ,LAMP1,LAMP2,MAP1LC3B,NBR1,PIK3C3,ULK1,VPS16,VPS33B,VPS39
IL-23 Signaling Pathway	1.61	AKT1,HIF1A,IL12RB1,PIK3C2A,PIK3C2B,PIK3C3,PIK3R1,PIK3R2,PIK3R5,RELA,RORA,RORC,STAT3,TNF
Ovarian Cancer Signaling	1.61	ABL1,AKT1,ARRB1,AXIN1,BCL2,BRAF,BRCA1,CDK4,CDKN2A,CGA,CTNNB1,FGF9,FSHB,FZD1,HRAS,MAPK3,MLH1,NRAS,PGF,PIK3C2A,PIK3C2B,PIK3C3,PIK3R1,PIK3R2,PIK3R5,RAF1,RAP1B,RPS6KB2,RRAS2,SIN3A,SRC,SUV39H1,TCF7,VEGFA,VEGFB,WNT9B
Corticotropin Releasing Hormone Signaling	1.6	ADCY2,ADCY3,ADCY7,ARPC5,ATF2,ATF4,BDNF,BRAF,CACNA1C,CALM1 (includes others),CALML5,CREB1,CREB3,CREBBP,FOS,GLI3,GNAI1,GNAI2,GNAO1,GNAS,GUCY2D,ITPR1,ITPR2,ITPR3,MAPK3,MEF2A,MEF2B,NR4A1,NT5C,PLCG2,PRKCD,PRKCE,PRKCI,PRKCZ,RAF1,RAP1B,SLC39A7,SMARCC2,VEGFA
FcγRIIB Signaling in B Lymphocytes	1.55	AKT1,BTK,CACNA1C,CD79A,CD79B,GRB2,HRAS,LYN,NRAS,PDPK1,PIK3C2A,PIK3C2B,PIK3C3,PIK3R1,PIK3R2,PIK3R5,PLCG2,RAP1B,RRAS2,SHC1,SOS1,SYK
Signaling by Rho Family GTPases	1.55	ACTR3,ARFIP2,ARHGEF1,ARHGEF12,ARHGEF16,ARHGEF17,ARHGEF2,ARHGEF6,ARHGEF7,ARHGEF9,ARPC2,ARPC5,CDC42,CDC42EP1,CFL1,CFL2,DIAPH3,FOS,GNA12,GNA13,GNAI1,GNAI2,GNAO1,GNAS,GNB1L,GNG3,IQGAP1,ITGA4,ITGB1,LIMK1,LIMK2,MAP3K12,MAPK3,MSN,NEDD4,PAK2,PIK3C2A,PIK3C2B,PIK3C3,PIK3R1,PIK3R2,PIK3R5,PIKFYVE,PKN1,PRKCI,PRKCZ,RAC1,RAF1,RELA,RHOT1,RHOV,RND2,ROCK1,SEPTIN4,STMN1,WAS,WASL,WIPF1
Notch Signaling	1.51	APH1A,HEY1,JAG1,MFNG,NOTCH1,NUMB,NUMBL,PSEN1,PSEN2,PSENEN,RBPJ,RFNG
IL-17A Signaling in Airway Cells	1.48	AKT1,CXCL1,CXCL3,IL17RC,JAK1,MAP3K7,MAPK3,NFKBIB,NFKBID,PIK3C2A,PIK3C2B,PIK3C3,PIK3R1,PIK3R2,PIK3R5,RELA,STAT3,TRAF3IP2,TRAF6
eNOS Signaling	1.48	ADCY2,ADCY3,ADCY7,AKT1,AQP3,CALM1 (includes others),CALML5,CASP8,CCNA2,CHRNA5,CHRNA9,CHRNB3,CNGA3,GNAS,HSP90AB1,HSPA1A/HSPA1B,HSPA1L,HSPA4,HSPA9,ITPR1,ITPR2,ITPR3,LPAR5,PDPK1,PGF,PIK3C2A,PIK3C2B,PIK3C3,PIK3R1,PIK3R2,PIK3R5,PLCG2,PRKAA1,PRKAB1,PRKAB2,PRKCD,PRKCE,PRKCI,PRKCZ,SLC7A1,VEGFA,VEGFB
Phagosome Maturation	1.48	ATP6V0C,ATP6V0E1,ATP6V1E1,ATP6V1E2,B2M,CANX,CTSD,CTSL,CTSO,CTSZ,DCTN4,DYNC2H1,DYNLRB1,EEA1,HLA-F,LAMP1,LAMP2,NAPB,NAPG,PIK3C3,PIKFYVE,RAB5B,RAB5C,RAB7A,TUBA1A,TUBA1B,TUBA4A,TUBB4A,TUBB4B,TUBB6,TUBD1,TUBG1,VAMP2,VAMP3,VPS16,VPS33B,VPS39,VTI1B,YKT6
Cardiac β-adrenergic Signaling	1.47	ADCY2,ADCY3,ADCY7,AKAP1,AKAP10,AKAP11,AKAP12,AKAP13,AKAP17A,CACNA1C,GDPD1,GNAS,GNB1L,GNG3,PDE4B,PDE6C,PDE6D,PDE6G,PDE8A,PKIA,PKIG,PLN,PPP1CC,PPP1R10,PPP1R14B,PPP1R3D,PPP1R7,PPP2CB,PPP2R1B,PPP2R2A,PPP2R2B,PPP2R2C,PPP2R3B,PPP2R5A,PPP2R5C,PPP2R5D,PTPA
Spliceosomal Cycle	1.46	U2AF1/U2AF1L5,U2AF2
Role of Pattern Recognition Receptors in Recognition of Bacteria and Viruses	1.45	C3,C5,CD70,CREB1,EIF2AK2,EIF2S1,IL15,IL25,IL37,IRF7,LTA,LTB,MAPK3,MYD88,OAS2,PIK3C2A,PIK3C2B,PIK3C3,PIK3R1,PIK3R2,PIK3R5,PLCG2,PRKCD,PRKCE,PRKCI,PRKCZ,RELA,RIPK2,RNASEL,SYK,TICAM1,TLR1,TLR6,TLR7,TNF,TNFSF14,TNFSF9,TRAF6
Mismatch Repair in Eukaryotes	1.45	EXO1,FEN1,MLH1,PCNA,POLD1,RFC2,RFC3
Apelin Cardiomyocyte Signaling Pathway	1.41	AKT1,CAT,GNAI1,GNAI2,HIF1A,ITPR1,MAPK15,MAPK3,MAPK6,PDIA3,PIK3C2A,PIK3C2B,PIK3C3,PIK3R1,PIK3R2,PIK3R5,PLCB3,PLCD1,PLCG2,PLN,PRKCD,PRKCE,PRKCI,PRKCZ,SLC9A2,SLC9A3,SLC9A6
Toll-like Receptor Signaling	1.41	ECSIT,EIF2AK2,FOS,IL37,IRAK2,LBP,MAP2K3,MAP3K7,MYD88,PPARA,RELA,RPS27A,TAB1,TICAM1,TICAM2,TLR1,TLR6,TLR7,TNF,TRAF1,TRAF6
Relaxin Signaling	1.4	ADCY2,ADCY3,ADCY7,AKT1,BRAF,CREB1,FOS,GDPD1,GNA12,GNA13,GNAI1,GNAI2,GNAO1,GNAS,GNB1L,GNG3,GUCY2D,MAPK3,NFKBIB,NFKBID,NT5C,PDE4B,PDE6C,PDE6D,PDE6G,PDE8A,PIK3C2A,PIK3C2B,PIK3C3,PIK3R1,PIK3R2,PIK3R5,PRKCZ,RAP1B,RELA,RLN2,SLC39A7,SMARCC2,VEGFA
Myc Mediated Apoptosis Signaling	1.4	BAX,BBC3,BCL2,BID,CASP8,CDKN2A,CFLAR,CREBBP,FADD,FAS,MAX,MDM2,NGFR,PMAIP1,TNF
Fc Epsilon RI Signaling	1.39	AKT1,BTK,GAB1,GRB2,HRAS,LCP2,LYN,MAP2K3,MAPK3,NRAS,PDPK1,PIK3C2A,PIK3C2B,PIK3C3,PIK3R1,PIK3R2,PIK3R5,PLCG2,PRKCD,PRKCE,PRKCI,PRKCZ,RAC1,RAF1,RAP1B,RRAS2,SOS1,SOS2,SYK,SYNJ1,TNF
Gαi Signaling	1.37	ADCY2,ADCY3,ADCY7,ADORA3,ADRA2B,AGTR1,DRD3,GNAI1,GNAI2,GNAS,GNB1L,GNG3,GRB2,GRM2,HRAS,MAPK3,NRAS,OPRK1,OPRL1,OPRM1,RAF1,RAP1B,RGS10,RGS14,RRAS2,S1PR1,SHC1,SOS1,SOS2,SRC,STAT3,TBXA2R
Telomere Extension by Telomerase	1.35	HNRNPA2B1,MRE11,NBN,POT1,TNKS,TNKS2
GP6 Signaling Pathway	1.34	AKT1,BTK,CALM1 (includes others),CALML5,COL12A1,COL25A1,COL4A5,COL6A2,COL7A1,COL8A1,COL9A1,FGA,ITPR1,LCP2,LYN,PDPK1,PIK3C2A,PIK3C2B,PIK3C3,PIK3R1,PIK3R2,PIK3R5,PLCG2,PRKCD,PRKCE,PRKCI,PRKCZ,RAC1,RAP1B,SYK,TLN1
PPARα/RXRα Activation	1.34	ACVR1B,ACVR2B,ADCY2,ADCY3,ADCY7,ADIPOR1,BMPR2,CKAP5,CREBBP,FASN,GNAS,GRB2,HRAS,HSP90AB1,INSR,MAP2K3,MAP3K7,MAPK3,MED1,MED23,MED24,NCOA3,NCOR1,NCOR2,NFKBIB,NFKBID,NRAS,PDIA3,PLCB3,PLCD1,PLCG2,PPARA,PRKAA1,PRKAB1,PRKAB2,RAF1,RAP1B,RELA,RRAS2,SHC1,SMAD2,SMAD4,SOS1,SOS2,TGS1,TRAF6
Colorectal Cancer Metastasis Signaling	1.33	ADCY2,ADCY3,ADCY7,AKT1,APPL1,ARRB1,AXIN1,BAX,BIRC5,BRAF,CDC42,CTNNB1,FOS,FZD1,GNAS,GNB1L,GNG3,GRB2,HRAS,IFNGR1,IL6ST,JAK1,MAPK3,MLH1,MMP1,MMP14,MMP16,NRAS,PGF,PIK3C2A,PIK3C2B,PIK3C3,PIK3R1,PIK3R2,PIK3R5,PTGER1,RAC1,RAP1B,RELA,RHOT1,RHOV,RND2,RRAS2,SIAH1,SMAD2,SMAD4,SOS1,SOS2,SRC,STAT1,STAT3,TCF7,TLR1,TLR6,TLR7,TNF,VEGFA,VEGFB,WNT9B
Acute Phase Response Signaling	1.33	AKT1,AMBP,C3,C4A/C4B,C5,CRABP2,ECSIT,FGA,FOS,GRB2,HMOX2,HRAS,IL37,IL6ST,LBP,MAP2K3,MAP3K7,MAPK3,MYD88,NFKBIB,NFKBID,NGFR,NR3C1,NRAS,PDPK1,PIK3R1,PIK3R2,RAF1,RAP1B,RBP5,RELA,RIPK1,RRAS2,SERPINA1,SHC1,SOCS6,SOD2,SOS1,SOS2,STAT3,TAB1,TNF,TRAF6
IL-17A Signaling in Fibroblasts	1.33	FOS,IL17RC,MAP3K7,MAPK3,MMP1,NFKBIB,NFKBID,NFKBIZ,RELA,TRAF3IP2,TRAF6
*Negative logarithm of the Fisher Exact p-value which represents the probability that the pathway is not over-represented among the respective dataset of genes, where a value of 1.3 is equivalent to a p-value of 0.05.
